1 **Mammalian SWI/SNF collaborates with a polycomb-associated protein to regulate male**  
2 **germ line transcription in the mouse**

3  
4

5 Debashish U. Menon, Yoichiro Shibata, Weipeng Mu and Terry Magnuson

6

7 Department of Genetics, and Lineberger Comprehensive Cancer Center, The University of North  
8 Carolina at Chapel Hill, Chapel Hill, North Carolina, NC 27599-7264, USA

9 \*Correspondence: [trm4@med.unc.edu](mailto:trm4@med.unc.edu), Tel 919-962-1319, Fax 919-843-4682

10

11 **Abstract:**

12 A deficiency in BRG1, the catalytic subunit of the SWI/SNF chromatin remodeling complex,  
13 results in a meiotic arrest during spermatogenesis. Here, we explore the causative mechanisms.  
14 BRG1 is preferentially enriched at active promoters of genes essential for spermatogonial  
15 pluripotency and meiosis. In contrast, BRG1 is also associated with the repression of somatic  
16 genes. Chromatin accessibility at these target promoters is dependent upon BRG1. These  
17 results favor a model where BRG1 coordinates spermatogenic transcription to ensure meiotic  
18 progression. In spermatocytes, BRG1 interacts with SCML2, a testes specific PRC1 factor that  
19 is associated with the repression of somatic genes. We present evidence to suggest that BRG1  
20 and SCML2 concordantly regulate genes during meiosis. Furthermore, BRG1 is required for the  
21 proper localization of SCML2 and its associated deubiquitinase, USP7, to the sex chromosomes  
22 during pachynema. SCML2 associated, mono ubiquitination of histone H2A lysine 119  
23 (H2AK119ub1) and acetylation of histone lysine 27 (H3K27ac) are elevated in *Brg1<sup>cko</sup>* testes.  
24 Coincidentally, the PRC1 ubiquitin ligase, RNF2 is activated while a histone H2A/H2B  
25 deubiquitinase, USP3 is repressed. Thus, BRG1 impacts the male epigenome by influencing the  
26 localization and expression of epigenetic modifiers. This mechanism highlights a novel  
27 paradigm of co-operativity between SWI/SNF and PRC1.

28

29 **Keywords:** SWI/SNF chromatin remodeling, BRG1, transcriptional regulation, SCML2

30  
31  
32  
33  
34

1 **Summary statement**

2 BRG1, a catalytic subunit of SWI/SNF chromatin remodeling complex, interacts with  
3 SCML2 (Sex comb on midleg-like 2), a polycomb repressive 1 (PRC1) factor, to regulate  
4 transcription during spermatogenesis. This represents a novel paradigm of SWI/SNF -  
5 PRC1 co-operation during gametogenesis.

6 **Introduction:**

7

8 Spermatogenesis is a developmental cascade in which genetic information is passed on  
9 from mitotic precursors to meiotically derived haploid gametes. This process is particularly  
10 sensitive to the activity of several epigenetic regulators, known to influence meiotic  
11 recombination. Examples include the role of the meiosis specific H3K4 methyltransferase  
12 PR domain zinc finger protein9 (PRDM9) in double stranded break (DSB) formation, the  
13 roles of polycomb repressive complex2 (PRC2) and the H3K9 methyl transferases,  
14 EHMT2- Euchromatic histone lysine N-methyltransferase 2 (G9a); Suppressor of  
15 variegation 3-9 1 or 2 (SUV39H1/H2) in homolog pairing (synapsis) (Brick et al., 2012;  
16 Diagouraga et al., 2018; Hayashi et al., 2005; Mu et al., 2014; Tachibana et al., 2007;  
17 Takada et al., 2011). Other critical activities include the regulation of spermatogenic  
18 transcription by the polycomb repressive complexes, PRC1 and PRC2 (Hasegawa et al.,  
19 2015; Mu et al., 2014). Furthermore the ATP dependent family of nucleosome remodelers  
20 such as INO80, SWI/SNF and CHD5, known to modulate chromatin accessibility are also  
21 essential for spermatogenesis. (Kim et al., 2012; Li et al., 2014; Serber et al., 2015). In  
22 summary, chromatin modifiers play a vital role in germ line development.

23

24 Our lab previously reported the role of BRG1 (SMARCA4 – SWI/SNF catalytic subunit) in  
25 male meiosis (Kim et al., 2012). Briefly, the germ line depletion of BRG1 results in  
26 pachytene arrest. Mutant spermatocytes display unrepaired DNA DSBs evidenced by  
27 persistent  $\gamma$ H2Ax, chromosomal asynapsis, and reduced MLH1 foci, a marker of  
28 crossovers ( Kim et al., 2012, Wang et al. 2012). Coincidentally, an enhanced level of  
29 repressive chromatin is observed in mutant spermatocytes. Since SWI/SNF modulates  
30 chromatin accessibility by either sliding or evicting nucleosomes (Clapier et al., 2017), it  
31 is plausible that changes in chromatin structure seen in the *Brg1<sup>CKO</sup>* testes might result in  
32 meiotic defects by potentially influencing transcription or DNA repair. Both processes are  
33 influenced by SWI/SNF.

34

35 SWI/SNF is associated with both gene activation and repression. In mouse embryonic  
36 fibroblasts, BRG1 and the core SWI/SNF subunit, SNF5 co-ordinate nucleosome  
37 occupancy at promoters to achieve transcriptional regulation (Tolstorukov et al., 2013).

38 The transcriptional outcome is often dictated by the subunit composition of the complex,  
39 which in turn can influence its genome-wide association and interactions with other gene  
40 regulators (Euskirchen et al., 2011; Raab et al., 2015; Raab et al., 2017). This is a theme  
41 that features frequently in the regulation of tissue and cell type specific transcriptional  
42 programs that impact critical processes such as embryonic stem (ES) cell pluripotency  
43 and differentiation, neuronal and cardiac cell fate specification (Ho and Crabtree, 2010).  
44 Thus, SWI/SNF directed gene regulation plays a critical role during development.

45

46 Apart from gene regulation, SWI/SNF has also been implicated in several DNA repair  
47 mechanisms. In Yeast and cell culture models, SWI/SNF is recruited to sites of DNA  
48 damage to promote accessibility and stimulate  $\gamma$ H2Ax, a key component of the DNA  
49 damage response (DDR) signaling pathway (Kwon et al., 2015; Lee et al., 2010; Ogiwara  
50 et al., 2011). Other activities include the recruitment of homologous recombination (HR)  
51 and non-homologous end joining (NHEJ) repair factors (Ogiwara et al., 2011; Qi et al.,  
52 2014; Watanabe et al., 2014), the transcriptional silencing of regions adjacent to DNA DSB  
53 (Kakarougkas et al., 2013). While BRG1 is dispensable for  $\gamma$ H2Ax formation during  
54 meiosis, it has been reported to influence the distribution of DDR factors like RAD51 (DNA  
55 recombinase) and RPA (Replication protein A1) (Kim et al., 2012).

56

57 In this study we present evidence to show that BRG1 coordinates spermatogenic  
58 transcription. BRG1 activates genes essential for maintaining spermatogonial  
59 pluripotency and meiotic progression. In contrast it represses somatic genes. Our data  
60 suggest that somatic gene repression is achieved through an interaction with SCML2  
61 (Sex comb on midleg-like 2), a known testis specific PRC1 (Polycomb Repressive  
62 Complex 1) member (Luo et al., 2015). BRG1 is required for the normal localization of  
63 SCML2 and its interacting partner, USP7 (Ubiquitin Specific Peptidase 7) during  
64 pachynema, suggesting a role in recruitment. Furthermore, histone modifications  
65 associated with SCML2, such as the repressive mono ubiquitination of histone H2A  
66 lysine 119 (H2AK119ub1) and activating acetylation of histone lysine 27 (H3K27ac) are  
67 perturbed in *Brg1<sup>ckO</sup>* testes. Coincidentally, BRG1 also activates the expression of the  
68 H2A ubiquitin ligase, RNF2 (Ring Finger Protein 2) and represses the histone H2A/H2B  
69 deubiquitinase, USP3 (Ubiquitin Specific Peptidase 3). Thus SWI/SNF can epigenetically  
70 regulate germ line transcription by SCML2 dependent and independent mechanisms.

71

72

73

74

75

76

77

78

79

80 **Results:**

81

82 **BRG1 associates with transcriptionally active and poised chromatin**

83 To understand the functions of SWI/SNF activity during meiosis, we determined the  
84 genome-wide association of BRG1 by ChIP-seq. We reasoned that the examination of  
85 BRG1 occupancy concurrent to critical meiotic processes such as DSB repair and  
86 homologous chromosome synapsis would yield insight into the molecular mechanisms  
87 underlying the meiotic defects observed in the *Brg1<sup>fl/Δ</sup>; Mvh-cre<sup>Tg/0</sup> (Brg1<sup>ckO</sup>*; see materials  
88 and methods) males. For this purpose we isolated chromatin from spermatogenic cells  
89 obtained from P12 (mostly pre-pachytene germ cells) and P18 testes (predominantly  
90 pachytene spermatocytes) (Bellve et al., 1977; Goetz et al., 1984). At these stages, BRG1  
91 appears to be enriched promoter proximally (Fig. 1A, panels 1 & 4). This is consistent with  
92 the fact that more than 50% of BRG1 peaks associate with promoters at P12 and P18,  
93 while only a minority map to distal sites (Fig. S1A). By performing K-means clustering we  
94 categorized transcription start sites (TSS) into three different classes (class1: CI-1, class2:  
95 CI-2, class: CI-3) based upon their association with BRG1. These TSS's feature high (CI-  
96 1), medium (CI-2) and insignificant (CI-3) BRG1 enrichment.

97

98 To gain insight into the activity of genes associated with BRG1 in spermatogenic cells, we  
99 surveyed the chromatin environment surrounding their TSS's. We monitored the  
100 enrichment of activating trimethylation of histone H3 lysine 4 (H3K4me3) and repressive  
101 trimethylation of histone H3 lysine 27 (H3K27me3), associated with class1-3 TSS's at P12  
102 and P17 (Mu et al., 2014) (Fig. 1A). Robust H3K4me3 enrichment appeared to be  
103 associated only with CI-1 and CI-2 TSS's from P12 to P17 (Fig. 1A, panels 2 & 5). In  
104 contrast, H3K27me3 levels at P12 and P17 appear depleted at CI-1 TSS's featuring high  
105 BRG1 occupancy (Fig. 1A, panels 3 & 6). Such antagonism is a well-established feature  
106 of SWI/SNF and PRC2 genomic associations (Wilson et al., 2010). CI-3 TSS's only  
107 displayed basal levels of H3K27me3, which is particularly discernable at P17. Unlike CI-1  
108 and CI-3, CI-2 TSS's display significantly higher levels of H3K27me3, which appears  
109 progressively enhanced from P12 to P17 (Fig. 1A, panels 3 & 6). The co-occurrence of  
110 H3K27me3 and H3K4me3 at CI-2 TSS's resemble features of bivalent promoters, which  
111 are usually associated with transcriptionally quiescent genes poised to be reactivated at  
112 later stages of development (Bernstein et al., 2006; Hammoud et al., 2014; Lesch et al.,

113 2013). Thus genes associated with CI-2 TSS's likely represent repressed BRG1 target  
114 genes. In contrast potential activated gene targets appear to be associated with CI-1  
115 TSS's.

116

117 To understand BRG1 directed gene regulation in the context of spermatogenesis, we  
118 categorized genes associated with each K-means cluster (Fig. 1A), by their temporal  
119 expression profiles, previously determined from whole-testes RNA seq data (Margolin et  
120 al., 2014). These include genes maximally expressed in testes, at P6 (pre-meiotic: Pmei),  
121 from P8-P20 (meiotic: Mei), at P38 (Late, adult testis), from P6-P38 (Constantly; Const)  
122 and those expressed at low levels in testes from P6-P38 (Low, < 2 Reads per Kilobase  
123 per Million of Reads; RPKM). The majority of CI-1 associated genes were meiotic with  
124 relatively fewer pre-meiotic genes. In contrast, CI-2 and CI-3 were mostly comprised of  
125 pre-meiotic and low genes (Fig. S1B). This is particularly interesting given that CI-1 TSS's  
126 are exclusively marked by H3K4me3, while CI-2 promoters display bivalent chromatin  
127 modifications. We observed similar trends when monitoring H3K4me3 and H3K27me3  
128 dynamics, at TSS's of BRG1 target genes (P12 peaks) categorized by their temporal  
129 expression profile during meiosis (P12 to P17) (Fig. 1B). Over this duration all gene  
130 categories experience a 4-fold decrease in BRG1 enrichment in the presence of abundant  
131 H3K4me3 (Fig. 1B, top and middle row). Only pre-meiotic and low gene targets display  
132 elevated levels of H3K27me3 from P12 to P17 (Fig. 1B, bottom row), distinguishing them  
133 from, meiotic, constant and late gene targets, that appear exclusively marked by  
134 H3K4me3 (Fig. 1B, middle and bottom row). Candidate pre-meiotic targets such as  
135 *Zbtb16* and *Id4*, which are markers of undifferentiated spermatogonial cells along with  
136 *Pdgfra*, a somatic signaling receptor, that are normally repressed during meiosis, display  
137 bivalent promoters (Basciani et al., 2002; Green et al., 2018; Hammoud et al., 2014). In  
138 contrast, meiotic target, *Sycp1*, which is essential for synaptonemal complex assembly  
139 displays a H3K4me3 enriched promoter (Fig. S1C) (De Vries et al., 2005). Thus BRG1  
140 might co-ordinate the expression of genes over the measured course of spermatogenesis.

141

142 Given its association with active (H3K4me3) and poised (H3K4me3/H3K37me3)  
143 chromatin, we were curious to examine BRG1 localization to the sex chromosomes, which  
144 are transcriptionally silenced during pachynema (reviewed in Turner, 2007). We examined  
145 BRG1 occupancy at the TSS's of X – linked genes at P12 (Pre-pachytene stages) and

146 P18 (Pachytene stages). BRG1 enrichment at X – linked TSS's appeared reduced at P18  
147 relative to P12, but not absent (Fig. 1C). Thus BRG1 associates with meiotically  
148 inactivated sex chromosome.

149

150 Apart from TSS's, H3K4me3 is also enriched at DSB/recombination hotspots, known to  
151 be associated with a meiosis specific histone methyl transferase, PRDM9 (Brick et al.,  
152 2012; Diagouraga et al., 2018; Hayashi et al., 2005). We therefore examined BRG1  
153 association at these PRDM9 sites previously mapped by CHIP-seq in P12 testes (Baker  
154 et al., 2015). The lack of enrichment at PRDM9 peaks makes it unlikely that BRG1 directly  
155 affects DSB formation (Fig. S1D). Thus BRG1 might play a major role in gene regulation  
156 during meiosis.

157

158

### 159 **BRG1 co-ordinates spermatogenic gene expression**

160 The promoter centric association of BRG1 prompted us to examine its influence on the  
161 transcription of target genes by RNA-seq. We compared transcript abundance between  
162 spermatogenic cells isolated from P12 *Brg1<sup>fl/+</sup>* (*Brg1<sup>WT</sup>*) and *Brg1<sup>fl/Δ</sup>; Mvh-cre<sup>Tg/0</sup>* (*Brg1<sup>CKO</sup>*)  
163 testes, where the germ cell populations are mostly pre-pachytene and therefore unlikely  
164 to be influenced by pachytene arrest. In fact, the loss of BRG1 did not appear to affect the  
165 development of pre-pachytene spermatocytes as staged by  $\gamma$ H2Ax (meiotic marker) at  
166 P10 and P13 (Fig. S2A, left panel). Incidence of pachytene arrest only manifest at P14  
167 (Fig. S2A, left panel). In agreement with these results, the abundance of pre-pachytene  
168 protein coding transcripts (Ball et al., 2016) appeared similar between P12 *Brg1<sup>WT</sup>* and  
169 *Brg1<sup>CKO</sup>* testes (Fig. S2A). Only, early and late pachytene specific transcripts were slightly  
170 less abundant upon the loss of BRG1 at P12, predictive of pachytene arrest at later stages  
171 (Fig. S2A, right panel). Overall we do not expect the analysis of gene expression to be  
172 impacted significantly by secondary effects such as developmental delays.

173

174 To identify genes significantly mis-expressed ( $FDR \leq 0.05$ ) upon the loss of BRG1, we  
175 performed an edgeR analysis on the RNA-seq data. An equivalent number of genes are  
176 either transcriptionally down regulated ( $n=1100$ ) or up regulated ( $n=983$ ) in P12 *Brg1<sup>CKO</sup>*  
177 relative to *Brg1<sup>WT</sup>* testes (Fig. 2A). More genes were down regulated ( $n=310$ ) by a  
178 magnitude of 2-fold or higher, relative to those up regulated ( $n=75$ ), upon the loss of BRG1



179 (Fig. 2A). Nearly half of these differentially regulated genes were associated with BRG1  
180 peaks (P12 peaks). The down regulated genes appear normally expressed in gonadal  
181 tissue and the nervous system and were enriched for Gene ontology (GO) terms relevant  
182 to meiotic processes (Fig. 2B). In contrast, the up regulated genes are normally expressed  
183 in limb and muscle and were enriched for GO terms relevant to somatic developmental  
184 processes (Fig. 2B). Thus, BRG1 coordinates germ line transcription by activating meiotic  
185 genes while concomitantly repressing somatic genes. Since BRG1 is essential for meiotic  
186 progression (Kim et al., 2012), we monitored the expression of genes associated with  
187 abnormal spermatogonia proliferation and meiotic arrest phenotypes, curated from the  
188 mouse genome database (Blake et al., 2003). We generated a heatmap displaying z-  
189 scores associated with transcript abundance of each candidate gene, measured across  
190 P12 *Brg1*<sup>WT</sup> and *Brg1*<sup>ckO</sup> replicates (Fig. 2C). With the exception of *Androgen receptor*  
191 (*Ar*) and *Microtubule associated protein 7 (Map7)*, all other germ cell factors appeared  
192 less abundant upon the loss of BRG1 (Fig. 2C). Next, we adopted a reverse genetic  
193 approach to test whether the mis-expression of candidate genes were associated with  
194 specific phenotypes in the *Brg1*<sup>ckO</sup>. To do this we choose a pre-meiotic candidate, *Zbtb16*  
195 and meiotic candidate, *Sycp2*.

196

197 *Zbtb16* is essential for the maintenance of a pool of undifferentiated typeA spermatogonia  
198 (SpgA) (Buaas et al., 2004). While BRG1 is dispensable for the establishment of  
199 spermatogonia, its role in SpgA maintenance remains unknown (Kim et al., 2012). We  
200 quantified the number of SpgA in P10 *Brg1*<sup>WT</sup> and *Brg1*<sup>ckO</sup> testes cryosections by  
201 immunostaining for ZBTB16. The *Brg1*<sup>ckO</sup> testes contain 46% fewer SpgA, when  
202 compared to *Brg1*<sup>WT</sup> testes (Fig. 2D). To validate the transcriptional basis of this defect,  
203 we performed qRT-PCR to determine the expression of *Zbtb16* in purified, THY1+  
204 spermatogonia (enriched for spgA) isolated from P8 *Brg1*<sup>WT</sup>, *Brg1*<sup>Het</sup> (*Brg1*<sup>fl/+</sup>; *Mvh-cre*<sup>Tg/0</sup>)  
205 and *Brg1*<sup>ckO</sup> testes. We also monitored the expression of other established stem cell  
206 factors such as, *Inhibitor of DNA binding 4 (Id4)*, *POU domain, class 5, transcription factor*  
207 *1 (Pou5f1*, also known as *Oct4*), *POU domain, class 3, transcription factor 1 (Pou3f1*, also  
208 *known as Oct6)* and *Forkhead box O1 (Foxo1)* (Dann et al., 2008; Goertz et al., 2011;  
209 Oatley et al., 2011; Wu et al., 2010). Transcripts associated with *Zbtb16*, *Id4* and *Pou5f1*  
210 were down-regulated upon the loss of BRG1 in the purified THY1+ fractions (Fig. S2B).  
211 The fact that *Thy1* mRNA levels remain abundant argues against a loss of spermatogonia

212 cells early in development (Fig. S2B). Thus, BRG1 regulates the maintenance of  
213 undifferentiated spermatogonial cells by activating the expression of critical stem cell  
214 factors.

215

216 The meiotic gene candidate, *Sycp2*, constitutes the structural component of the lateral  
217 element of meiotic chromosomal axes and is essential for synapsis (Yang et al., 2006).  
218 Coincidentally, *Brg1<sup>ckO</sup>* spermatocytes display an increase in asynapsis (Kim et al., 2012).  
219 In the *Brg1<sup>ckO</sup>*, SCYP2 levels are distinctly lower relative to the controls (Fig. 2E, Fig. S2C)  
220 and abnormally assemble into short lateral filaments and aggregates in 37% of the mutant  
221 zygotene spermatocytes (total scored=212) (Fig. 2F, Fig. S2D). While  
222 *Sycp2<sup>-/-</sup>* spermatocytes fail to form SYCP3 elements, we did not observe a similar defect  
223 in the *Brg1<sup>ckO</sup>* spermatocytes (Fig. S2D) (Yang et al., 2006). We reason that the reduced  
224 levels of SYCP2 might be sufficient to facilitate apparently normal SYCP3 assembly. Thus,  
225 a paucity in SYCP2 may limit meiotic progression by potentially compromising the  
226 formation of a functional synaptonemal complex. In addition to the mis-regulation of  
227 essential germ cell factors, we also identified a significant increase in the expression of  
228 several somatic genes in the *Brg1<sup>ckO</sup>* (Table S1). *Pdgfra* a signaling receptor, generally  
229 associated with somatic (Basciani et al., 2018; Schmahl et al., 2008) and pre-meiotic  
230 spermatogonia (Hammoud et al., 2014), was up-regulated by more than 2-fold over a  
231 period spanning meiosis-I in the *Brg1<sup>ckO</sup>* (Fig. S2E).

232

233

234

### 235 **BRG1 is required to maintain chromatin accessibility at promoters**

236 Chromatin remodelers reposition nucleosomes, consequently regulating accessibility to  
237 transcription factors. Thus BRG1 might influence transcription by modulating the structure  
238 of the germ line epigenome. To investigate this, we performed Assay for Transposase-  
239 Accessible Chromatin (ATAC)-seq to map open chromatin in pre-pachytene and  
240 pachytene spermatogenic cells isolated from P12 and P18 testes respectively. Similar to  
241 the RNA-seq data, we surveyed differences in chromatin accessibility between P12  
242 *Brg1<sup>WT</sup>* and *Brg1<sup>ckO</sup>* testes (Fig. S3A, left panel). Since P18 *Brg1<sup>ckO</sup>* testes are  
243 characterized by severe pachytene arrest, we compared chromatin accessibility between  
244 P18 *Brg1<sup>WT</sup>* and *Brg1<sup>Het</sup>* (*Brg1<sup>fl/Δ</sup>*) testes (Fig. S3A, right panel). In normal spermatogenic

245 cells, strong ATAC read coverage was detected promoter proximally at both P12 and P18  
246 (Fig. S3A). This promoter accessibility is significantly diminished in P12 *Brg1<sup>ckO</sup>* testes  
247 and also under conditions of haploinsufficiency in P18 *Brg1<sup>Het</sup>* testes (FigS3A).

248

249 Since promoter proximal chromatin responds to the loss of BRG1, we first monitored the  
250 changes in chromatin accessibility at promoters of target genes differentially regulated by  
251 BRG1 (Fig. 3A). Promoters of BRG1 target genes that are normally activated (down  
252 regulated upon BRG1 loss), display a significant decrease in promoter accessibility in the  
253 *Brg1<sup>ckO</sup>* relative to *Brg1<sup>WT</sup>* testes. While the promoters of repressed gene targets (up  
254 regulated upon BRG1 loss) are less accessible relative to their activated counterparts in  
255 *Brg1<sup>WT</sup>* testes, their accessibility appears further reduced in the *Brg1<sup>ckO</sup>* testes, albeit at  
256 levels that fail to meet statistical significance (Fig. 3A). Thus only activated gene promoters  
257 experience a significant change in accessibility.

258

259 To identify genome-wide changes in chromatin accessibility at P12, we performed edgeR  
260 on the ATAC read counts obtained from wild type and mutant samples. The vast majority  
261 of regions that displayed significant differences in chromatin accessibility appear less  
262 accessible (Closed; n= 549), leaving only a few regions that acquire greater accessibility  
263 (Opened; n= 99) upon the loss of BRG1 at P12 (Fig. 3B). Consistent with the general  
264 decrease in promoter accessibility in the *Brg1<sup>ckO</sup>* (Fig. S3A), the closed regions are  
265 overwhelmingly associated with promoters (Fig. 3C, Fig. S3B; panel 1). In contrast, the  
266 opened regions were prominently featured within introns and intergenic regions (Fig. 3C,  
267 Fig. S3B, panel 2 & 3). This overall decrease in chromatin accessibility genome-wide is  
268 consistent with the previously observed increase in repressive epigenetic modifications in  
269 *Brg1<sup>ckO</sup>* spermatocytes (Kim et al., 2012). The genes associated with closed promoters in  
270 *Brg1<sup>ckO</sup>* testes were mostly meiotic in function (Fig. 3D, Table S2). Thus BRG1 probably  
271 activates meiotic genes by maintaining chromatin accessibility at cognate promoters. In  
272 contrast a few genes associated with the distal sites that appear more accessible in the  
273 *Brg1<sup>ckO</sup>* testes, represent somatic factors (Fig. 3D, Table S2).

274

275

276 **BRG1 physically interacts with SCML2, a non-canonical PRC1 factor**

277 To investigate further mechanisms governing SWI/SNF mediated epigenetic regulation,  
278 we monitored BRG1 interactions in testes nuclear extracts from 3-week-old mice by  
279 performing Immuno-pulldowns (IP) (Fig. 4A). Proteins isolated from a BRG1 IP and control  
280 nonspecific (ns) IgG pulldown were identified by mass spectrometry (MS). Known  
281 SWI/SNF sub-units were specifically identified in the BRG1 IP, thus demonstrating the  
282 efficacy of our method (Fig. 4A, Fig. S4A). Furthermore the presence of both SWI/SNF  
283 sub complexes; *Brahma* Associated Factor (BAF) and *polybromo*-BAF (PBAF) are  
284 detected in the germ line (Fig. 4A, Fig. S4A) (reviewed in Masliah-Planchon et al., 2015).  
285 More interestingly we identified peptides associated with SCML2, a known testes specific  
286 PRC1 factor (Hasegawa et al., 2015; Luo et al., 2015) (Fig. 4A). Since candidate peptides  
287 were also detected in the non-specific IgG IP, we validated these interactions by  
288 performing a reverse IP with an antibody against SCML2 (Fig. 4B). The IP was conducted  
289 on nuclear lysates treated with universal nuclease (benzonase) to eliminate non-specific,  
290 DNA mediated interactions. BRG1 was specifically detected in the SCML2 IP, compared  
291 to nslgG (Fig. 4B, lane 2 & 3). Additionally, a previously established interaction between  
292 SCML2 and RNF2 was validated (Fig. 4B, lane 3) (Hasegawa et al., 2015). A smear like  
293 appearance of SCML2 in the nuclear extracts (Fig 4B) prompted us to confirm the  
294 specificity of the SCML2 antibody. We did this by performing western blots on nuclear  
295 extracts obtained from spermatogenic cells and ovaries. Consistent with its male specific  
296 expression pattern, we fail to detect a SCML2 signal in nuclear extracts obtained from  
297 ovaries (Fig. S4B, lane 2). Hence the smearing might be a product of protein instability or  
298 indicative of isoforms.

299

300 In pachytene spermatocytes, SCML2 is also known to interact with USP7, a known  
301 deubiquitinase and non-canonical member of the mammalian PRC1.4 complex (Lecona  
302 et al., 2015; Luo et al., 2015). Despite this association, USP7 does not interact directly  
303 with BRG1 (Fig. S4C, lane 2-4). Thus BRG1 only associates with SCML2 during meiosis.

304

305

### 306 **BRG1 and SCML2 concordantly regulate genes during meiosis**

307 In pachytene spermatocytes, SCML2 is known to repress somatic and spermatogonial  
308 genes, while concurrently activating certain meiotic and late spermatogenic genes  
309 (Hasegawa et al., 2015). This is similar to the epigenetic role of BRG1 in the germ line.

310 Hence it might be possible that BRG1 interacts with SCML2 to mutually regulate the germ  
311 line transcriptome. In support of such a possibility, we identified robust enrichment of  
312 BRG1 at TSS's of genes differentially regulated (FDR < 0.05) by SCML2, during  
313 pachynema (Fig. 4C). The relative enrichment was greater at P12 (8 fold over input)  
314 compared to P18 (6 fold over input), indicating that BRG1 localizes prior to pachytene at  
315 this sites. Furthermore, chromatin accessibility at TSS's associated with SCML2 regulated  
316 genes is reduced upon the loss of BRG1 at P12 (Fig. S5A).

317 Next, we looked for commonly mis-expressed genes (FDR<0.05) between the P12 BRG1  
318 and pachytene SCML2 RNA-seq data. About 65% (n=597) of genes commonly mis-  
319 expressed in the absence of either BRG1 or SCML2 exhibited concordant expression  
320 changes that were highly correlated ( $r^2=0.72$ ). The remaining 35% (n=330) showed  
321 discordant changes ( $r^2=0.51$ ) (Fig. 4D). Of the concordantly regulated genes, 64% (n=388)  
322 were repressed, while the remainder (n=209) were activated. The concordantly repressed  
323 genes accounted for 40% of the genes up-regulated in the P12 *Brg1<sup>cko</sup>* testes. In contrast,  
324 only 19% of genes down regulated in the P12 *Brg1<sup>cko</sup>* testes overlapped with concordantly  
325 activated genes. The commonly repressed genes were mostly somatic in function (Fig.  
326 S5B) and included the somatic signaling receptor, PDGFRA, associated with BRG1 (Fig.  
327 S1C, Fig. S2E). Thus during normal prophase-I, BRG1 might achieve gene repression by  
328 recruiting SCML2. On the other hand the co-activated genes were associated with GO  
329 terms relevant to the mitotic spindle checkpoint (Fig S5B). Evidence for such checkpoint  
330 mechanisms have been reported late in meiosis (Eaker et al., 2001; Lee et al., 2011).

331

332

### 333 **BRG1 influences SCML2 and USP7 localization to the sex body**

334 During pachynema, both SCML2 and its interacting partner, USP7 paint the sex body, a  
335  $\gamma$ H2Ax enriched, sub-nuclear compartment containing the sex linked chromosomes  
336 (Hasegawa et al., 2015; Luo et al., 2015). Therefore we determined whether SCML2  
337 localization to the sex body was dependent on BRG1.

338

339 We first compared SCML2 localization in *Brg1<sup>WT</sup>* and *Brg1<sup>cko</sup>* testes cryo-sections from  
340 2- and 3-week-old males by IF (Fig. 5A, Fig. S6A). Mutant pachytene spermatocytes were  
341 identified by staining for  $\gamma$ H2Ax, given that its association with the sex body remains

342 unperturbed in the *Brg1<sup>ckO</sup>* (Kim et al., 2012). The loss of BRG1 appeared to impact the  
343 localization of SCML2 in *Brg1<sup>ckO</sup>* pachytene spermatocytes (Fig. 5A). Here, SCML2  
344 appeared abnormally distributed genome-wide, without normally accumulating on the sex  
345 body (Fig. 5A, panel 3 insets). We confirmed these defects, by co-staining for ATR (Ataxia  
346 Telangiectasia and Rad3 Related), a DDR factor enriched on the sex body (Royo et al.,  
347 2013) and also stained for BRG1, to demonstrate protein loss in mutant pachytene  
348 spermatocytes (Fig. S6A). Given that SCML2 physically associates with  $\gamma$ H2Ax  
349 (Hasegawa et al., 2015; Luo et al., 2015), it may be possible that SCML2 localizes to  
350 autosomal sites harboring persistent  $\gamma$ H2Ax in *Brg1<sup>ckO</sup>* spermatocytes (Fig 5A, panel  
351 insets). Surprisingly, subtle defects in SCML2 localization were also seen in *Brg1<sup>Het</sup>*  
352 pachytene spermatocytes, where it appeared more homogenously distributed genome-  
353 wide (Fig. S6B, panel insets).

354

355 We next examined SCML2 localization in *Brg1<sup>WT</sup>* and *Brg1<sup>ckO</sup>* meiotic spreads, co-stained  
356 with a synaptonemal complex marker, SYCP3, to visualize chromosomes. Mutant meiotic  
357 spreads were obtained from *Brg1<sup>ckO</sup>* testes generated using two independent germ line  
358 specific CRE's, namely the *Mvh-cre* and *Stra8-cre*. Similar to the cryosections, SCML2  
359 association with the sex chromosomes was perturbed in *Brg1<sup>ckO</sup>* pachytene spreads (Fig.  
360 S7). However, the phenotype appeared less severe in *Brg1<sup>ckO</sup>* pachytene spermatocytes  
361 generated with *Stra8-cre*, relative to *Mvh-cre* (Fig. S7). Such differences might be a  
362 consequence of the distinct temporal activity of each CRE (see materials and methods)  
363 (Gallardo et al., 2007; Sadate-Ngatchou et al., 2008).

364

365 In addition to SCML2 we also monitored the localization of USP7 in pachytene  
366 spermatocytes obtained from *Brg1<sup>WT</sup>* and *Brg1<sup>ckO</sup>* testes. Even though BRG1 does not  
367 directly interact with USP7 (Fig. S4C), we posited that the mis-localization of SCML2 in  
368 *Brg1<sup>ckO</sup>* pachytene spermatocytes might affect USP7 enrichment on the sex body. In fact  
369 this seems to be the case in *Brg1<sup>ckO</sup>* pachytene spermatocytes immunofluorescently  
370 stained for USP7 and  $\gamma$ H2Ax (Fig. 5B).

371

372 From previous studies it is clear that the mis localization of SCML2 does not affect  
373 processes, critical to the initiation of meiotic sex chromosome inactivation (MSCI)  
374 (Hasegawa et al., 2015). Since the loss of BRG1 has been previously reported to influence

375 MSCI (Wang et al., 2012), we examined its impact on the localization of known MSCI  
376 factors such as BRCA1, ATR and MDC1 to the sex body (Ichijima et al., 2011; Turner et  
377 al., 2004). By immunofluorescence, BRCA1, ATR and MDC1 appeared stably associated  
378 with the sex body in *Brg1<sup>ckO</sup>* pachytene spermatocytes (Fig. 5C). Thus BRG1 like SCML2  
379 does not affect the initiation of MSCI. Interestingly, it was previously reported that the loss  
380 of MDC1 abrogates SCML2 recruitment to the sex chromosomes (Hasegawa et al., 2015).  
381 Therefore, the stable association of MDC1 with the sex body in *Brg1<sup>ckO</sup>* spermatocytes  
382 (Fig. 5C), suggests that SWI/SNF may function downstream MDC1 in the recruitment of  
383 SCML2 to the sex body.

384

385

386

### 387 **BRG1 influences the abundance of SCML2 associated histone modifications**

388 Since SCML2 is known to regulate both H2AK119ub1 and H3K27ac during meiosis  
389 (Adams et al., 2018; Hasegawa et al., 2015), we investigated whether they are also  
390 affected by BRG1. We monitored the abundance of H2AK119ub1 and H3K27ac in acid  
391 extracts obtained from P12 *Brg1<sup>WT</sup>*, *Brg1<sup>Het</sup>* and *Brg1<sup>ckO</sup>* spermatogenic nuclei (Fig. 6A,  
392 top panel). We also examined the abundance of H3K4me3 and H3K27me3 which are  
393 associated with BRG1 target promoters (Fig. 6A, bottom panel). While neither H3K4me3  
394 nor H3K27me3 levels were perturbed, both H2AK119ub1 and H3K27ac were dramatically  
395 elevated in P12 *Brg1<sup>Het</sup>* and *Brg1<sup>ckO</sup>*, relative to the *Brg1<sup>WT</sup>* spermatogenic cells (Fig. 6A,  
396 top panel). Interestingly, these epigenetic perturbations were undetectable at P8 and P10,  
397 which coincide with the initiation of meiosis and pairing (Leptonema to zygonema) (Fig.  
398 S8A). Thus BRG1 suppresses H2AK119ub1 and H3K27ac prior to the onset of  
399 pachynema. The dose dependency of such epigenetic regulation, prompted us to verify  
400 whether it was a consequence of the *Brg1* hypomorph or due to the mere presence of the  
401 *Mvh-cre*. The former scenario appears true, as evidenced by lack of any difference in the  
402 levels of H2AK119ub1, between males with the CRE and their littermate control (Fig.  
403 S8B). Another cause for concern was that, the H2AK119ub1 antibody (clone E6C5) used  
404 in this study was recently reported to recognize non-histone epitopes (Hasegawa et al.,  
405 2015). Hence, we validated the specificity of clone E6C5 by performing western blots on  
406 acid-extracted histones obtained from RNF2 (PRC1 E3-ubiquitin ligase) knock out  
407 (*Rnf2<sup>ckO</sup>*) embryonic stem (ES) cells, engineered using CRISPR-CAS9. The near-

408 absence of H2AK119ub1 signal in the *Rnf2<sup>KO</sup>* relative to *Rnf2<sup>WT</sup>* ES cell histone extracts  
409 confirms the specificity of clone E6C5 (Fig. S8C). Furthermore, H2AK119ub1 is clearly  
410 detected in chromatin fractions obtained from P12 *Brg1<sup>WT</sup>*, *Brg1<sup>Het</sup>* and *Brg1<sup>cKO</sup>* testes  
411 (Fig. S8D). Thus the changes in H2AK119ub1 reported here are genuine.

412

413

414

### 415 **BRG1 suppresses H2AK119ub1 and enhances H3K27ac at target promoters**

416 Based on the genome-wide increase in H2AK119ub1 and H3K27ac in *Brg1<sup>cKO</sup>* testes, we  
417 decided to survey the changes in these marks at promoters usually occupied by BRG1  
418 (P12 peaks) by ChIP-seq in P12 *Brg1<sup>WT</sup>* and *Brg1<sup>cKO</sup>* spermatogenic cells. First, we  
419 categorized the BRG1 targets by their chromosomal location, the rationale being that both  
420 H2AK119ub1 and H3K27ac are known to be differentially regulated between the  
421 autosomes and sex chromosomes at pachynema (Adams et al., 2018). The BRG1 target  
422 promoters displayed contrasting changes in H2AK119ub1 and H3K27ac enrichment in the  
423 *Brg1<sup>cKO</sup>* spermatogenic cells. Irrespective of chromosomal location, target promoters  
424 displayed enhanced H2AK119ub1 combined with reduced H3K27ac in the *Brg1<sup>cKO</sup>* relative  
425 to *Brg1<sup>WT</sup>* spermatogenic cells (Fig. 6B, top panel). This mirrors the changes in  
426 H2AK119ub1 and H3K27ac that occur on the sex chromosomes in *Scml2<sup>KO</sup>* pachytene  
427 spermatocytes (Adams et al., 2018; Hasegawa et al., 2015). Thus, the regulation of  
428 H2AK119ub1 and H3K27ac at regions occupied by BRG1 may be influenced by SCML2,  
429 with which it is physically associated.

430

431 Next, we analyzed the changes in H2AK119ub1 and H3K27ac at promoters of BRG1  
432 target genes that are differentially expressed. We hypothesized that these epigenetic  
433 modifications might dictate the transcriptional status of associated genes. Consistent with  
434 changes observed at all BRG1 occupied promoters (Fig. 6B, top panel), H2AK119ub1 was  
435 elevated while H3K27ac was reduced at promoters of mis-expressed target genes,  
436 irrespective of their transcriptional status in the *Brg1<sup>cKO</sup>* relative to *Brg1<sup>WT</sup>* spermatogenic  
437 cells (Fig. 6B, bottom panel). These epigenetic changes are typically associated with gene  
438 repression and thus only account for the silencing of mis-expressed genes in *Brg1<sup>cKO</sup>*  
439 spermatogenic cells. Therefore, the activation of mis-expressed target genes occurs by  
440 mechanisms independent of H2AK119ub1 or H3K27ac.



441

442 The loss of H3K27ac at promoters normally occupied by BRG1 in *Brg1<sup>ckO</sup>* spermatogenic  
443 cells is inconsistent with its genome-wide increase (Fig.6A; top panel , Fig. 6B). To  
444 determine whether other genomic regions acquire greater H3K27ac enrichment upon the  
445 loss of BRG1, we performed a differential peak calling analysis using the macs2 bdgdiff  
446 algorithm (Zhang et al., 2008). This analysis revealed several intronic and intergenic  
447 regions that lost, gained or maintained (common) H3K27ac peaks in *Brg1<sup>ckO</sup>* relative to  
448 the *Brg1<sup>WT</sup>* spermatogenic cells (Fig 6C; left panel, Fig. S9). Compared to the common  
449 peaks, regions that loose or gain H3K27ac are normally depleted of BRG1 (Fig. 6C, right  
450 panel). Thus while total H3K27ac levels are elevated, its local distribution appears more  
451 heterogeneous upon the loss of BRG1.

452

453

454

#### 455 **BRG1 can also influence the epigenome in a SCML2 independent manner**

456 While our data suggest that BRG1 regulates H2AK119ub1 and H3K27ac, through its  
457 interaction with SCML2, we cannot rule out the possibility that BRG1 might also influence  
458 these histone modifications by directly regulating the expression of cognate epigenetic  
459 modifiers. In fact, our ChIP-seq data identifies BRG1 peaks at promoters of epigenetic  
460 modifiers known to influence H2AK119ub1, H2BK120ub1 and H3K27ac (Fig. S10A).  
461 These include the H2A ubiquitin ligase, RNF2 (Wang et al., 2004), USP3 a H2A/H2B  
462 deubiquitinase (Nicassio et al., 2007) and the histone deacetylases, HDAC1 and HDAC2  
463 (Gallinari et al., 2007) (Fig. S10A). The transcript abundances of all these targets are  
464 significantly altered in response to the loss of BRG1 (Fig.S10B).

465

466 In the case of the histone ubiquitin modifiers, *Rnf2* and *Usp3*, the former displayed an  
467 increase while the latter displayed a decrease in transcript abundance in *Brg1<sup>ckO</sup>* relative  
468 to the *Brg1<sup>WT</sup>* spermatogenic cells at P12 (Fig. S10B, row 1). This is consistent with  
469 significant increases in protein levels in *Brg1<sup>ckO</sup>* (RNF2: 88% increase, USP3:59%  
470 decrease) relative to the *Brg1<sup>WT</sup>* chromatin fractions prepared from testes (Fig. 6D, lane  
471 4-6). Thus BRG1 may influence H2AK119ub1 by maintaining a balanced expression of  
472 RNF2 and USP3. Furthermore this represents an SCML2 independent mechanism of  
473 epigenetic regulation. Since USP3 has also been associated with mono ubiquitylated

474 H2B (Nicassio et al., 2007), we monitored the levels of mono ubiquitination of H2B lysine  
475 120 (H2BK120ub1), a mark associated with gene activation and chromatin relaxation  
476 (Fierz et al., 2011; Minsky et al., 2008; Pavri et al., 2006). At P12, H2BK120ub1 appeared  
477 elevated genome-wide in *Brg1<sup>ckO</sup>*, relative to *Brg1<sup>WT</sup>* spermatogenic cells (Fig. S10C). The  
478 changes in the *Brg1<sup>Het</sup>* spermatogenic cells appear to be a product of unequal protein  
479 loading.

480

481 Similar to the histone ubiquitin modifiers, H3K27ac associated modifiers, *Hdac1* and  
482 *Hdac2* displayed reduced transcript abundance in the *Brg1<sup>Het</sup>* and *Brg1<sup>ckO</sup>* (Fig. S10B,  
483 row 2). At least in the case of *Hdac1*, we were unable to identify a corresponding depletion  
484 in protein levels by western blot (Fig. 6D, lane 1-6). Since HDAC1 has been shown to  
485 compensate for HDAC2 in various developmental scenarios (Ma et al., 2012; Montgomery  
486 et al., 2009; Yamaguchi et al., 2010) it is unlikely that the perturbation in H3K27ac levels  
487 in the *Brg1<sup>ckO</sup>* spermatogenic cells, occurs via mis-expression of HDAC1/2.

488

489 **Discussion:**

490

491 In this study we integrate genomic and proteomic approaches to show that SWI/SNF  
492 directed regulation of transcription, influences meiotic progression in males. In  
493 spermatogenic cells, BRG1 is overwhelmingly promoter associated which is distinct from  
494 what has been observed in other mammalian cell types and embryonic tissue (Alexander  
495 et al., 2015; Alver et al., 2017; Attanasio et al., 2014). This re-enforces the notion that cell  
496 or tissue specific associations influence SWI/SNF function during development (reviewed  
497 in Ho and Crabtree 2010). We propose a model in which the SWI/SNF ATPase, activates  
498 essential spermatogenic genes, while maintaining the repression of somatic genes. We  
499 show that BRG1 facilitates promoter accessibility of differentially regulated genes, which  
500 is consistent with the generally accepted mechanism of SWI/SNF (reviewed in Clapier et  
501 al., 2017). The activated genes play critical roles in the maintenance of undifferentiated  
502 spermatogonial cell populations and facilitate meiotic progression. Target stem cell factors  
503 include, *Zbtb16* and *Id4*. The latter specifically identifies spermatogonial stem cells (SSC)  
504 (Green et al., 2018; Oatley et al., 2011). The influence of BRG1 on SSC maintenance thus  
505 demonstrates a conserved role for SWI/SNF across various stem cell lineages (Ho et al.,  
506 2009; Lessard et al., 2007) . The regulation of *Sycp2*, which is associated with  
507 synaptonemal complex assembly and homolog synapsis (Yang et al., 2006), potentially  
508 explains the incomplete synapsis and subsequent meiotic arrest seen in *Brg1<sup>ckO</sup>*  
509 spermatocytes (Kim et al., 2012). Thus the male sterility associated with *Brg1<sup>ckO</sup>* adults is  
510 a consequence of a shortage of germ line progenitors and essential meiotic factors.

511

512 The repression of the somatic transcriptome during meiosis is a feature shared with two  
513 other epigenetic regulators, namely, PRC2 and SCML2, a testes specific PRC1 factor  
514 (Hasegawa et al., 2015; Mu et al., 2014). Here we propose that BRG1 achieves the  
515 repression of its target genes by recruiting SCML2 activity. This is supported by the  
516 following observations; BRG1 (i) physically interacts with SCML2, (ii) is enriched at the  
517 promoters of genes regulated by SCML2 (iii) concordantly represses most genes  
518 commonly regulated by SCML2 and (iv) influences SCML2 localization during pachynema,  
519 based on a pronounced effect on sex body association. Interestingly, the transition to  
520 pachynema is accompanied by a reduction but not depletion of BRG1 from the X  
521 chromosome. This reduced level of BRG1 might be sufficient to recruit SCML2 to the sex

522 body. In contrast to the repressed genes, BRG1 concordantly activates fewer SCML2  
523 regulated genes. Most of these are associated with the regulation of mitotic spindle  
524 checkpoints, which in the context of meiosis occurs late into meiosis-I (Eaker et al., 2001).

525

526 In addition to these observations, BRG1 also appears to influence known SCML2 histone  
527 modifications, H2AK119ub1 and H3K27ac (Adams et al., 2018; Hasegawa et al., 2015).  
528 However unlike SCML2, BRG1 does not appear to differentially regulate autosomal and  
529 sex linked chromatin (Hasegawa et al., 2015). It is possible that such differential regulation  
530 does not manifest at pre pachytene stages. Alternatively, this may be indicative of distinct  
531 epigenetic outcomes associated with SCML2 dependent and independent mechanisms.  
532 The latter is demonstrated by the effect of BRG1 on the expression of potent H2AK119ub1  
533 modifiers, such as RNF2 and USP3.

534

535 As counter-intuitive as it may seem, repressed BRG1 targets genes are associated with  
536 low H2AK119ub1 and higher H3K27ac levels. Hence, the repression of target genes  
537 probably occurs by alternative mechanisms. One possibility is that these targets are  
538 silenced by the formation of bivalent promoters (H3K4me3/H43K27me3), typically  
539 associated with somatic developmental genes in the germ line (Hammoud et al., 2014;  
540 Lesch et al., 2013; Lesch et al., 2016). In fact 1/3<sup>rd</sup> of BRG1 associated TSS's appear  
541 bivalently modified from P12 to P17. Interestingly, SCML2 has been recently shown to  
542 influence the formation of bivalent domains during germ line development (Maezawa et  
543 al., 2018). Hence, such SCML2 activity might potentially govern the repression of BRG1  
544 target genes.

545

546 In addition to H2AK119ub1, BRG1 also suppresses H2BK120ub1, which is associated  
547 with transcriptional activation and chromatin relaxation (Fierz et al., 2011; Minsky et al.,  
548 2008; Pavri et al., 2006). Hence, an increase in H2BK120ub1 might potentially de-repress  
549 genes in *Brg1<sup>ckO</sup>* spermatogenic cells. This might occur due to the mis-regulation of USP3  
550 or mis-localization of USP7, two deubiquitinases, whose activities have been associated  
551 with H2BK120ub1 (Nicassio et al., 2007; Van Der Knaap et al., 2005). The evidence for  
552 USP7 is based on its function in *Drosophila* (Van Der Knaap et al., 2005). In contrast,  
553 mammalian USP7 appears to influence H2BK120ub1 in a catalytically independent  
554 manner (Lecona et al., 2015; Maertens et al., 2010, Huether et al., 2014).

555

556 In conclusion we reveal the transcriptional basis for the meiotic defects previously  
557 described in *Brg1<sup>ckO</sup>* males, and present a new paradigm for studying co-operation  
558 between SWI/SNF and PRC1 factors in the regulation of the epigenome. While recent  
559 studies have illustrated the propensity of BRG1 to evict canonical PRC1 members from  
560 chromatin in normal and oncogenic cell culture models (Kadoch et al., 2016; Stanton et  
561 al., 2016), the relationship between SWI/SNF and variant PRC1 factors remain  
562 unexplored.

563

564

565

566

567

568

569

570

571

572

573

574

575

576

577

578

579

580 **Acknowledgements**

581 We thank Magnuson lab members for helpful comments on manuscript  
582 preparation. This work was supported by National Institutes of Health grants  
583 R01GM101974 and U42OD010924.

584

585

586 **Competing interests statement**

587 The authors declare no competing financial interests.

588

589 **Data availability:**

590 Raw and processed data are deposited with GEO (GSE119179, for access, please enter  
591 token number: wjyxqkgozrgrpir).

592

610 **Materials and Methods:**

611

612 **Generation of *Brg1* conditional deletion and genotyping:**

613 *Brg1* floxed (Sumi-Ichinose et al., 1997) , *Mvh-Cre* (activated at ~ E15) (Gallardo et al., 2007) and  
614 *Stra8-Cre* (activated only in males at P3) (Sadate-Ngatchou et al., 2008) were maintained on a  
615 outbred background genetic background using CD-1 mice. *Brg1<sup>fl/fl</sup>* females were crossed to  
616 *Brg1<sup>fl/+</sup>;Mvh-Cre<sup>Tg/0</sup>* males to obtain *Brg1<sup>flΔ</sup>;Mvh-Cre<sup>Tg/0</sup>* (*Brg1<sup>CKO</sup>*) , *Brg1<sup>fl/+</sup>;Mvh-Cre<sup>Tg/0</sup>* (*Brg1<sup>Het</sup>*)  
617 and *Brg1<sup>fl/+</sup>* (*Brg1<sup>WT</sup>*) littermate controls. Similar crosses were made to generate the *Stra8-Cre*  
618 induced conditional knockouts and littermate controls. Genotyping primers used in this study  
619 include: *Brg1<sup>fl/+</sup>* alleles - (F)- 5' -CCTAGCCAAGGTAGCGTGTCTCAT-3' ; (R) 5' -  
620 CCAGGACCACATACAAGGCCTTGTCT-3', the excised allele ( $\Delta$ )- reverse primer used above in  
621 combination with (F) 5' -CTAACCGTGTATGTAGCCAGTTCTGCCT-3', *Mvh-Cre* - (F) 5' -  
622 CACGTGCAGCCGTTTAAGCCGCGT-3', (R) 5' -TTCCATTCTAAACAACACCCTGAA-3' and  
623 *Stra8-Cre* - (F) 5' -GTGCAAGCTGAACAACAGGA-3', (R) 5' -AGGGACACAGCATTGGAGTC-3'.  
624 All animal work was carried out in accordance with approved IACUC protocols at the University  
625 of North Carolina at Chapel Hill.

626

627 **Disruption of *Rnf2* by CRISPR-Cas9:**

628 The sequences of sgRNAs for *Rnf2* are 5'CACCGTGTTTACATCGGTTTTGCG3' and  
629 5'AAACCGCAAACCGATGTAAACAC3'. sgRNAs were cloned into pX330-U6-Chimeric\_BB-  
630 CBh-hSpCas9 (42230, Addgene) using Golden Gate assembly cloning strategy (Bauer et al.,  
631 2015). Briefly, 5 x 10<sup>4</sup> E14 ES cells were cultured on 60 mm dishes for one day and then  
632 transfected with plasmids expressing Cas9 and sgRNAs, along with a plasmid expressing PGK-  
633 PuroR (Addgene, cat. no. 31937) using FuGENE HD reagent (Promega) according to the  
634 manufacturer's instructions. The cells were treated with 2  $\mu$ g/ml puromycin for two days and  
635 recovered in normal culture medium until ES cell colonies grew up. *Ezh1* targeted colonies were  
636 verified by DNA sequencing.

637

638 **Immunofluorescence staining:**

639 Spermatocyte spreads were prepared as described (Peters et al., 1997) or by using a protocol  
640 adapted from (Wojtasz et al., 2009) , that was used to generate "3D-preserved" spermatocytes.  
641 The latter entails a detergent spreading technique in which single- cell preparations obtained as  
642 described (Biswas 2018) were treated with 0.25% NP-40 for not more than 2 minutes. These

643 spreads were used to view SYCP2 staining. All spermatocyte spreads were generated from 2- to  
644 3-week-old mice. Prepared slides were either dried down and stored at -80° C or stored in  
645 phosphate buffered saline (PBS) at 4° C in the case of “3D-preserved” spermatocytes.

646 Testis cryosections were prepared essentially as described before (Kim et al., 2012) with a few  
647 modifications. Briefly, juvenile/adult testes were fixed in 10% neutral buffered formalin at 4°C.  
648 After 20 minutes of incubation in NBF the tissue was sliced into half and then fixed up to 1 hour.  
649 Fixed tissue were washed 3 times in PBS at room temperature and then saturated through a  
650 sucrose series - 10% (30 min), 20% (30 min) and 30% (1 hr). The tissue were then incubated  
651 overnight in 30% sucrose/optimum cutting temperature (OCT) formulation at 4° C and  
652 subsequently embedded in OCT. Frozen sections were cut at 9 µm thickness. Antigen retrieval  
653 was performed for all antibodies used in this study. Briefly slides were incubated in boiling 10mM  
654 citric acid (pH6.0) for 10 minutes. Over this period, citrate buffer was replaced every 2 minutes  
655 with fresh boiling buffer and then allowed to cool down gradually for up to 20 minutes.

656 Tissue section and spreads were washed in PBS followed by permeabilization in 0.1% Triton-X  
657 100 and then blocked in Antibody dilution buffer (10% bovine serum albumin; 10% goat/donkey  
658 serum; 0.05% Triton-X 100) diluted 1:10 in PBS for 20 minutes before incubation with primary  
659 antibody overnight at 4°C. The following day, samples were again washed, permeabilized and  
660 blocked in ADB/PBS after which they were incubated for 1 hour with Alexa fluor- conjugated  
661 secondary antibodies. Immuno-stained slides were finally washed twice in PBS/0.32% photoflo  
662 (Kodak), once in H<sub>2</sub>O/ 0.32% photoflo and then counterstained with DAPI before mounting in  
663 Prolong Gold antifade medium (P-36931; Life Technologies). A list of all the primary antibodies  
664 used in this study are provided (Table S4). We used alexa fluor conjugated secondary antibodies  
665 at a dilution of 1:500. All imaging in this study was done on a Zeiss AxioImager-M2.

666

#### 667 **Isolation of Spermatogonial stem cells and RNA extraction:**

668 Testes cell suspension was generated from 8-day-old *Brg1*<sup>WT</sup> (n=5), *Brg1*<sup>Het</sup> (n=1), *Brg1*<sup>ckO</sup> (n=2)  
669 mice as described previously (Kubota and Brinster, 2008). Conditional deletions were generated  
670 using the *Mvh-Cre* transgene. Spermatogonial stem cells (SSC) were enriched using THY1+  
671 microbeads (Miltenyi Biotec; 131-049-101) followed by their isolation on magnetic activated cell  
672 sorting (MACS) columns (Miltenyi Biotec; 131-090-312). RNA from SSC's were isolated and  
673 purified using the PicoPure™ RNA isolation kit (Life technologies; KIT0204).

674

675



676 **RT-PCR and qPCR:**

677 cDNA was synthesized using random primer mix (NEB) and ProtoScript® II reverse transcriptase  
678 (NEB). Real time qPCR was performed using Sso Fast EvaGreen supermix (Bio-Rad) on a CFX96  
679 thermocycler (Bio-Rad). A list of qRT-PCR primers used in this study are provided (Table S5).

680

681 **Isolation of spermatogenic cells:**

682 Spermatocyte enriched populations were isolated by methods described previously (Chang et al.,  
683 2011; Mu et al., 2014). Spermatocyte populations were enriched using percoll and cell strainers.  
684 Cell populations were then used for downstream applications such as RNA-seq, ATAC-seq, ChIP-  
685 seq and nuclear lysate preparations for immunoprecipitations.

686

687

688 **RNA-seq:**

689 RNA was extracted from spermatogenic cells obtained from 4 biological replicates of P12 *Brg1*<sup>WT</sup>  
690 and *Brg1*<sup>ckO</sup> mice each. Conditional deletions were generated using the *Mvh-Cre* transgene. Cells  
691 were treated with the TRIzol reagent (Invitrogen) and total RNA was isolated and cleaned up  
692 using the Direct-zol RNA kit (Zymo). Sequencing libraries were prepared using a Kapa mRNA  
693 library kit as per manufacturer's instruction and then sequenced on a Illumina HiSeq 4000 (50 bp  
694 reads, single end). Scml2 RNA-seq was previously published and is publically available under  
695 GEO accession number GSE55060 (Hasegawa et al., 2015).

696

697 **RNA-seq data analysis:**

698 Gene expression was quantified using kallisto (Bray et al., 2016). Transcript levels (counts) were  
699 summarized per gene using tximport (Soneson et al., 2016) and then imported to perform a  
700 differential analysis of gene expression using edgeR (Robinson et al., 2010). The mouse (mm9)  
701 gene/transcript annotations were retrieved using the ensembl R package  
702 (<https://github.com/jotsetung/ensemldb>). Low abundance genes (counts per million <1 across  
703 4 replicates) were filtered out in edgeR and significant differences in counts were called at a false  
704 discovery rate (FDR) ≤ 0.05. The lists of differentially expressed genes are provided (Table S1).  
705 Anatomy ontology terms were curated from EMAPA (The Edinburgh Mouse Atlas Project)  
706 (Hayamizu et al., 2013) and the analysis was done on MouseMine ([www.mousemine.org](http://www.mousemine.org))

707 (Motenko et al., 2015). Gene ontology analysis were performed using clusterProfiler (Yu et al.,  
708 2012).

709

#### 710 **ChIP-seq:**

711 BRG1 ChIP was performed exactly as described previously (Raab et al., 2015). We performed  
712 the ChIP in duplicates on  $4 \times 10^7$  wild type (CD-1) spermatogenic cells obtained from P12 and P18  
713 mice each. H2AK119ub1 and H3K27ac ChIPs were also performed in duplicate on spermatogenic  
714 cells obtained from P12 *Brg1<sup>WT</sup>* and *Brg1<sup>ckO</sup>* mice using a method described previously for low  
715 chromatin inputs (Brind'Amour et al., 2015), with minor modifications (See supplemental materials  
716 for details). The BRG1 ChIP samples were sequenced on a Hiseq 2500 using v4 chemistry (50  
717 bp reads, single end), whereas the H3K27ac and H2AK119ub1 ChIP samples were sequenced  
718 on an Illumina Hiseq 4000 (50 bp reads, single end). The antibodies used for ChIP are listed  
719 (table S4). H3K4me3, H3K27me3 ChIP-seq data were previously published and are publically  
720 available under GEO accession number GSE61902 (Mu et al., 2014). ChIP data analysis methods  
721 can be found in the supplemental materials.

722

723

#### 724 **ATAC-seq:**

725 ATAC-seq was performed on spermatogenic cells isolated from 2 biological replicates of P12  
726 *Brg1<sup>WT</sup>* and *Brg1<sup>ckO</sup>* mice each. Only a single sample from 18 day old *Brg1<sup>WT</sup>* and *Brg1<sup>Het</sup>* mice  
727 were processed for ATAC-seq. Conditional deletions were generated using the *Mvh-Cre*  
728 transgene. ATAC-seq libraries were made as previously reported (Buenrostro et al., 2013) , with  
729 the exception of a double-sided SPRI bead size selection step of each library, using 0.5x and 1x  
730 ratio of SPRI beads to obtain a library size range of ~150bp to ~2kb. All libraries were combined  
731 and sequenced on a single lane of Illumina Hiseq 2500 using v4 chemistry (50bp reads, single).

732

733

#### 734 **Preparation of nuclear lysates:**

735 Nuclear extracts were prepared from spermatocyte enriched preparations as previously described  
736 (Chandler et al., 2012; Li et al., 1991) with minor modifications. These nuclear lysates were used  
737 for co-immunoprecipitations (co-IP) and for the mass spectrometric analysis of BRG1  
738 immunopulldowns (supplemental materials).

739

740

741 **Identification of BRG1 interacting proteins by mass spectrometry:**

742 Proteins isolated from BRG1 IP and IP with a non-specific rabbit IgG were run approximately 2  
743 cm below the bottom of the well of a precast SDS polyacrylamide gel (short gel). The short gel  
744 was stained with GelCode blue protein stain (ThermoFisher) and the lanes containing each  
745 sample were cut out and analyzed by mass spectrometry at the University of Massachusetts  
746 Medical School Mass spectrometry Core Facility (see supplemental materials).

747

748

749 **Preparation of sub cellular protein fractions:**

750 Cytosolic, nucleoplasmic (soluble) and chromatin (insoluble) fractions were prepared as  
751 described (Méndez and Stillman, 2000) from spermatogenic cells obtained from P12 and P21  
752 *Brg1<sup>WT</sup>*, *Brg1<sup>Het</sup>* and *Brg1<sup>CKO</sup>* mice. Conditional deletions were generated using the *Mvh-Cre*  
753 transgene.

754

755 **Preparation of acid extracted histones:**

756 Histones were extracted from spermatogenic cells obtained from P12 *Brg1<sup>WT</sup>*, *Brg1<sup>Het</sup>* and *Brg1<sup>CKO</sup>*  
757 mice using acid extraction protocol described previously (Shechter et al., 2007). Conditional  
758 deletions were generated using the *Mvh-Cre* transgene.

759

760 **Western blotting:**

761 Protein samples were separated by polyacrylamide gel electrophoresis and then transferred to  
762 PVDF (Polyvinylidene Difluoride) membranes (Bio-Rad) using wet/ semi-dry transfer apparatus  
763 (Bio-Rad). Western blots were generated using the Li-COR Bioscience Odyssey fluorescent  
764 western blotting reagents. All the antibodies used in this study and their corresponding dilutions  
765 are listed (Table S4).

766

781 **References:**

- 782 **Adams, S. R., Maezawa, S., Alavattam, K. G., Abe, H., Sakashita, A., Shroder, M., Broering, T.**  
783 **J., Sroga Rios, J., Thomas, M. A., Lin, X., et al. (2018).** RNF8 and SCML2 cooperate to  
784 regulate ubiquitination and H3K27 acetylation for escape gene activation on the sex  
785 chromosomes. *PLoS Genet.* **14**,.
- 786 **Alexander, J. M., Hota, S. K., He, D., Thomas, S., Ho, L., Pennacchio, L. A. and Bruneau, B. G.**  
787 (2015). Brg1 modulates enhancer activation in mesoderm lineage commitment.  
788 *Development* **142**, 1418–1430.
- 789 **Alver, B. H., Kim, K. H., Lu, P., Wang, X., Manchester, H. E., Wang, W., Haswell, J. R., Park, P. J.**  
790 **and Roberts, C. W. M. (2017).** The SWI/SNF chromatin remodelling complex is required for  
791 maintenance of lineage specific enhancers. *Nat. Commun.* **8**, 1–10.
- 792 **Attanasio, C., Nord, A. S., Zhu, Y., Blow, M. J., Biddie, S. C., Mendenhall, E. M., Dixon, J.,**  
793 **Wright, C., Hosseini, R., Akiyama, J. A., et al. (2014).** Tissue-specific SMARCA4 binding at  
794 active and repressed regulatory elements during embryogenesis. *Genome Res.* **24**, 920–  
795 929.
- 796 **Baker, C. L., Kajita, S., Walker, M., Saxl, R. L., Raghupathy, N., Choi, K., Petkov, P. M. and**  
797 **Paigen, K. (2015).** PRDM9 Drives Evolutionary Erosion of Hotspots in *Mus musculus*  
798 through Haplotype-Specific Initiation of Meiotic Recombination. **11**,.
- 799 **Ball, R. L., Fujiwara, Y., Sun, F., Hu, J., Hibbs, M. A., Handel, M. A. and Carter, G. W. (2016).**  
800 Regulatory complexity revealed by integrated cytological and RNA-seq analyses of meiotic  
801 substages in mouse spermatocytes. *BMC Genomics* **17**, 1–17.
- 802 **Basciani, S., Mariani, S., Arizzi, M., Ulisse, S., Rucci, N., Jannini, E. A., Rocca, C. Della,**  
803 **Manicone, A., Carani, C., Spera, G., et al. (2002).** Expression of Platelet-Derived Growth  
804 Factor-A (PDGF-A), PDGF-B, and PDGF Receptor- $\alpha$  and - $\beta$  during Human Testicular  
805 Development and Disease. *J. Clin. Endocrinol. Metab.* **87**, 2310–2319.
- 806 **Basciani, S., Mariani, S., Arizzi, M., Ulisse, S., Rucci, N., Jannini, E. A., Rocca, C. Della,**  
807 **Manicone, A., Carani, C., Spera, G., et al. (2018).** Expression of Platelet-Derived Growth  
808 Factor-A. **87**, 2310–2319.
- 809 **Bellve, a R., Cavicchia, J. C., Millette, C. F., O'Brien, D. a, Bhatnagar, Y. M. and Dym, M.**

- 810 (1977). Spermatogenic cells of the prepubertal mouse. Isolation and morphological  
811 characterization. *J Cell Biol* **74**, 68–85.
- 812 **Bernstein, B. E., Mikkelsen, T. S., Xie, X., Kamal, M., Huebert, D. J., Cuff, J., Fry, B., Meissner,**  
813 **A., Wernig, M., Plath, K., et al.** (2006). A Bivalent Chromatin Structure Marks Key  
814 Developmental Genes in Embryonic Stem Cells. *Cell* **125**, 315–326.
- 815 **Blake, J. A., Richardson, J. E., Bult, C. J., Kadin, J. A., Eppig, J. T., Baldarelli, R. M., Beal, J. S.,**  
816 **Bradt, D. W., Burkart, D. L., Butler, N. E., et al.** (2003). MGD: The mouse genome  
817 database. *Nucleic Acids Res.* **31**, 193–195.
- 818 **Bray, N. L., Pimentel, H., Melsted, P. and Pachter, L.** (2016). Near-optimal probabilistic RNA-  
819 seq quantification. *Nat. Biotechnol.* **34**, 525–527.
- 820 **Brick, K., Smagulova, F., Khil, P., Camerini-Otero, R. D. and Petukhova, G. V.** (2012). Genetic  
821 recombination is directed away from functional genomic elements in mice. *Nature* **485**,  
822 642–645.
- 823 **Brind’Amour, J., Liu, S., Hudson, M., Chen, C., Karimi, M. M. and Lorincz, M. C.** (2015). An  
824 ultra-low-input native ChIP-seq protocol for genome-wide profiling of rare cell  
825 populations. *Nat. Commun.* **6**,
- 826 **Buaas, F. W., Kirsh, A. L., Sharma, M., McLean, D. J., Morris, J. L., Griswold, M. D., De Rooij, D.**  
827 **G. and Braun, R. E.** (2004). Plzf is required in adult male germ cells for stem cell self-  
828 renewal. *Nat. Genet.* **36**, 647–652.
- 829 **Buenrostro, J. D., Giresi, P. G., Zaba, L. C., Chang, H. Y. and Greenleaf, W. J.** (2013).  
830 Transposition of native chromatin for fast and sensitive epigenomic profiling of open  
831 chromatin, DNA-binding proteins and nucleosome position. *Nat. Methods* **10**, 1213–8.
- 832 **Chandler, R. L., Brennan, J., Schisler, J. C., Serber, D., Patterson, C. and Magnuson, T.** (2012).  
833 ARID1a-DNA Interactions Are Required for Promoter Occupancy by SWI/SNF. *Mol. Cell.*  
834 *Biol.* **33**, 265–280.
- 835 **Chang, Y. F., Lee-Chang, J. S., Panneerdoss, S., MacLean, J. a. and Rao, M. K.** (2011). Isolation  
836 of Sertoli, Leydig, and spermatogenic cells from the mouse testis. *Biotechniques* **51**, 341–  
837 344.
- 838 **Clapier, C. R., Iwasa, J., Cairns, B. R. and Peterson, C. L.** (2017). Mechanisms of action and

- 839 regulation of ATP-dependent chromatin-remodelling complexes. *Nat. Rev. Mol. Cell Biol.*
- 840 **Creppe, C., Palau, A., Malinverni, R., Valero, V. and Buschbeck, M.** (2014). A Cbx8-Containing
- 841 Polycomb Complex Facilitates the Transition to Gene Activation during ES Cell
- 842 Differentiation. *PLoS Genet.* **10**,.
- 843 **Dann, C. T., Alvarado, A. L., Molyneux, L. A., Denard, B. S., Garbers, D. L. and Porteus, M. H.**
- 844 (2008). Spermatogonial Stem Cell Self-Renewal Requires OCT4, a Factor Downregulated
- 845 During Retinoic Acid-Induced Differentiation. *Stem Cells* **26**, 2928–2937.
- 846 **De Vries, F. A. T., De Boer, E., Van Den Bosch, M., Baarends, W. M., Ooms, M., Yuan, L., Liu, J.**
- 847 **G., Van Zeeland, A. A., Heyting, C. and Pastink, A.** (2005). Mouse Sycp1 functions in
- 848 synaptonemal complex assembly, meiotic recombination, and XY body formation. *Genes*
- 849 *Dev.* **19**, 1376–1389.
- 850 **Diagouraga, B., Clément, J. A. J., Duret, L., Kadlec, J., de Massy, B. and Baudat, F.** (2018).
- 851 PRDM9 Methyltransferase Activity Is Essential for Meiotic DNA Double-Strand Break
- 852 Formation at Its Binding Sites. *Mol. Cell* **69**, 853–865.e6.
- 853 **Eaker, S., Pyle, A., Cobb, J. and Handel, M. A.** (2001). Evidence for meiotic spindle checkpoint
- 854 from analysis of spermatocytes from Robertsonian-chromosome heterozygous mice. *J. Cell*
- 855 *Sci.* **114**, 2953–2965.
- 856 **Euskirchen, G. M., Auerbach, R. K., Davidov, E., Gianoulis, T. a., Zhong, G., Rozowsky, J.,**
- 857 **Bhardwaj, N., Gerstein, M. B. and Snyder, M.** (2011). Diverse roles and interactions of the
- 858 SWI/SNF chromatin remodeling complex revealed using global approaches. *PLoS Genet.* **7**,.
- 859 **Fierz, B., Chatterjee, C., McGinty, R. K., Bar-Dagan, M., Raleigh, D. P. and Muir, T. W.** (2011).
- 860 Histone H2B ubiquitylation disrupts local and higher-order chromatin compaction. *Nat.*
- 861 *Chem. Biol.* **7**, 113–119.
- 862 **Gallardo, T., Shirley, L., John, G. B. and Castrillon, D. H.** (2007). Generation of a germ cell-
- 863 specific mouse transgenic Cre line, Vasa-Cre. *Genesis* **45**, 413–7.
- 864 **Gallinari, P., Di Marco, S., Jones, P., Pallaoro, M. and Steinkühler, C.** (2007). HDACs, histone
- 865 deacetylation and gene transcription: From molecular biology to cancer therapeutics. *Cell*
- 866 *Res.* **17**, 195–211.
- 867 **Gao, Z., Lee, P., Stafford, J. M., Schimmelman, M. Von, Schaefer, A. and Reinberg, D.** (2014).

- 868 An AUTS2 – Polycomb complex activates gene expression in the CNS. *Nature* **516**, 349–  
869 354.
- 870 **Goertz, M. J., Wu, Z., Gallardo, T. D., Hamra, F. K. and Castrillon, D. H.** (2011). Foxo1 is  
871 required in mouse spermatogonial stem cells for their maintenance and the initiation of  
872 spermatogenesis. *J. Clin. Invest.* **121**, 3456–3466.
- 873 **Goetz, P., Chandley, a C. and Speed, R. M.** (1984). Morphological and temporal sequence of  
874 meiotic prophase development at puberty in the male mouse. *J. Cell Sci.* **65**, 249–263.
- 875 **Green, C. D., Ma, Q., Manske, G. L., Shami, A. N., Zheng, X., Marini, S., Moritz, L., Sultan, C.,**  
876 **Gurczynski, S. J., Moore, B. B., et al.** (2018). A Comprehensive Roadmap of Murine  
877 Spermatogenesis Defined by Single-Cell RNA-Seq. *Dev. Cell* **46**, 651–667.e10.
- 878 **Hammoud, S. S., Low, D. H. P., Yi, C., Carrell, D. T., Guccione, E. and Cairns, B. R.** (2014).  
879 Chromatin and Transcription Transitions of Mammalian Adult Germline Stem Cells and  
880 Spermatogenesis. *Cell Stem Cell* **15**, 239–253.
- 881 **Handel, M. A. and Schimenti, J. C.** (2010). Genetics of mammalian meiosis: regulation,  
882 dynamics and impact on fertility. *Nat. Rev. Genet.* **11**, 124–136.
- 883 **Hasegawa, K., Sin, H., Hasegawa, K., Sin, H., Maezawa, S., Broering, T. J., Kartashov, A. V and**  
884 **Alavattam, K. G.** (2015). SCML2 Establishes the Male Germline Epigenome through  
885 Regulation of Histone H2A Ubiquitination Article SCML2 Establishes the Male Germline  
886 Epigenome through Regulation of Histone H2A Ubiquitination. *Dev. Cell* **32**, 574–588.
- 887 **Hayamizu, T. F., Wicks, M. N., Davidson, D. R., Burger, A., Ringwald, M. and Baldock, R. A.**  
888 (2013). Open Access EMAP / EMAPA ontology of mouse developmental anatomy : 2013  
889 update. *J. Biomed. Semantics* 1–5.
- 890 **Hayashi, K., Yoshida, K. and Matsui, Y.** (2005). A histone H3 methyltransferase controls  
891 epigenetic events required for meiotic prophase. *Nature* **438**, 374–378.
- 892 **Ho, L. and Crabtree, G. R.** (2010). Chromatin remodelling during development. *Nature* **463**,  
893 474–484.
- 894 **Ho, L., Ronan, J. L., Wu, J., Staahl, B. T., Chen, L., Kuo, A., Lessard, J., Nesvizhskii, A. I., Ranish,**  
895 **J. and Crabtree, G. R.** (2009). An embryonic stem cell chromatin remodeling complex,  
896 esBAF, is essential for embryonic stem cell self-renewal and pluripotency. *Proc. Natl. Acad.*

- 897 *Sci. U. S. A.* **106**, 5181–5186.
- 898 **Huether, R., Dong, L., Chen, X., Wu, G., Parker, M., Wei, L., Ma, J., Edmonson, M. N., Hedlund,**  
899 **E. K., Rusch, M. C., et al.** (2014). The landscape of somatic mutations in epigenetic  
900 regulators across 1,000 paediatric cancer genomes. *Nat. Commun.* **5**, 1–7.
- 901 **Ichijima, Y., Ichijima, M., Lou, Z., Nussenzweig, A., Daniel Camerini-Otero, R., Chen, J.,**  
902 **Andreassen, P. R. and Namekawa, S. H.** (2011). MDC1 directs chromosome-wide silencing  
903 of the sex chromosomes in male germ cells. *Genes Dev.* **25**, 959–971.
- 904 **Kadoch, C., Williams, R. T., Calarco, J. P., Miller, E. L., Weber, C. M., Braun, S. M. G., Pulice, J.**  
905 **L., Chory, E. J. and Crabtree, G. R.** (2016). Dynamics of BAF–Polycomb complex opposition  
906 on heterochromatin in normal and oncogenic states. *Nat. Genet.* **49**, 213–222.
- 907 **Kakarougkas, A., Ismail, A., Chambers, A., Riballo, E., Herbert, A., Künzel, J., Löbrich, M.,**  
908 **Jeggo, P. and Downs, J.** (2013). Requirement for PBAF in Transcriptional Repression and  
909 Repair at DNA Breaks in Actively Transcribed Regions of Chromatin. *Mol. Cell* 1–10.
- 910 **Kim, Y., Fedoriw, A. M. and Magnuson, T.** (2012). An essential role for a mammalian SWI/SNF  
911 chromatin-remodeling complex during male meiosis. *Development* **139**, 1133–1140.
- 912 **Kubota, H. and Brinster, R. L.** (2008). Culture of Rodent Spermatogonial Stem Cells, Male  
913 Germline Stem Cells of the Postnatal Animal. *Methods Cell Biol.* **86**, 59–84.
- 914 **Kwon, S.-J., Park, J.-H., Park, E.-J., Lee, S.-A., Lee, H.-S., Kang, S. W. and Kwon, J.** (2015). ATM-  
915 mediated phosphorylation of the chromatin remodeling enzyme BRG1 modulates DNA  
916 double-strand break repair. *Oncogene* **34**, 303–313.
- 917 **Lecona, E., Narendra, V. and Reinberg, D.** (2015). USP7 Cooperates with SCML2 To Regulate  
918 the Activity of PRC1. *Mol. Cell. Biol.* **35**, 1157–1168.
- 919 **Lee, H.-S., Park, J.-H., Kim, S.-J., Kwon, S.-J. and Kwon, J.** (2010). A cooperative activation loop  
920 among SWI/SNF, gamma-H2AX and H3 acetylation for DNA double-strand break repair.  
921 *EMBO J.* **29**, 1434–1445.
- 922 **Lee, J., Ogushi, S., Saitou, M. and Hirano, T.** (2011). Condensins I and II are essential for  
923 construction of bivalent chromosomes in mouse oocytes. *Mol. Biol. Cell* **22**, 3465–3477.
- 924 **Lesch, B. J., Dokshin, G. a, Young, R. a, McCarrey, J. R. and Page, D. C.** (2013). A set of genes  
925 critical to development is epigenetically poised in mouse germ cells from fetal stages



- 926 through completion of meiosis. *Proc. Natl. Acad. Sci. U. S. A.* **110**, 16061–6.
- 927 **Lesch, B. J., Silber, S. J., McCarrey, J. R. and Page, D. C.** (2016). Parallel evolution of male  
928 germline epigenetic poisoning and somatic development in animals. *Nat. Genet.* **48**, 1–10.
- 929 **Lessard, J., Wu, J. I., Ranish, J. a., Wan, M., Winslow, M. M., Staahl, B. T., Wu, H., Aebersold,**  
930 **R., Graef, I. a. and Crabtree, G. R.** (2007). An Essential Switch in Subunit Composition of a  
931 Chromatin Remodeling Complex during Neural Development. *Neuron* **55**, 201–215.
- 932 **Li, Y. C., Ross, J., Scheppler, J. A. and Franza Jr., B. R.** (1991). An in vitro transcription analysis  
933 of early responses of the human immunodeficiency virus type 1 long terminal repeat to  
934 different transcriptional activators. *Mol Cell Biol* **11**, 1883–1893.
- 935 **Li, W., Wu, J., Kim, S.-Y., Zhao, M., Hearn, S. a, Zhang, M. Q., Meistrich, M. L. and Mills, A. a**  
936 (2014). Chd5 orchestrates chromatin remodelling during sperm development. *Nat.*  
937 *Commun.* **5**, 3812.
- 938 **Luo, M., Zhou, J., Leu, N. A., Abreu, C. M., Wang, J., Anguera, M. C., de Rooij, D. G., Jasin, M.**  
939 **and Wang, P. J.** (2015). Polycomb Protein SCML2 Associates with USP7 and Counteracts  
940 Histone H2A Ubiquitination in the XY Chromatin during Male Meiosis. *PLoS Genet.* **11**, 1–  
941 17.
- 942 **Ma, P., Pan, H., Montgomery, R. L., Olson, E. N. and Schultz, R. M.** (2012). Compensatory  
943 functions of histone deacetylase 1 (HDAC1) and HDAC2 regulate transcription and  
944 apoptosis during mouse oocyte development. *Proc. Natl. Acad. Sci.* **109**, E481–E489.
- 945 **Maertens, G. N., El Messaoudi-Aubert, S., Elderkin, S., Hiom, K. and Peters, G.** (2010).  
946 Ubiquitin-specific proteases 7 and 11 modulate Polycomb regulation of the INK4a tumour  
947 suppressor. *EMBO J.* **29**, 2553–2565.
- 948 **Maezawa, S., Hasegawa, K., Yukawa, M., Sakashita, A., Alavattam, K. G., Andreassen, P. R.,**  
949 **Vidal, M., Koseki, H., Barski, A. and Namekawa, S. H.** (2017). Polycomb directs timely  
950 activation of germline genes in spermatogenesis. *Genes Dev.* **31**, 1693–1703.
- 951 **Maezawa, S., Hasegawa, K., Yukawa, M., Kubo, N. and Sakashita, A.** (2018). Polycomb protein  
952 SCML2 facilitates H3K27me3 to establish bivalent domains in the male germline [Genetics].  
953 *Pnas* 3–8.
- 954 **Margolin, G., Khil, P. P., Kim, J., Bellani, M. a and Camerini-Otero, R. D.** (2014). Integrated

- 955 transcriptome analysis of mouse spermatogenesis. *BMC Genomics* **15**, 39.
- 956 **Masliah-Planchon, J., Bièche, I., Guinebretière, J.-M., Bourdeaut, F. and Delattre, O.** (2015).  
957 SWI/SNF Chromatin Remodeling and Human Malignancies. *Annu. Rev. Pathol. Mech. Dis.*  
958 **10**, 145–171.
- 959 **Méndez, J. and Stillman, B.** (2000). Chromatin association of human origin recognition  
960 complex, cdc6, and minichromosome maintenance proteins during the cell cycle: assembly  
961 of prereplication complexes in late mitosis. *Mol. Cell. Biol.* **20**, 8602–12.
- 962 **Minsky, N., Shema, E., Field, Y., Schuster, M., Segal, E. and Oren, M.** (2008).  
963 Monoubiquitinated H2B is associated with the transcribed region of highly expressed  
964 genes in human cells. *Nat. Cell Biol.* **10**, 483–488.
- 965 **Montgomery, R. L., Hsieh, J., Barbosa, A. C., Richardson, J. A. and Olson, E. N.** (2009). Histone  
966 deacetylases 1 and 2 control the progression of neural precursors to neurons during brain  
967 development. *Proc. Natl. Acad. Sci.* **106**, 7876–7881.
- 968 **Motenko, H., Neuhauser, S. B., O’Keefe, M. and Richardson, J. E.** (2015). MouseMine: a new  
969 data warehouse for MGI. *Mamm. Genome* **26**, 325–330.
- 970 **Mu, W., Starmer, J., Fedoriw, A. M., Yee, D. and Magnuson, T.** (2014). Repression of the soma-  
971 specific transcriptome by Polycomb-repressive complex 2 promotes male germ cell  
972 development. *Genes Dev.* **28**, 2056–2069.
- 973 **Nicassio, F., Corrado, N., Vissers, J. H. A., Areces, L. B., Bergink, S., Marteiijn, J. A., Geverts, B.,**  
974 **Houtsmuller, A. B., Vermeulen, W., Di Fiore, P. P., et al.** (2007). Human USP3 Is a  
975 Chromatin Modifier Required for S Phase Progression and Genome Stability. *Curr. Biol.* **17**,  
976 1972–1977.
- 977 **Oatley, M. J., Kaucher, A. V., Racicot, K. E. and Oatley, J. M.** (2011). Inhibitor of DNA binding 4  
978 is expressed selectively by single spermatogonia in the male germline and regulates the  
979 self-renewal of spermatogonial stem cells in mice. *Biol. Reprod.* **85**, 347–356.
- 980 **Ogiwara, H., Ui, A., Otsuka, A., Satoh, H., Yokomi, I., Nakajima, S., Yasui, A., Yokota, J. and**  
981 **Kohno, T.** (2011). Histone acetylation by CBP and p300 at double-strand break sites  
982 facilitates SWI/SNF chromatin remodeling and the recruitment of non-homologous end  
983 joining factors. *Oncogene* **30**, 2135–2146.

- 984 **Pavri, R., Zhu, B., Li, G., Trojer, P., Mandal, S., Shilatifard, A. and Reinberg, D.** (2006). Histone  
985 H2B Monoubiquitination Functions Cooperatively with FACT to Regulate Elongation by  
986 RNA Polymerase II. *Cell* **125**, 703–717.
- 987 **Peters, A. H. F. M., Plug, A. W., Van Vugt, M. J. and De Boer, P.** (1997). A drying-down  
988 technique for the spreading of mammalian melocytes from the male and female germline.  
989 *Chromosom. Res.* **5**, 66–68.
- 990 **Qi, W., Wang, R., Chen, H., Wang, X., Xiao, T., Boldogh, I., Ba, X., Han, L. and Zeng, X.** (2014).  
991 BRG1 promotes the repair of DNA double-strand breaks by facilitating the replacement of  
992 RPA with RAD51. *J. Cell Sci.* **128**, 317–330.
- 993 **Raab, J. R., Resnick, S. and Magnuson, T.** (2015). Genome-Wide Transcriptional Regulation  
994 Mediated by Biochemically Distinct SWI/SNF Complexes. *PLoS Genet.* **11**, 1–26.
- 995 **Raab, J. R., Runge, J. S., Spear, C. C. and Magnuson, T.** (2017). Co-regulation of transcription by  
996 BRG1 and BRM, two mutually exclusive SWI/SNF ATPase subunits. *Epigenetics and*  
997 *Chromatin* **10**, 1–15.
- 998 **Robinson, M. D., McCarthy, D. J. and Smyth, G. K.** (2010). edgeR: a Bioconductor package for  
999 differential expression analysis of digital gene expression data. *Bioinformatics* **26**, 139–40.
- 1000 **Royo, H., Prosser, H., Ruzankina, Y., Mahadevaiah, S. K., Cloutier, J. M., Baumann, M.,**  
1001 **Fukuda, T., Höög, C., Tóth, A., de Rooij, D. G., et al.** (2013). ATR acts stage specifically to  
1002 regulate multiple aspects of mammalian meiotic silencing. *Genes Dev.* **27**, 1484–1494.
- 1003 **Sadate-Ngatchou, P. I., Payne, C. J., Dearth, A. T. and Braun, R. E.** (2008). Cre recombinase  
1004 activity specific to postnatal, premeiotic male germ cells in transgenic mice. *Genesis* **46**,  
1005 738–742.
- 1006 **Schmahl, J., Rizzolo, K. and Soriano, P.** (2008). The PDGF signaling pathway controls multiple  
1007 steroid-producing lineages. *Genes Dev.* **22**, 3255–3267.
- 1008 **Serber, D. W., Runge, J. S., Menon, D. U. and Magnuson, T.** (2015). The Mouse INO80  
1009 Chromatin Remodeling Complex Is an Essential Meiotic Factor for Spermatogenesis. *Biol.*  
1010 *Reprod.*
- 1011 **Shechter, D., Dormann, H. L., Allis, C. D. and Hake, S. B.** (2007). Extraction, purification and  
1012 analysis of histones. *Nat. Protoc.* **2**, 1445–1457.

- 1013 **Soneson, C., Love, M. I. and Robinson, M. D.** (2016). Differential analyses for RNA-seq:  
1014 transcript-level estimates improve gene-level inferences. *F1000Research* **4**, 1521.
- 1015 **Stanton, B. Z., Hodges, C., Calarco, J. P., Braun, S. M. G., Ku, W. L., Kadoch, C., Zhao, K. and**  
1016 **Crabtree, G. R.** (2016). Smarca4 ATPase mutations disrupt direct eviction of PRC1 from  
1017 chromatin. *Nat. Genet.* **49**, 282–288.
- 1018 **Sumi-Ichinose, C., Ichinose, H., Metzger, D. and Chambon, P.** (1997). SNF2beta-BRG1 is  
1019 essential for the viability of F9 murine embryonal carcinoma cells. *Mol. Cell. Biol.* **17**, 5976–  
1020 5986.
- 1021 **Tachibana, M., Nozaki, M., Takeda, N. and Shinkai, Y.** (2007). Functional dynamics of H3K9  
1022 methylation during meiotic prophase progression. *EMBO J.* **26**, 3346–3359.
- 1023 **Takada, Y., Naruse, C., Costa, Y., Shirakawa, T., Tachibana, M., Sharif, J., Kezuka-Shiotani, F.,**  
1024 **Kakiuchi, D., Masumoto, H., Shinkai, Y. -i., et al.** (2011). HP1 links histone methylation  
1025 marks to meiotic synapsis in mice. *Development* **138**, 4207–4217.
- 1026 **Tolstorukov, M. Y., Sansam, C. G., Lu, P., Koellhoffer, E. C., Helming, K. C., Alver, B. H., Tillman,**  
1027 **E. J., Evans, J. a, Wilson, B. G., Park, P. J., et al.** (2013). Swi/Snf chromatin  
1028 remodeling/tumor suppressor complex establishes nucleosome occupancy at target  
1029 promoters. *Proc. Natl. Acad. Sci.* **110**, 10165–10170.
- 1030 **Turner, J. M. a.** (2007). Meiotic sex chromosome inactivation. *Development* **134**, 1823–1831.
- 1031 **Turner, J. M. A., Aprelikova, O., Xu, X., Wang, R., Kim, S., Chandramouli, G. V. R., Barrett, J. C.,**  
1032 **Burgoyne, P. S. and Deng, C. X.** (2004). BRCA1, histone H2AX phosphorylation, and male  
1033 meiotic sex chromosome inactivation. *Curr. Biol.* **14**, 2135–2142.
- 1034 **Van Der Knaap, J. A., Kumar, B. R. P., Moshkin, Y. M., Langenberg, K., Krijgsveld, J., Heck, A. J.**  
1035 **R., Karch, F. and Verrijzer, C. P.** (2005). GMP synthetase stimulates histone H2B  
1036 deubiquitylation by the epigenetic silencer USP7. *Mol. Cell* **17**, 695–707.
- 1037 **Wang, H., Wang, L., Erdjument-Bromage, H., Vidal, M., Tempst, P., Jones, R. S. and Zhang, Y.**  
1038 (2004). Role of histone H2A ubiquitination in Polycomb silencing. *Nature* **431**, 873–878.
- 1039 **Wang, J., Gu, H., Lin, H. and Chi, T.** (2012). Essential Roles of the Chromatin Remodeling Factor  
1040 Brg1 in Spermatogenesis in Mice. *Biol. Reprod.* **86**, 186–186.
- 1041 **Watanabe, R., Ui, A., Kanno, S. I., Ogiwara, H., Nagase, T., Kohno, T. and Yasui, A.** (2014).

1042 SWI/SNF factors required for cellular resistance to dna damage include arid1a and arid1b  
1043 and show interdependent protein stability. *Cancer Res.* **74**, 2465–2475.

1044 **Wilson, B. G., Wang, X., Shen, X., McKenna, E. S., Lemieux, M. E., Cho, Y. J., Koellhoffer, E. C.,**  
1045 **Pomeroy, S. L., Orkin, S. H. and Roberts, C. W. M.** (2010). Epigenetic antagonism between  
1046 polycomb and SWI/SNF complexes during oncogenic transformation. *Cancer Cell* **18**, 316–  
1047 328.

1048 **Wojtasz, L., Daniel, K., Roig, I., Bolcun-Filas, E., Xu, H., Boonsanay, V., Eckmann, C. R., Cooke,**  
1049 **H. J., Jasin, M., Keeney, S., et al.** (2009). Mouse HORMAD1 and HORMAD2, two conserved  
1050 meiotic chromosomal proteins, are depleted from synapsed chromosome axes with the  
1051 help of TRIP13 AAA-ATPase. *PLoS Genet.* **5**,.

1052 **Wu, X., Oatley, J. M., Oatley, M. J., Kaucher, A. V., Avarbock, M. R. and Brinster, R. L.** (2010).  
1053 The POU Domain Transcription Factor POU3F1 Is an Important Intrinsic Regulator of GDNF-  
1054 Induced Survival and Self-Renewal of Mouse Spermatogonial Stem Cells1. *Biol. Reprod.* **82**,  
1055 1103–1111.

1056 **Yamaguchi, T., Cubizolles, F., Zhang, Y., Reichert, N., Kohler, H., Seiser, C. and Matthias, P.**  
1057 (2010). Histone deacetylases 1 and 2 act in concert to promote the G1-to-S progression.  
1058 *Genes Dev.* **24**, 455–469.

1059 **Yang, F., De La Fuente, R., Leu, N. A., Baumann, C., McLaughlin, K. J. and Wang, P. J.** (2006).  
1060 Mouse SYCP2 is required for synaptonemal complex assembly and chromosomal synapsis  
1061 during male meiosis. *J. Cell Biol.* **173**, 497–507.

1062 **Yu, G., Wang, L.-G., Han, Y. and He, Q.-Y.** (2012). clusterProfiler: an R Package for Comparing  
1063 Biological Themes Among Gene Clusters. *Omi. A J. Integr. Biol.* **16**, 284–287.

1064 **Zhang, Y., Liu, T., Meyer, C. A., Eeckhoute, J., Johnson, D. S., Bernstein, B. E., Nussbaum, C.,**  
1065 **Myers, R. M., Brown, M., Li, W., et al.** (2008). Model-based analysis of ChIP-Seq (MACS).  
1066 *Genome Biol.* **9**,.

1067

1068

## 1 **Figure Legends:**

2

3 **Figure 1.** BRG1 is enriched at transcriptionally active and poised regions. The relative  
4 enrichment of BRG1, H3K4me3 and H3K27me3 from P12, P17 and P18 testes at, (A) RefSeq  
5 gene, TSS  $\pm$  4 Kb shown using heatmap with K-means clustering (B) TSS  $\pm$  4 Kb associated  
6 with BRG1 target (P12 peaks) genes categorized by their temporal expression profile. (C) P12  
7 and P18 BRG1 enrichment at TSS  $\pm$  4 Kb on chromosome X. TSS: Transcription start site.

8

9

10 **Figure 2.** BRG1 influences transcription during spermatogenesis. (A) Log<sub>2</sub> fold change (y-axis)  
11 in transcript abundance (CPM: Counts per million, x-axis) of genes in the P12 *Brg1<sup>ckO</sup>* relative to  
12 *Brg1<sup>WT</sup>*. Each dot denotes a gene and horizontal blue lines denote a 2-fold. (B) Table listing  
13 enriched anatomy and gene ontology terms associated with BRG1 regulated genes. Benjamini  
14 – Hochberg, adjusted p-values are reported in parenthesis. (C) Heatmap showing transcript  
15 abundance (z-scores) of genes (rows) associated with mouse phenotype ontologies in P12  
16 *Brg1<sup>WT</sup>* (WT1-WT4) and *Brg1<sup>ckO</sup>* (KO1-KO4) (columns). (D) P10 *Brg1<sup>WT</sup>* and *Brg1<sup>ckO</sup>* testes  
17 cryosections (25x objective Scale bar: 20  $\mu$ m), immuno-labeled for ZBTB16 (green) and counter  
18 stained with DAPI (blue). The average numbers of SpgA and standard error of measurement  
19 (SEM) are indicated. (E) Western blot for SYCP2 in sub-cellular fractions obtained from P21  
20 *Brg1<sup>WT</sup>*, *Brg1<sup>Het</sup>* and *Brg1<sup>ckO</sup>* spermatogenic cells. Histone H3 is loading control. (F) *Brg1<sup>WT</sup>* and  
21 *Brg1<sup>ckO</sup>* zygotene spermatocytes (100x objective, Scale bar: 10  $\mu$ m) immuno-labeled for SYCP2  
22 (red) and  $\gamma$ H2Ax (green).

23

24 **Figure 3.** BRG1 directly regulates chromatin accessibility at promoters. (A) Log<sub>2</sub> normalized  
25 ATAC-seq read coverage with added pseudocount (y-axis) at promoters (TSS $\pm$  0.5Kb) of BRG1  
26 regulated genes (x-axis) in P12 *Brg1<sup>wt</sup>* (red) and *Brg1<sup>ckO</sup>* (blue) spermatogenic cells. \*\*\*:  
27 p<0.001; NS: not significant, as calculated by Wilcoxon rank sum test (B) Log<sub>2</sub> fold change (y-  
28 axis) in read counts (CPM: counts per million, x-axis) in P12 *Brg1<sup>ckO</sup>* relative to *Brg1<sup>WT</sup>*. Each  
29 dot represents a 300bp-binned region. Horizontal blue lines denote 2-fold change. (C) Genomic  
30 associations of closed and opened regions. n: Total number of regions. (D) Gene ontology  
31 analysis of closed and opened regions. Benjamini – Hochberg, adjusted p-values are shown.

32

33

34 **Figure 4.** BRG1 physically interacts with SCML2 to regulate gene expression. (A) Silver stained  
35 gel (left) and table (right) summarizing BRG1 IP-MS results. Numbers in parenthesis are  
36 associated with control IgG. (B) SCML2 Co-IP analysis. Red arrowheads label interacting  
37 proteins. Lane numbers are labeled (1-3) (C) P12 (green line) and P18 (orange line) BRG1  
38 enrichment at TSS  $\pm$  2 Kb, of genes differentially regulated by SCML2 in pachytene  
39 spermatocytes. pach *Scml2* Act: Activated, pach *Scml2* Rep: Repressed. (D) Log2 fold change  
40 in expression (KO/WT), of genes upon the loss of BRG1 (y-axis) and SCML2 (x-axis). Each dot  
41 represents a commonly mis-regulated gene (FDR<0.05), showing either concordant (green  
42 dots) or discordant (orange dots) changes in genes expression. n: number of concordantly mis-  
43 regulated genes.  $r^2$  values were derived from pearson's correlation test.

44

45

46 **Figure 5.** BRG1 influences the localization of SCML2 to the sex body. P21 *Brg1*<sup>WT</sup> and *Brg1*<sup>ckO</sup>  
47 testes cryosections (63x objective, Scale bar: 20  $\mu$ m), co-stained for  $\gamma$ H2Ax (red) and (A)  
48 SCML2 (green), (B) USP7 (green). DNA (blue) stained with DAPI. Arrowheads label the sex  
49 body. Panel insets show representative pachytene (Pa) spermatocytes. (C) *Brg1*<sup>WT</sup> and *Brg1*<sup>ckO</sup>  
50 pachytene spermatocytes spreads (100x objective, Scale bar: 20  $\mu$ m), co-stained for SYCP3  
51 (red) and left: BRCA1 (green), middle: ATR (green), right: MDC1 (green). Panel insets highlight  
52 sex chromosomes.

53

54 **Figure 6.** BRG1 regulates H2AK119ub1 and H3K27ac during spermatogenesis. (A) Western  
55 blots analysis of H2AK119ub1, H3K27ac, H3K4me3 and H3K27me3 in acid-extracts from P12  
56 *Brg1*<sup>WT</sup>, *Brg1*<sup>Het</sup> and *Brg1*<sup>ckO</sup> testes. Loading control: Histone H3. (B) Log2 fold change (y-axis), in  
57 P12 H2AK119ub1 (green box) and H3K27ac (Orange box) at BRG1 occupied promoters (TSS $\pm$   
58 0.5Kb, x-axis) categorized by chromosomal location (top panel) and transcriptional status  
59 (bottom panel). \*\*\*:  $p < 0.001$ ; NS: not significant, as calculated by Wilcoxon rank sum test. (C)  
60 H3K27ac (left) and BRG1 (right) enrichment at lost, gained and common H3K27ac peaks. (D)  
61 Western blot analysis (top panel) and quantification (bottom) of BRG1, RNF2, USP3 and  
62 HDAC1 in P12 *Brg1*<sup>WT</sup>, *Brg1*<sup>Het</sup> and *Brg1*<sup>ckO</sup> spermatogenic cells. Protein abundance are  
63 normalized to H3 and determined from at least two independent trials. Error bars represent the  
64 standard error of mean (SEM). \*:  $p < 0.05$  (students t-test).

65

66 **Figure 7.** Model describing the role of SWI/SNF in spermatogenic gene regulation. (A) During  
67 spermatogenesis BRG1 activates genes essential for the maintenance of undifferentiated  
68 spermatogonia and ensures meiotic progression by activating meiotic genes and repressing  
69 pre-meiotic and somatic genes in spermatocytes (B) During meiosis, activated gene promoters  
70 display H3K4me3 while repressed gene promoters are bivalently modified (H3K4me3 and  
71 H3K27me3). BRG1 maintains promoter accessibility and suppresses H2AK119ub1 and  
72 enhances H3K27ac at target genes. We propose that BRG1 recruits SCML2 and its associated  
73 deubiquitinase, USP7 to epigenetically regulate cognate repressed targets.

74

75

76



A

bioRxiv preprint doi: <https://doi.org/10.1101/476143>; this version posted November 26, 2018. The copyright holder for this preprint (which was not certified by peer review) is the author/funder, who has granted bioRxiv a license to display the preprint in perpetuity. It is made available under aCC-BY-NC-ND 4.0 International license.

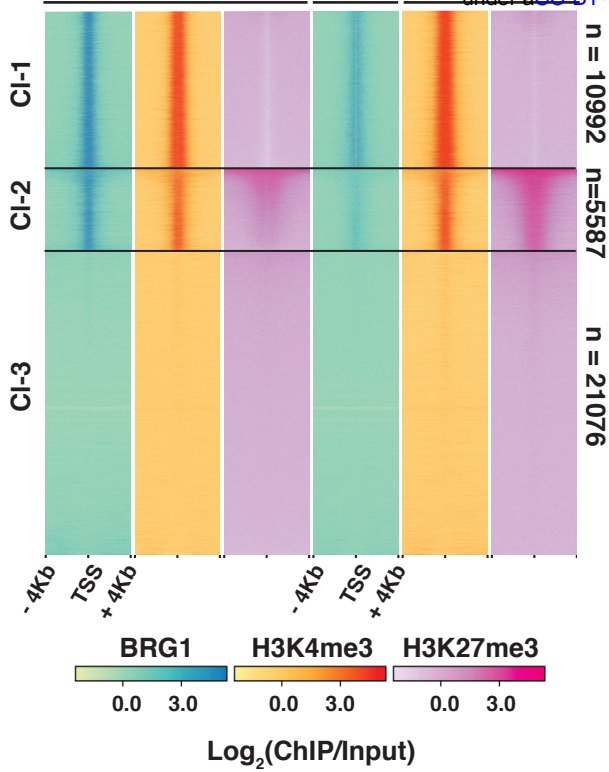

C

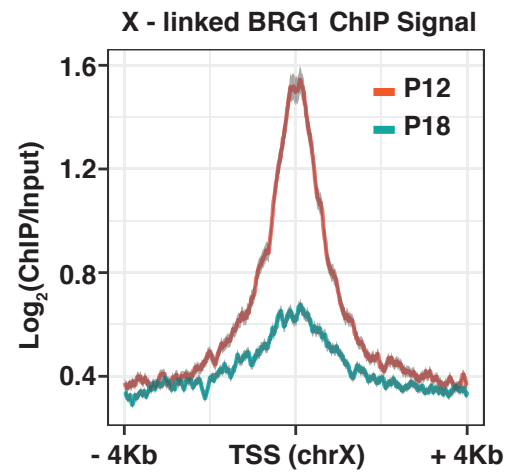

B

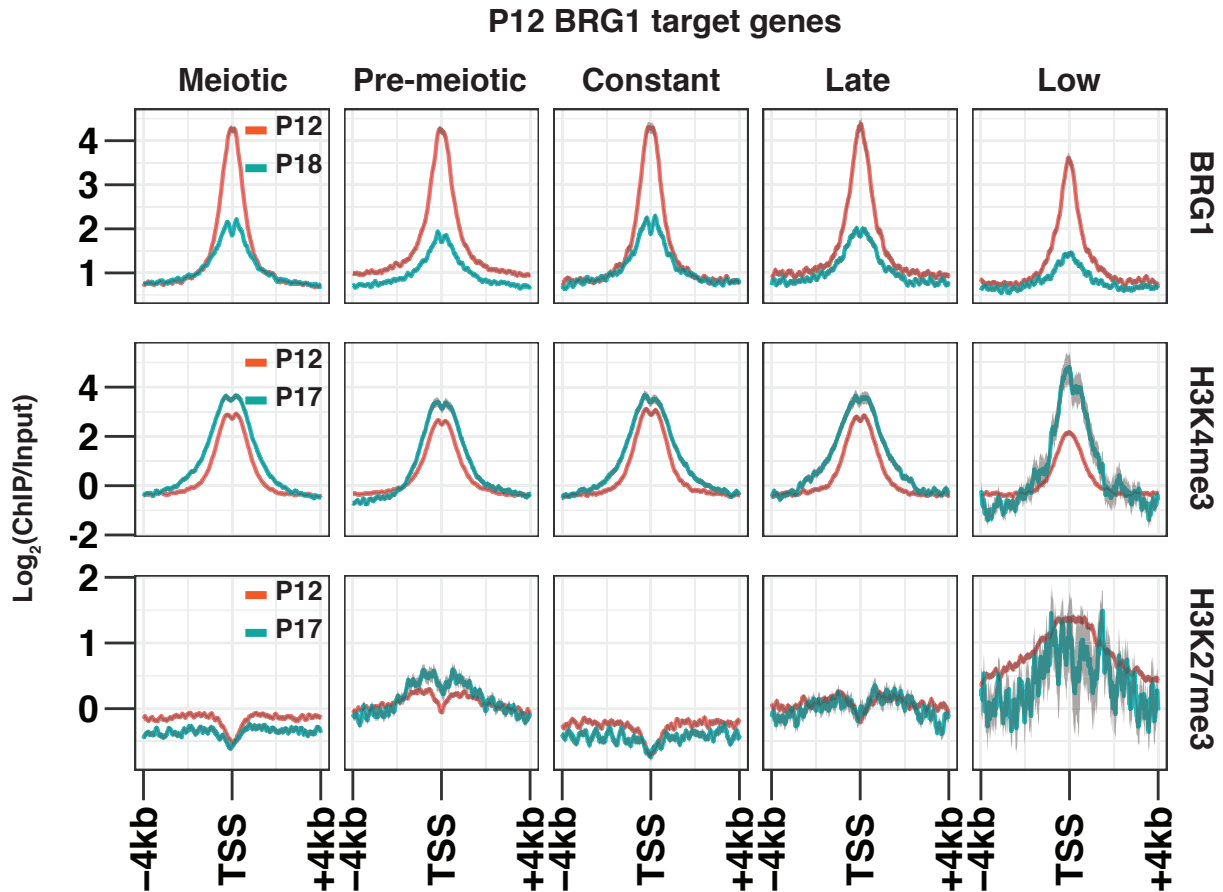

A

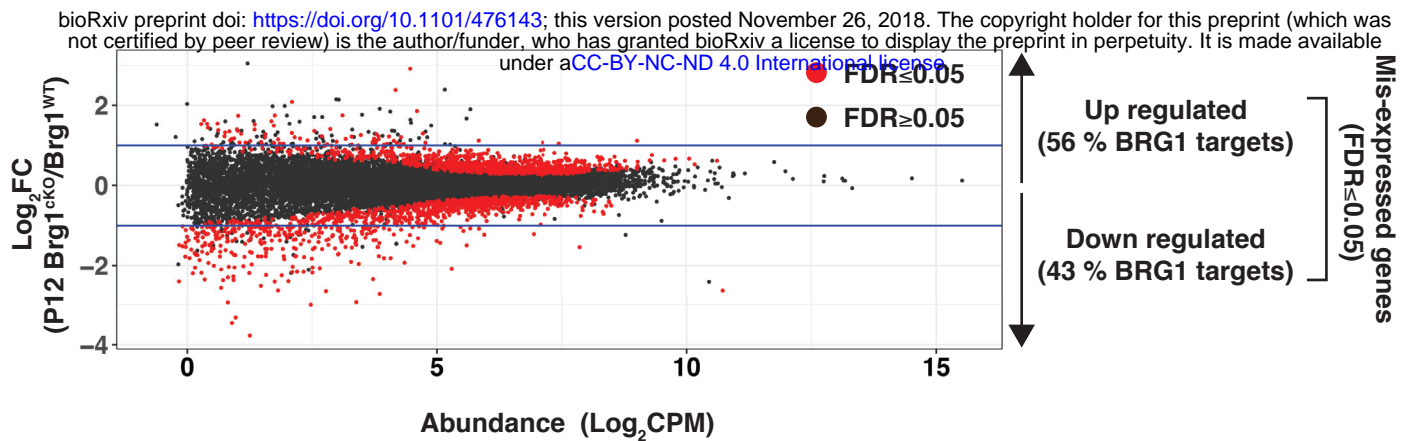

B

|                | Anatomy Ontology (adj. p value)    | Gene Ontology (adj. p value)                         |
|----------------|------------------------------------|------------------------------------------------------|
| Down regulated | Brain (0.0049)                     | Meiotic cell cycle (2.292e-12)                       |
|                | Central nervous system (0.0051)    | meiotic nuclear division (4.727e-11)                 |
|                | Gonad (0.0052)                     | chromosome segregation (1.747e-10)                   |
|                | Molar (0.0057)                     | chromosome organization (2.756e-08)                  |
| Up regulated   | Limb (4.077e-0.9)                  | Regulation of cell morphogenesis (0.00013)           |
|                | Mesenchyme (5.17e-0.9)             | Axonogenesis (0.00013)                               |
|                | Musculoskeletal system (5.27e-0.9) | Developmental cell growth (0.00019)                  |
|                | Oral region (9.21e-0.9)            | Regulation of actin filament-based process (0.00019) |

C

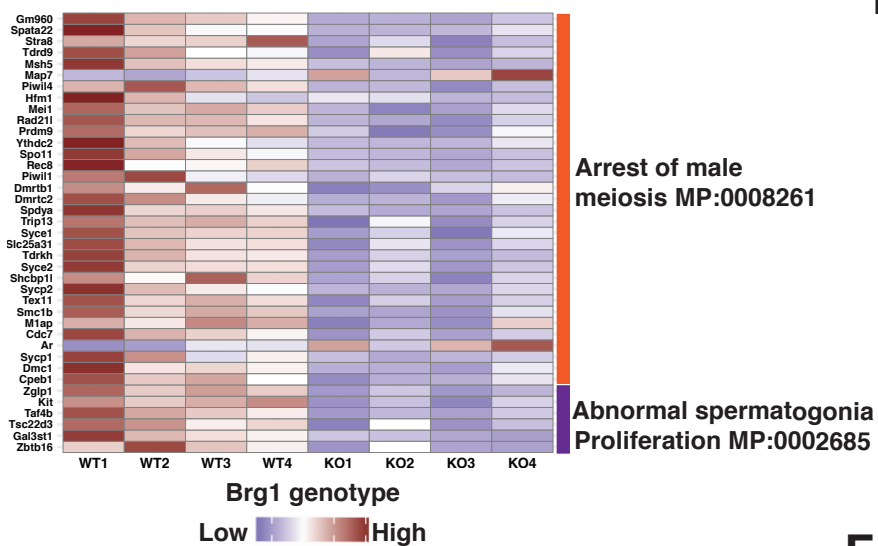

D

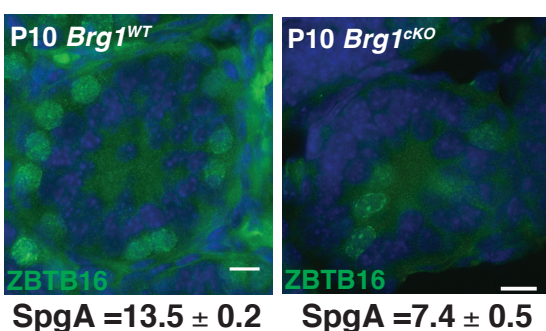

E

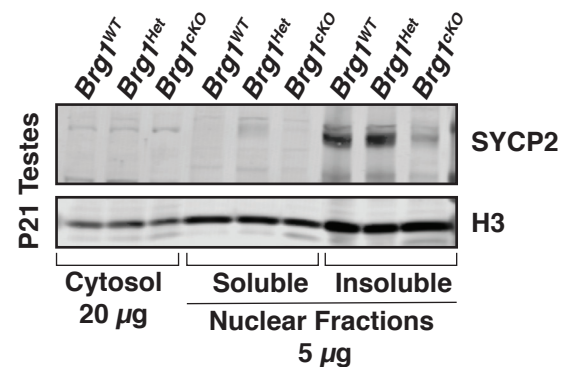

F

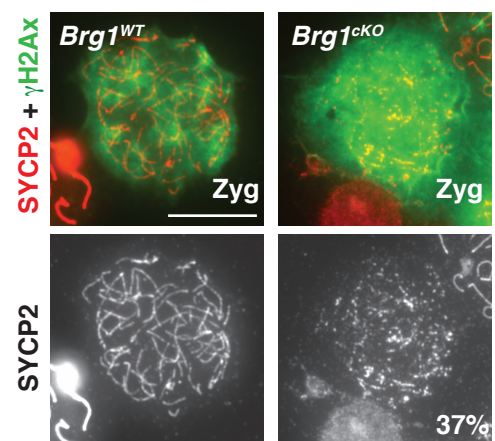

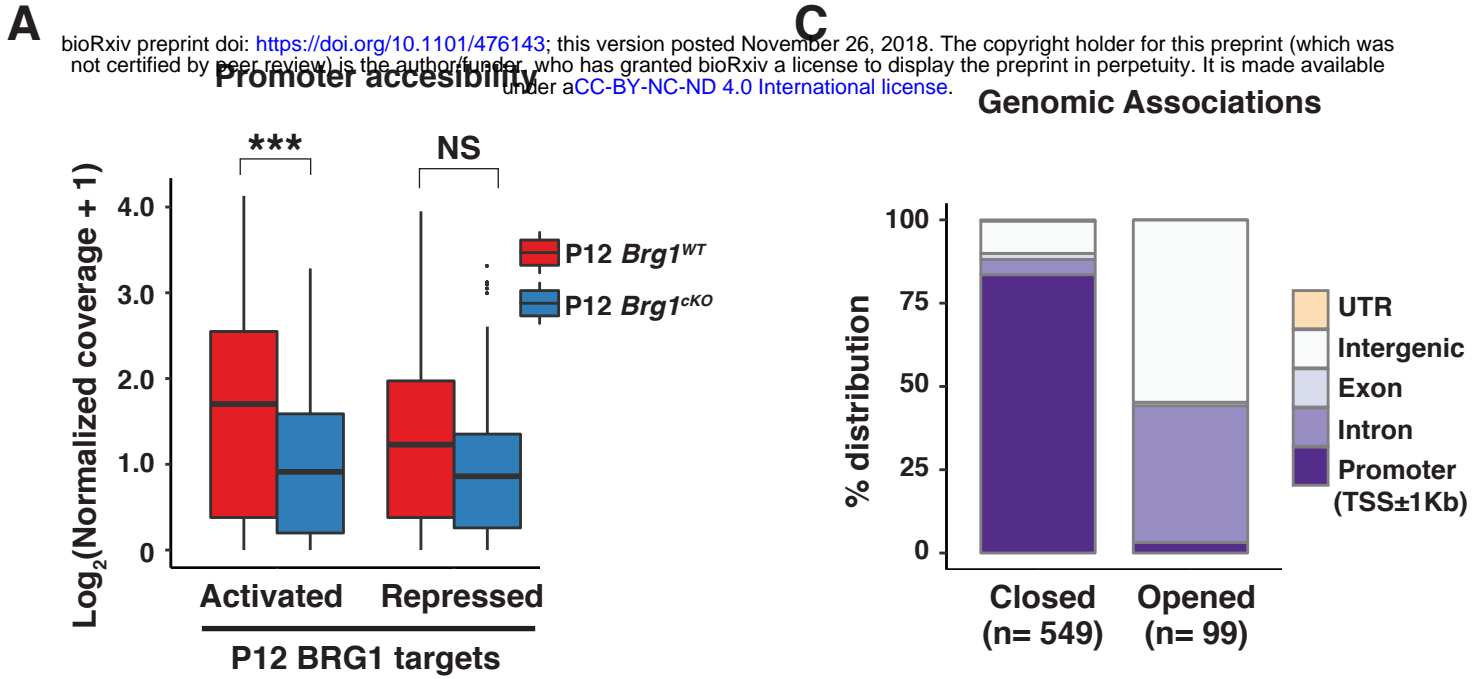**B**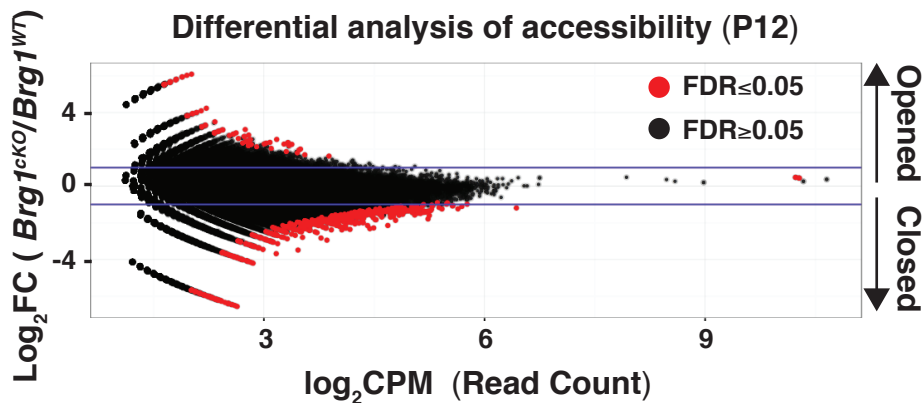**D**

|        | Gene Ontology (Biological Process) | Adj.p value | Candidate Genes                   |
|--------|------------------------------------|-------------|-----------------------------------|
| Closed | Meiotic cell cycle                 | 0.0003      | <i>Top6bl, Tex19.1, Brca2</i>     |
|        | DNA repair                         | 0.0009      | <i>Yy1, Ube2n, Fanca, Mus81</i>   |
|        | Chromosome organization            | 0.0009      | <i>Stag3, Phf13, Ercc3, Ccne2</i> |
| Opened | Cardiac muscle tissue development  | 0.06        | <i>Angpt1, Zfp2, Pln</i>          |
|        | Fat cell differentiation           | 0.06        | <i>Jag1, Fndc3b, Igf1</i>         |
|        | Cytoplasm organization             | 0.06        | <i>Zmiz1, Etv6</i>                |

bioRxiv preprint doi: <https://doi.org/10.1101/476143>; this version posted November 26, 2018. The copyright holder for this preprint (which was not certified by peer review) is the author/funder, who has granted bioRxiv a license to display the preprint in perpetuity. It is made available under aCC-BY-NC-ND 4.0 International license.

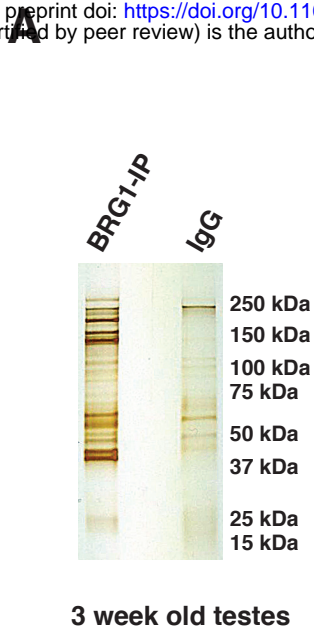

|      | Protein | # Unique Peptide | % Coverage |
|------|---------|------------------|------------|
| Core | BRG1    | 63               | 45         |
|      | SNF5    | 24               | 70         |
|      | BAF155  | 55               | 61         |
|      | BAF170  | 49               | 52         |
| PBAF | ARID2   | 46               | 38         |
|      | PBRM1   | 43               | 35         |
|      | BRD7    | 17               | 44         |
| BAF  | ARID1A  | 68               | 42         |
|      | ARID1B  | 45               | 26         |
|      | BRD9    | 12               | 33         |
|      | BCL7A   | 5                | 41         |
|      | BCL7B   | 5                | 41         |
|      | BCL7C   | 5                | 46         |
| PRC1 | SCML2   | 11(14)           | 16(17)     |

**B**

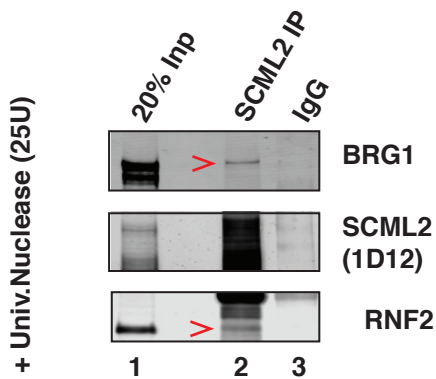

**C**

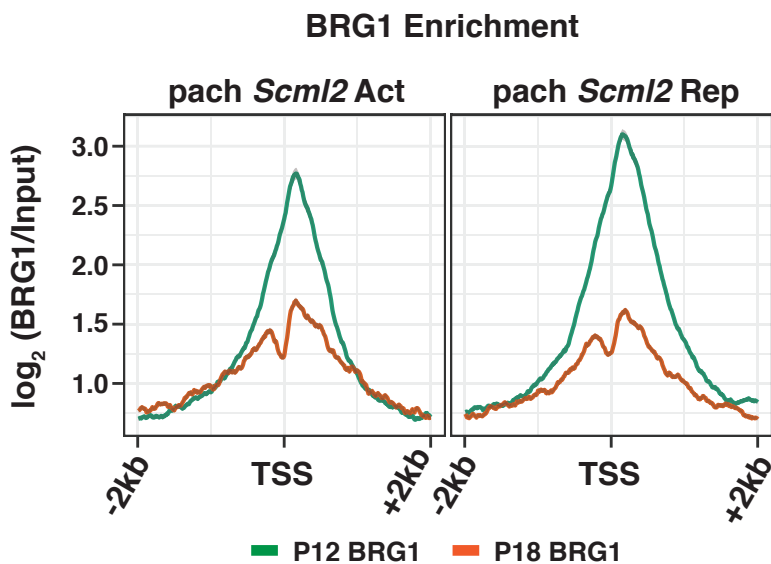

**D**

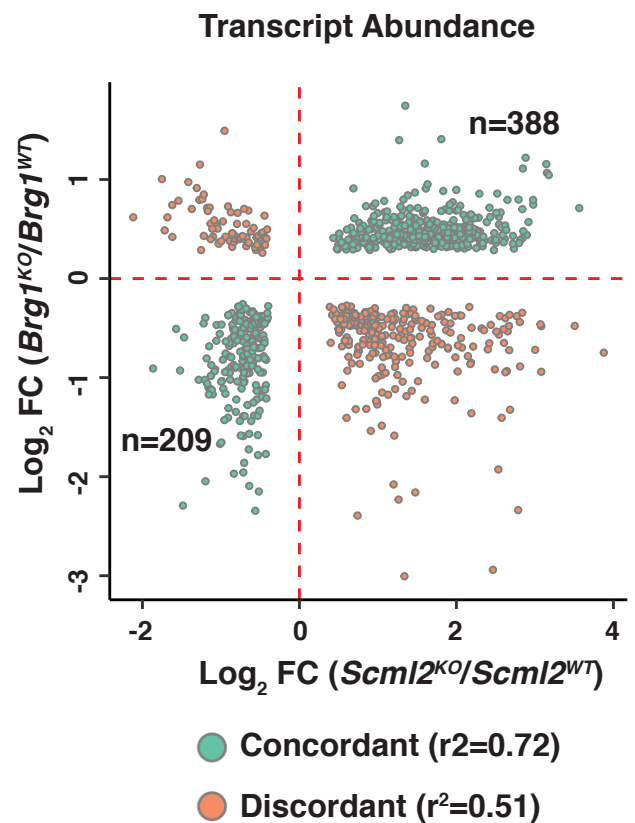

A

bioRxiv preprint doi: <https://doi.org/10.1101/476143>; this version posted November 26, 2018. The copyright holder for this preprint (which was not certified by peer review) is the author/funder, who has granted bioRxiv a license to display the preprint in perpetuity. It is made available under aCC-BY-NC-ND 4.0 International license.

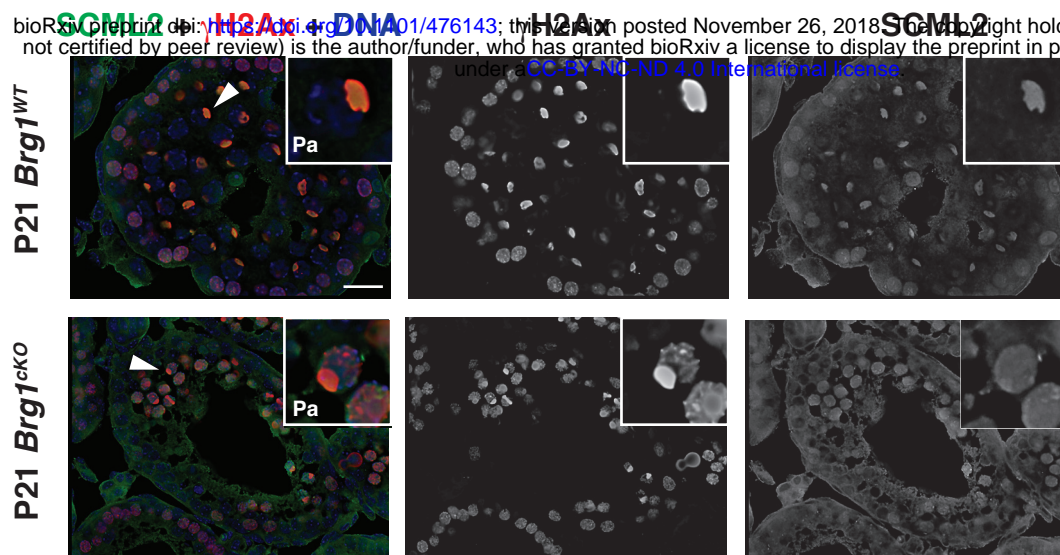

B

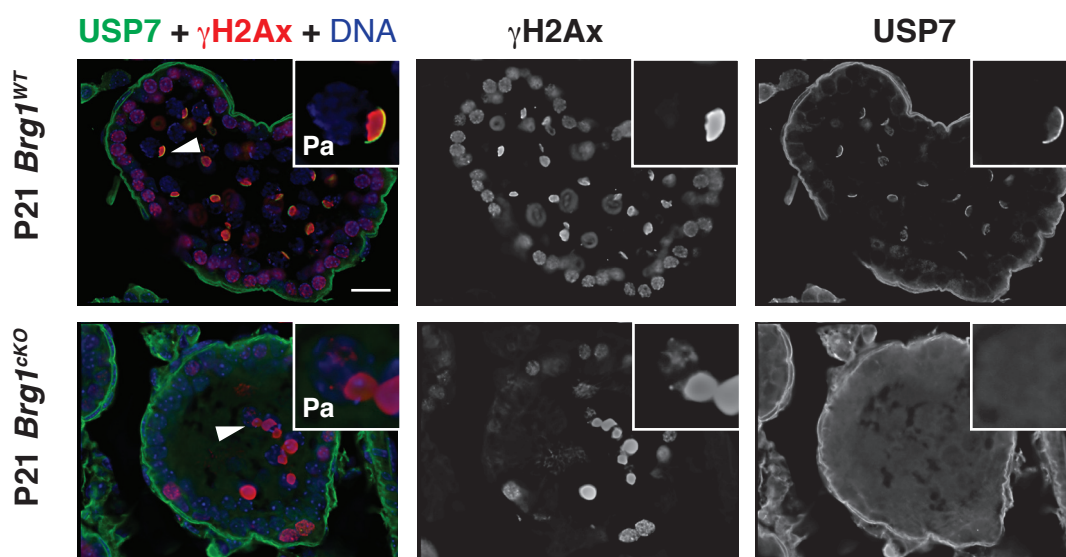

C

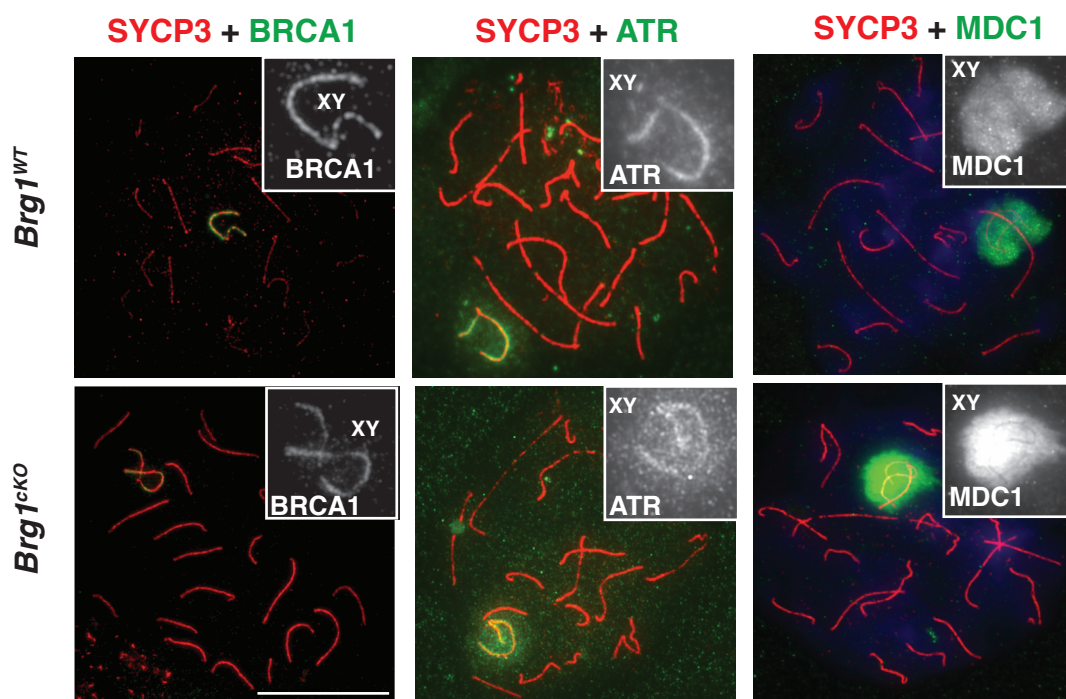

A

bioRxiv preprint doi: <https://doi.org/10.1101/476143>; this version posted November 26, 2018. The copyright holder for this preprint (which was not certified by peer review) is the author/funder, who has granted bioRxiv a license to display the preprint in perpetuity. It is made available under aCC-BY-NC-ND 4.0 International license.

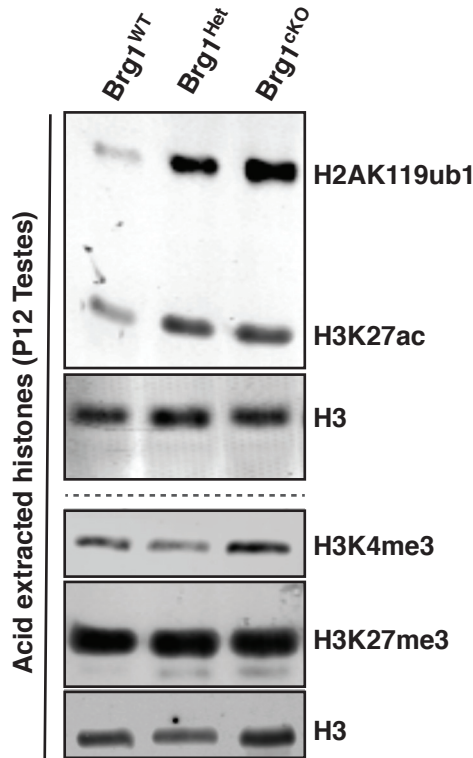

B

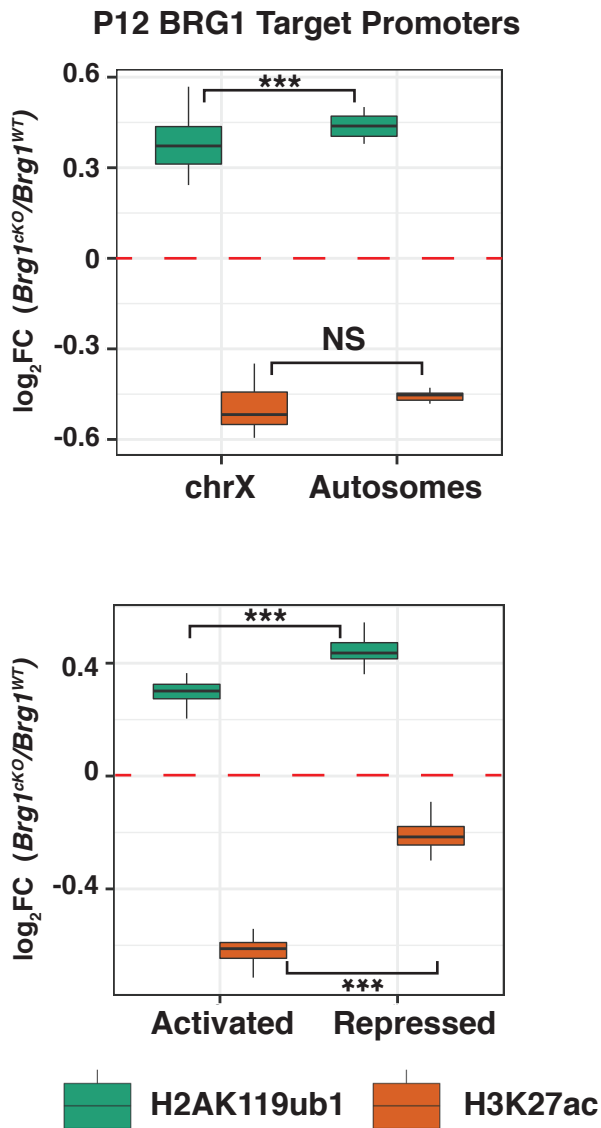

C

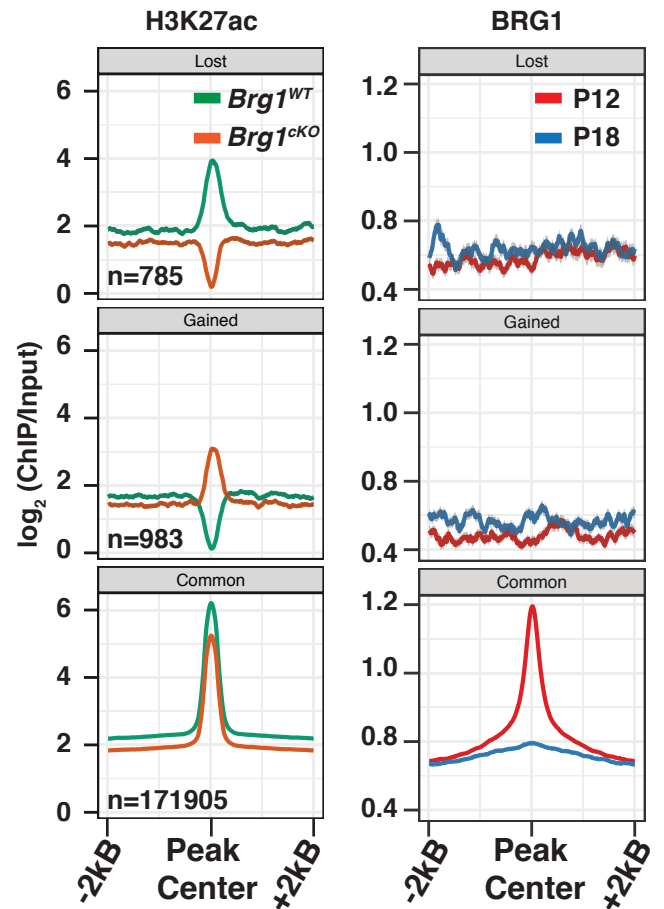

D

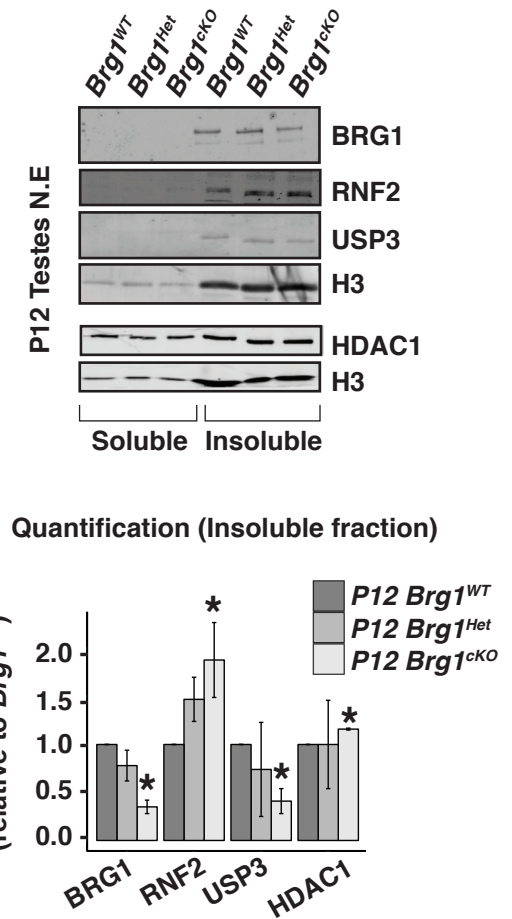

A

bioRxiv preprint doi: <https://doi.org/10.1101/476143>; this version posted November 26, 2018. The copyright holder for this preprint (which was not certified by peer review) is the author/funder, who has granted bioRxiv a license to display the preprint in perpetuity. It is made available under aCC-BY-NC-ND 4.0 International license.

### BRG1 co-ordinates spermatogenic gene expression

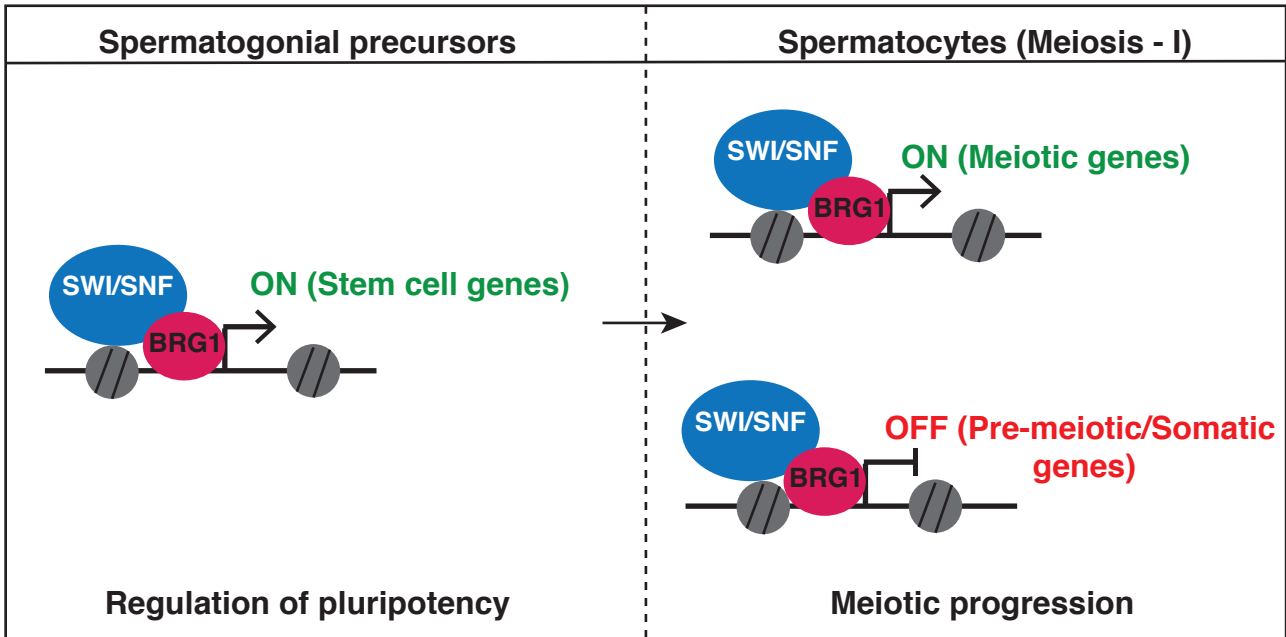

B

### BRG1 collaborates with SCML2 to regulate meiotic transcription

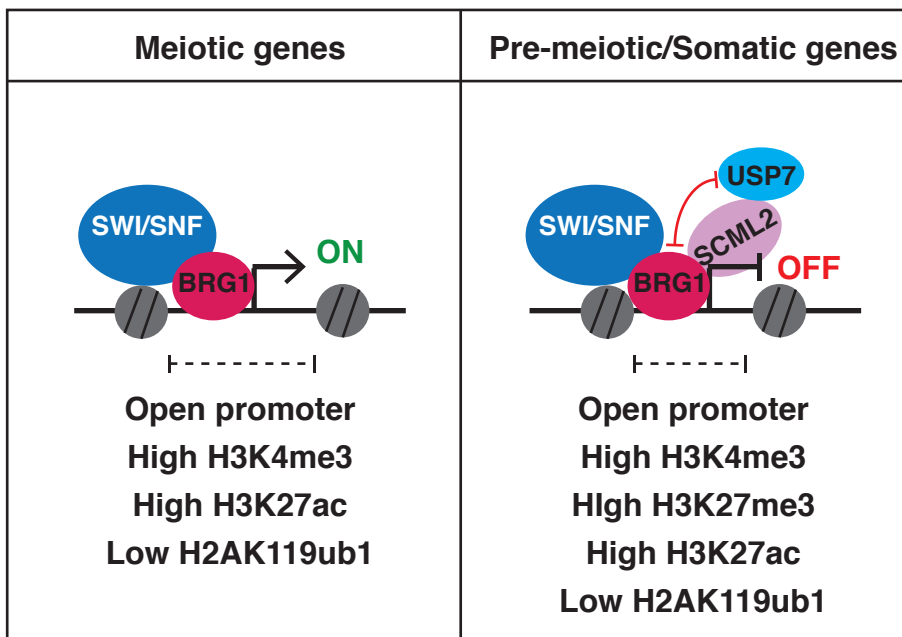

## **Supplemental Information**

### **Mammalian SWI/SNF collaborates with a polycomb-associated protein to regulate male germ line transcription in the mouse**

Debashish U. Menon, Yoichiro Shibata, Weipeng Mu and Terry Magnuson

Department of Genetics, and Lineberger Comprehensive Cancer Center, The University of North Carolina at Chapel Hill, Chapel Hill, North Carolina, NC 27599-7264, USA

\*Correspondence: [trm4@med.unc.edu](mailto:trm4@med.unc.edu), Tel 919-962-1319, Fax 919-843-4682

#### **List of supplemental information:**

#### **Supplemental figures S1-S10**

**Figure S1.** Features of BRG1 genomic associations.

**Figure S2.** Transcriptional response to the loss of BRG1 in the male germ line.

**Figure S3.** BRG1 directed changes in chromatin accessibility

**Figure S4.** Summary and validation of BRG1 interactions.

**Figure S5.** Features of BRG1 association with genes differentially regulated by SCML2.

**Figure S6.** Validation of the role of BRG1 in the recruitment of SCML2 to the sex body.

**Figure S7.** Analysis of SCML2 localization in meiotic spreads



**Figure S8.** Temporal regulation of H2AK119ub1 in testes and validation of anti- H2AK119ub1 (clone E6C5).

**Figure S9.** Genomic associations of lost, gained and common H3K27ac peaks.

**Figure S10.** BRG1 regulates the expression of epigenetic modifiers of H2AK119ub1, H2BK120ub1 and H3K27ac.

### **Supplemental tables**

**Table S1.** List of genes differentially regulated by BRG1 at P12 (Excel sheet).

**Table S2.** List of regions displaying significant differences in chromatin accessibility in the *Brg1<sup>CKO</sup>* relative to *Brg1<sup>WT</sup>* (Excel sheet).

**Table S3.** List of BRG1 ChIP-seq peak calls and the genomic location of sites differentially bound by BRG1 between P12 and P18 testes (Excel sheet).

**Table S4.** List of antibodies used in this study

**Table S5.** Sequences of qRT-PCR primers used in this study

### **Supplemental figure legends**

**Figure S1.** Features of BRG1 genomic associations. (A) Annotation of regions associated with P12 and P18 BRG1 peaks. Number (n) of P12 and P18 peaks are indicated within parenthesis. (B) Distribution of temporal expression profile of genes associated with class 1-3 TSS's. PMei: pre-meiotic, Mei: Meiotic, Const: constant. (C) UCSC genome browser views depicting H3K4me3 and H3K27me3 peak associations with promoters of candidate BRG1 target genes. Thick black bars denote BRG1 Macs2 peak calls. (D) P12 (green line) and P18 (orange line) BRG1 enrichment across an 8 Kb window centered at PRDM9 peaks (purple line).

**Figure S2.** Transcriptional response to the loss of BRG1 in the male germ line. (A) Quantification of spermatocyte populations per tubule (left panel) staged by  $\gamma$ H2Ax immunostaining of *Brg*<sup>WT</sup> and *Brg1*<sup>CKO</sup> cryosections obtained from P10, P13 and P14 testes. The total number of tubules analyzed (n) at each stage is indicated. Abundance (right panel) of spermatogonial and meiotic sub stage specific protein-coding genes (x-axis) between P12 *Brg*<sup>WT</sup> (red box) and *Brg1*<sup>CKO</sup> (blue boxes). Transcript abundance is expressed as the Log2 value of counts per million (CPM) added with a pseudo count (y-axis). (B) Quantitative RT-PCR analysis to determine the transcript abundance (y-axis) of candidate stem cell factors (x-axis) in *Brg*<sup>Het</sup> and *Brg1*<sup>CKO</sup> relative to *Brg*<sup>WT</sup> spermatogonia (THY1<sup>+</sup>). The transcript abundance of candidate factors was normalized to genes whose transcript levels are constantly expressed (*Sdha* and *Ywhaz*). \* denotes a p-value < 0.05, calculated using an unpaired students t-test. (C) Western blot showing the abundance of SYCP2 in sub-cellular fractions obtained from P12 *Brg*<sup>Het</sup> and *Brg1*<sup>CKO</sup> spermatogenic cells. Histone- H3 was used as a nuclear loading control. (D) *Brg*<sup>WT</sup> and *Brg1*<sup>CKO</sup> zygotene spermatocytes immunofluorescently labeled for SYCP2 (red) and SYCP3 (green). Images were captured using a 100x objective Scale bar: 10  $\mu$ m. (E) Western blot showing the abundance of PDGFRA in cytosolic fractions obtained from P12, P14, P21 *Brg*<sup>WT</sup>, *Brg*<sup>Het</sup> and *Brg1*<sup>CKO</sup> spermatogenic cells.  $\alpha$  TUBULIN was used as a loading control.

**Figure S3.** BRG1 directed changes in chromatin accessibility (A) Metaplots (top) and corresponding heatmaps (bottom) depicting the pairwise comparisons of normalized ATAC-seq signal at RefSeq genes  $\pm$  2Kb, between P12 *Brg1*<sup>WT</sup> and *Brg1*<sup>CKO</sup> spermatogenic cells, P18 *Brg1*<sup>WT</sup> and *Brg1*<sup>Het</sup> (*Brg1*<sup>fl/Δ</sup>) spermatogenic cells. TSS: Transcription start site, TES: Transcription end site. (B) UCSC browser view of candidate closed and opened regions.

**Figure S4.** Summary and validation of BRG1 interactions. (A) List of known SWI/SNF subunits identified by IP-MS that are common to BAF and PBAF subcomplexes. (B) Validation of SCML2 antibody (1D12) specificity on nuclear extracts prepared from testes, ovaries and purified spermatogenic cells. Nucleolin (NCL) was used as a nuclear marker. (C) Co-immunoprecipitation of BRG1 and USP7. Nonspecific IgG was used as negative control. All lysates were treated with 25 U of universal nuclease (benzonase) prior to IP.

**Figure S5.** Features of BRG1 association with genes differentially regulated by SCML2. (A) ATAC seq coverage from P12 *Brg1<sup>WT</sup>* and *Brg1<sup>ckO</sup>* at TSS  $\pm$  4 Kb, associated with genes regulated by SCML2 in pachytene spermatocytes. (B) Enriched gene ontology terms associated with genes concordantly activated or repressed by BRG1 (P12) and SCML2 (pachynema).

**Figure S6.** Validation of the role of BRG1 in the recruitment of SCML2 to the sex body. Cryosections prepared from (A) P14 and P21 *Brg1<sup>WT</sup>* and *Brg1<sup>ckO</sup>* testes, immunofluorescently labeled for SCML2 (cyan), BRG1(red) and ATR (green), (B) P14 *Brg1<sup>WT</sup>* and *Brg1<sup>Het</sup>* testes, immunofluorescently labeled for SCML2 (green) and  $\gamma$ H2Ax (red), DNA was stained with DAPI. Arrowheads label pachytene spermatocytes with completely formed sex body. Images were captured using a 63x objective. Scale bar: 20  $\mu$ m.

**Figure S7.** Analysis of SCML2 localization in meiotic spreads. Pachytene spermatocyte from *Mvh-Cre* (left panel) and *Stra8-Cre* (right panel) induced *Brg1<sup>ckO</sup>* and *Brg1<sup>WT</sup>* testes, immunofluorescently labeled for SCML2 (green) and SYCP3 (red). Arrowheads denote the sex chromosomes and dotted circle outlines the SCML2 signal around the sex body. Images were captured using a 100x objective. Scale bar: 20  $\mu$ m.

**Figure S8.** Temporal regulation of H2AK119ub1 in testes and validation of anti- H2AK119ub1 (clone E6C5) . (A) Western blot depicting H2AK119ub1, H3K27ac abundance in acid extracted histones obtained from P8,P10 *Brg1<sup>WT</sup>*, *Brg1<sup>Het</sup>* and *Brg1<sup>ckO</sup>* testes. H3 was used as a loading control (B) Western blot showing H2AK119ub1 and H3 abundance in acid extracted histones obtained from testes of P12 wild type mice carrying a *Mvh-Cre* transgene and their littermate controls (+/+). (C) Validation of anti-H2AK119ub1 (clone E6C5) specificity by immunoblotting for total H2AK119ub1 in acid extracted histones obtained from *Rnf2<sup>WT</sup>* and two different *Rnf2<sup>ckO</sup>* ES cell lines. Blots were stained with Ponceau S to show total histone levels. (D) Western blot using anti-H2AK119ub1 (clone E6C5), to show H2AK119ub1 (green) levels in sub-cellular fractions of spermatogenic cells obtained from P12 *Brg1<sup>WT</sup>*, *Brg1<sup>Het</sup>* and *Brg1<sup>ckO</sup>* testes. H3 (red) was used as nuclear loading control. Dotted rectangle labels the nuclear levels of H2AK119ub1 levels. L: ladder.

**Figure S9.** Genomic associations of lost, gained and common H3K27ac peaks.

**Figure S10.** BRG1 regulates the expression of epigenetic modifiers of H2AK119ub1, H2BK120ub1 and H3K27ac. (A) UCSC browser view depicting BRG1 occupancy at *Rnf2*, *Usp3*, *Hdac1* and *Hdac2* promoters. Thick black bars label BRG1 peaks. (B) Transcript abundance (y-axis) of *Rnf2*, *Usp3*, *Hdac1* and *Hdac2* in P12 *Brg1*<sup>WT</sup> (red box) and *Brg1*<sup>CKO</sup> (blue box). Transcript abundance is expressed as the Log<sub>2</sub> value of normalized abundance in counts per million (CPM) added with a pseudo count. (C) Western blot depicting H2BK120ub1 levels in acid extracted histones obtained from P12 *Brg1*<sup>WT</sup>, *Brg1*<sup>Het</sup> and *Brg1*<sup>CKO</sup> testes. H3 was used as a loading control.

bioRxiv preprint doi: <https://doi.org/10.1101/476143>; this version posted November 26, 2018. The copyright holder for this preprint (which was not certified by peer review) is the author/funder, who has granted bioRxiv a license to display the preprint in perpetuity. It is made available under aCC-BY-NC-ND 4.0 International license.

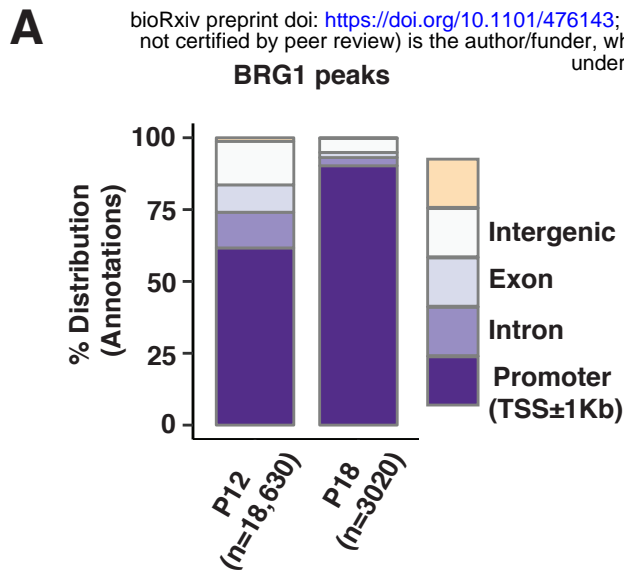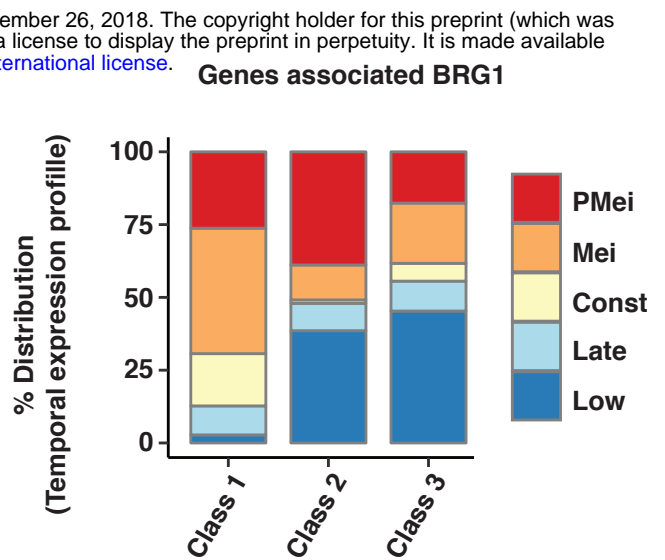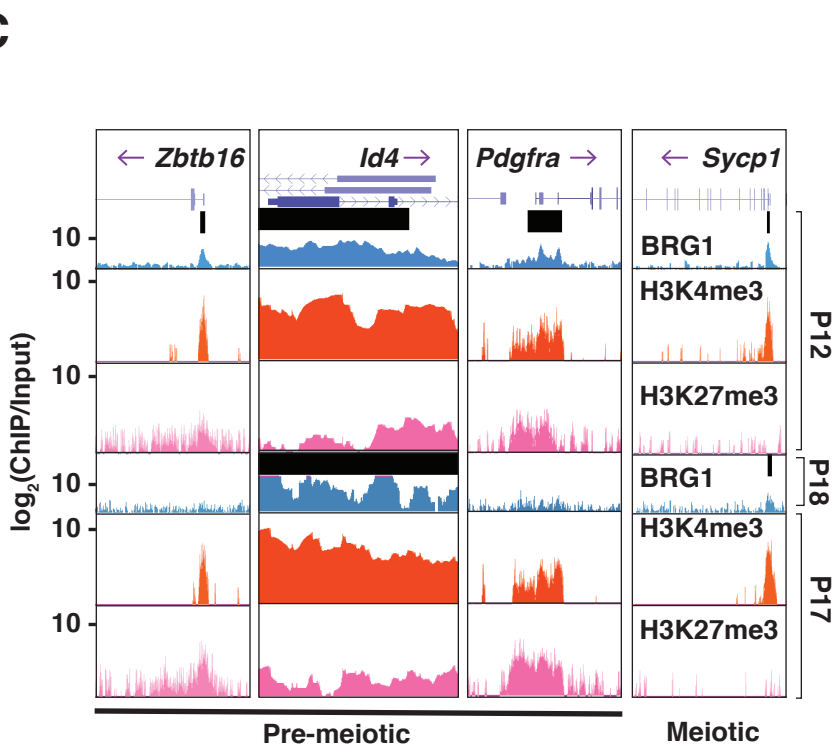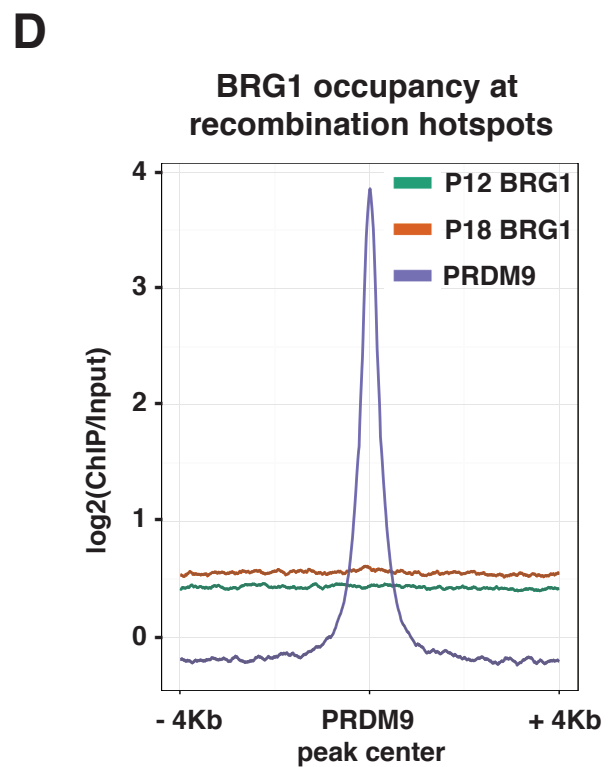

bioRxiv preprint doi: <https://doi.org/10.1101/476143>; this version posted November 26, 2018. The copyright holder for this preprint (which was not certified by peer review) is the author/funder, who has granted bioRxiv a license to display the preprint in perpetuity. It is made available under aCC-BY-NC-ND 4.0 International license.

**A**

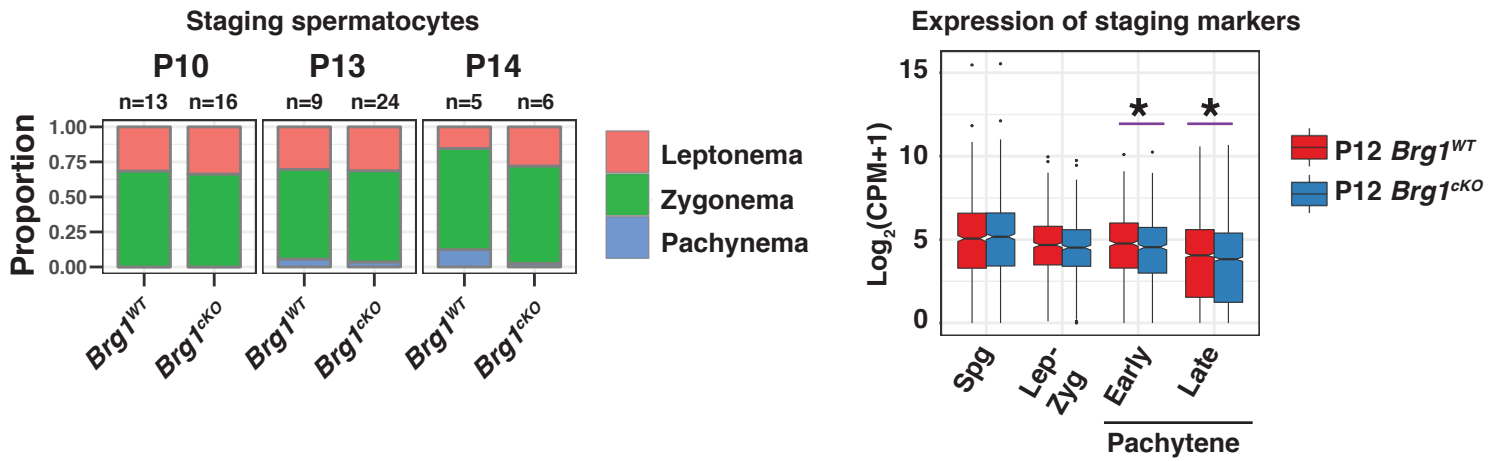

**B**

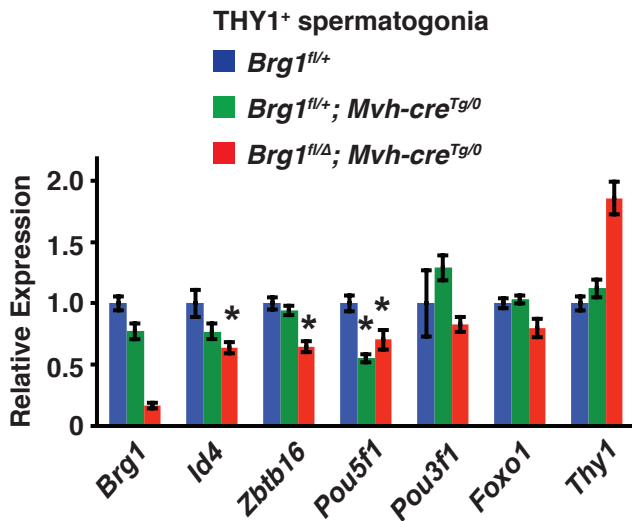

**D**

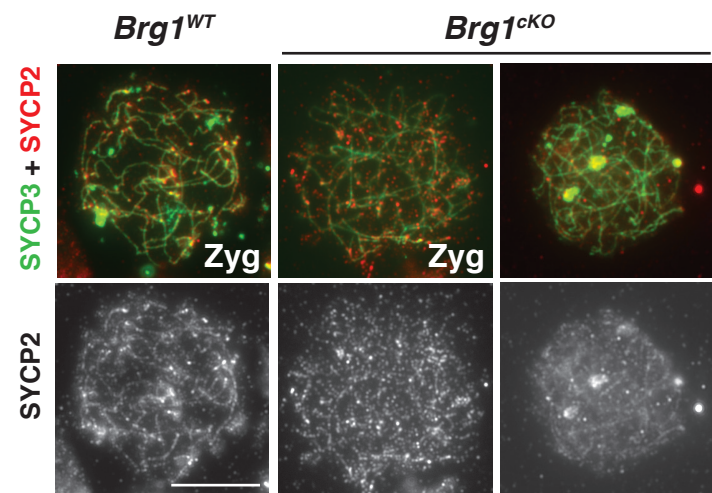

**C**

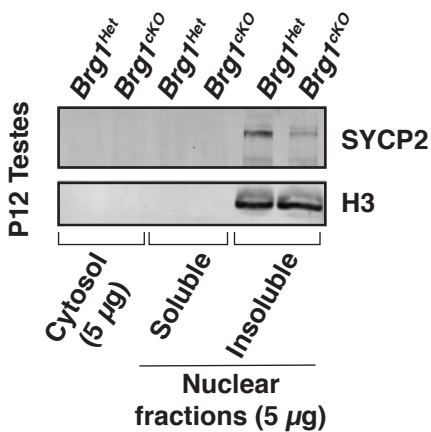

**E**

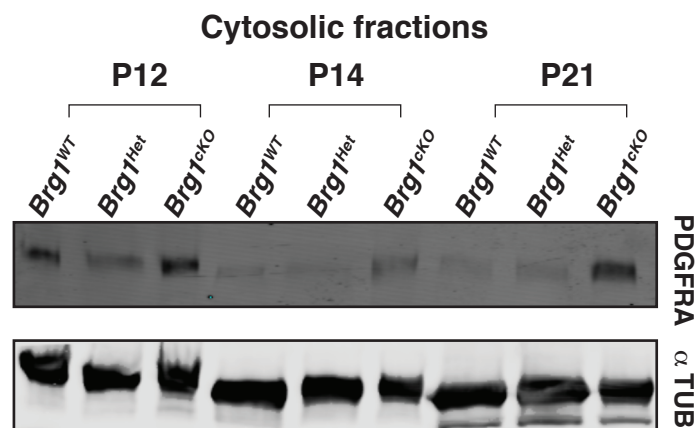

bioRxiv preprint doi: <https://doi.org/10.1101/476143>; this version posted November 26, 2018. The copyright holder for this preprint (which was not certified by peer review) is the author/funder, who has granted bioRxiv a license to display the preprint in perpetuity. It is made available under aCC-BY-NC-ND 4.0 International license.

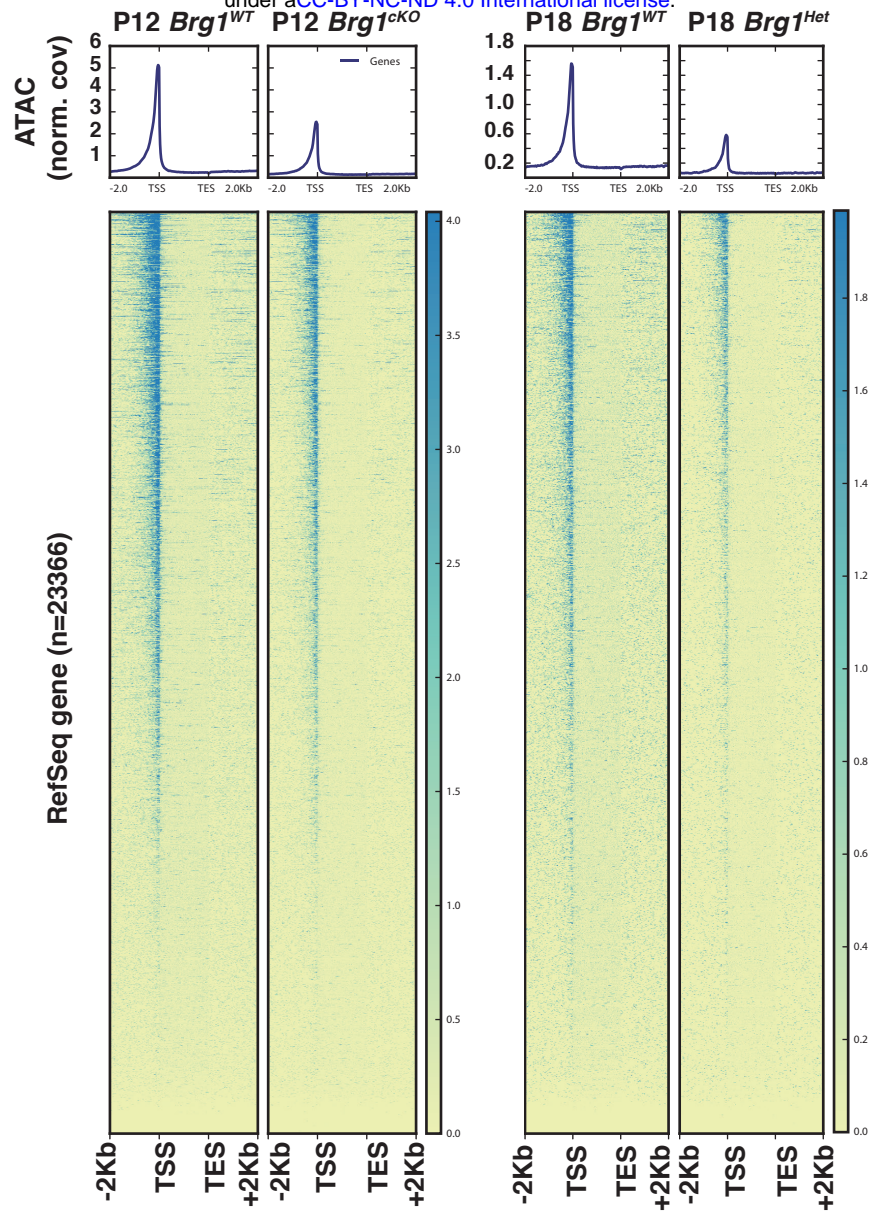

**B**

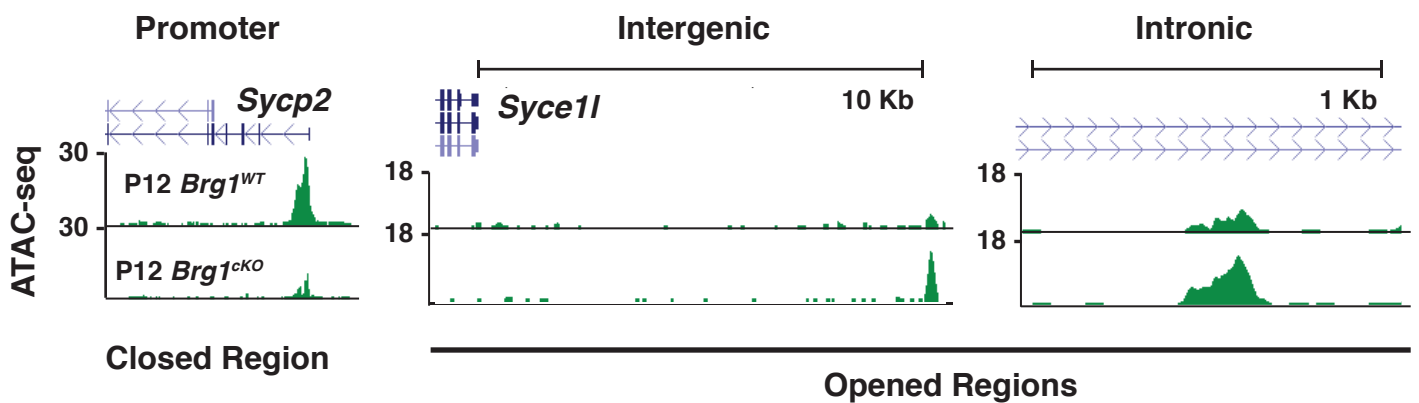

bioRxiv preprint doi: <https://doi.org/10.1101/476143>; this version posted November 26, 2018. The copyright holder for this preprint (which was not certified by peer review) is the author/funder, who has granted bioRxiv a license to display the preprint in perpetuity. It is made available under aCC-BY-NC-ND 4.0 International license.

A

|                          | Protein | # Unique Peptide | % Coverage |
|--------------------------|---------|------------------|------------|
| Shared SWI/SNF sub units | BAF60A  | 37               | 82         |
|                          | BAF60B  | 26               | 60         |
|                          | BAF60C  | 19               | 45         |
|                          | BAF45A  | 14               | 36         |
|                          | BAF45B  | 10               | 38         |
|                          | BAF45C  | 8                | 33         |
|                          | BAF45D  | 15               | 49         |
|                          | BAF57   | 20               | 51         |
|                          | BAF53A  | 22               | 55         |

B

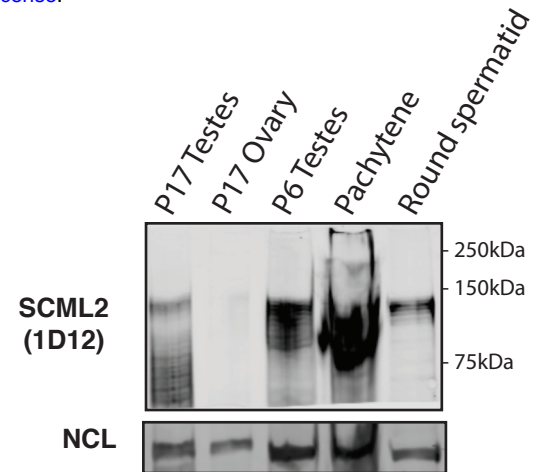

C

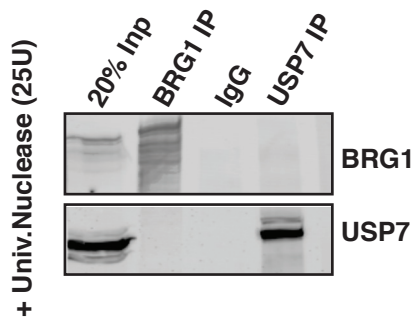



bioRxiv preprint doi: <https://doi.org/10.1101/476143>; this version posted November 26, 2018. The copyright holder for this preprint (which was not certified by peer review) is the author/funder, who has granted bioRxiv a license to display the preprint in perpetuity. It is made available under aCC-BY-NC-ND 4.0 International license.

## A

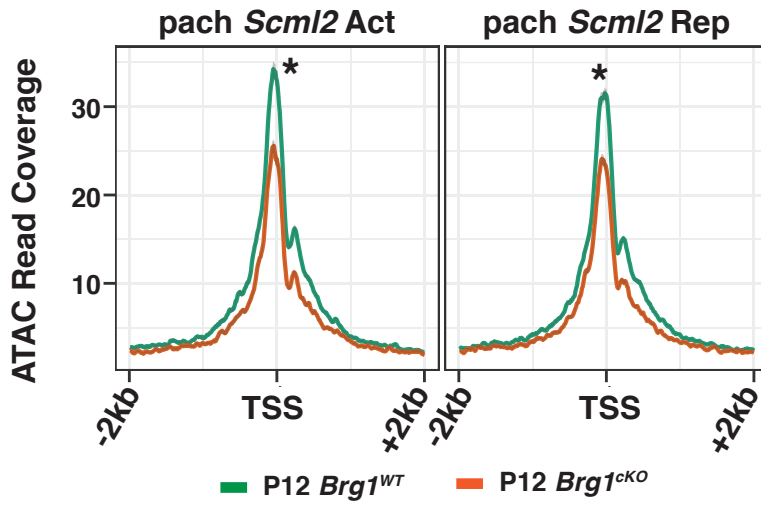

## B

### Enriched GO terms - Concordant genes

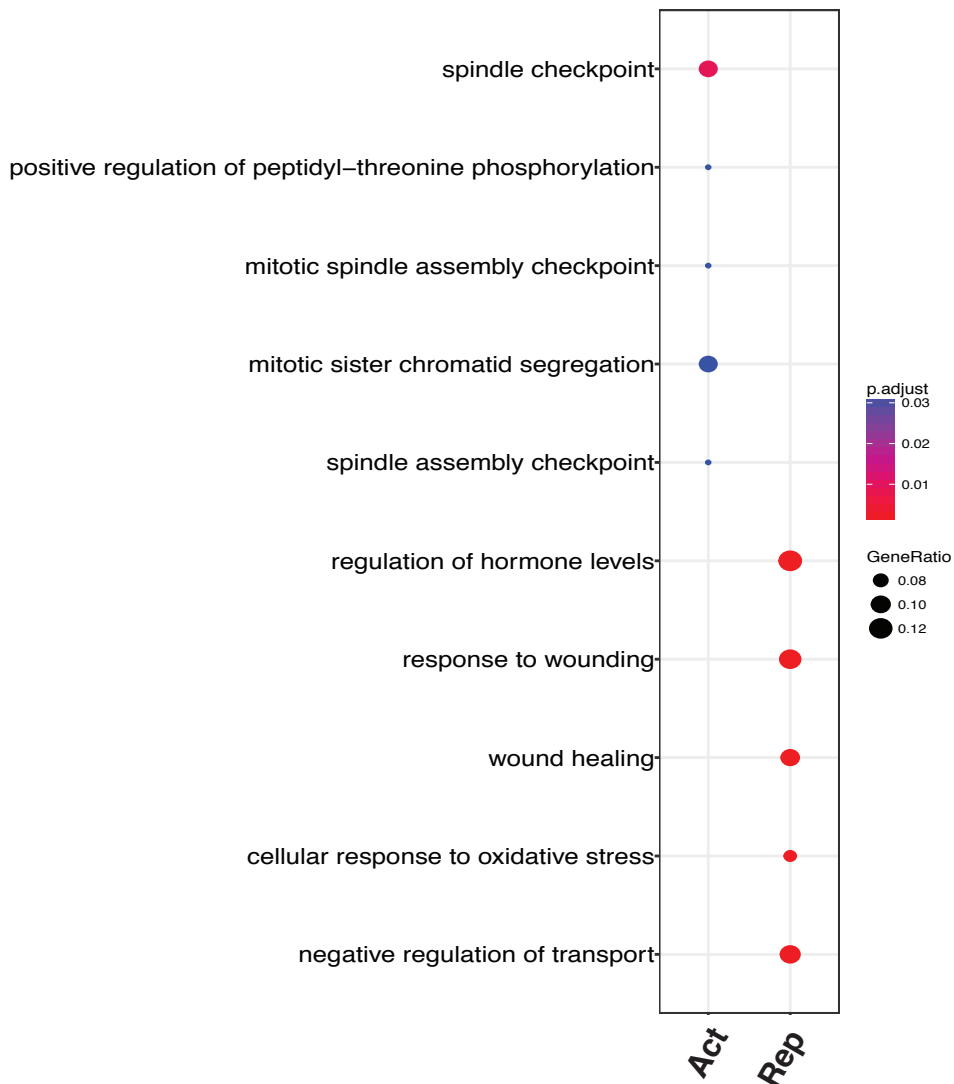

A

bioRxiv preprint doi: <https://doi.org/10.1101/476143>; this version posted November 26, 2018. The copyright holder for this preprint (which was not certified by peer review) is the author/funder, who has granted bioRxiv a license to display the preprint in perpetuity. It is made available under aCC-BY-NC-ND 4.0 International license.

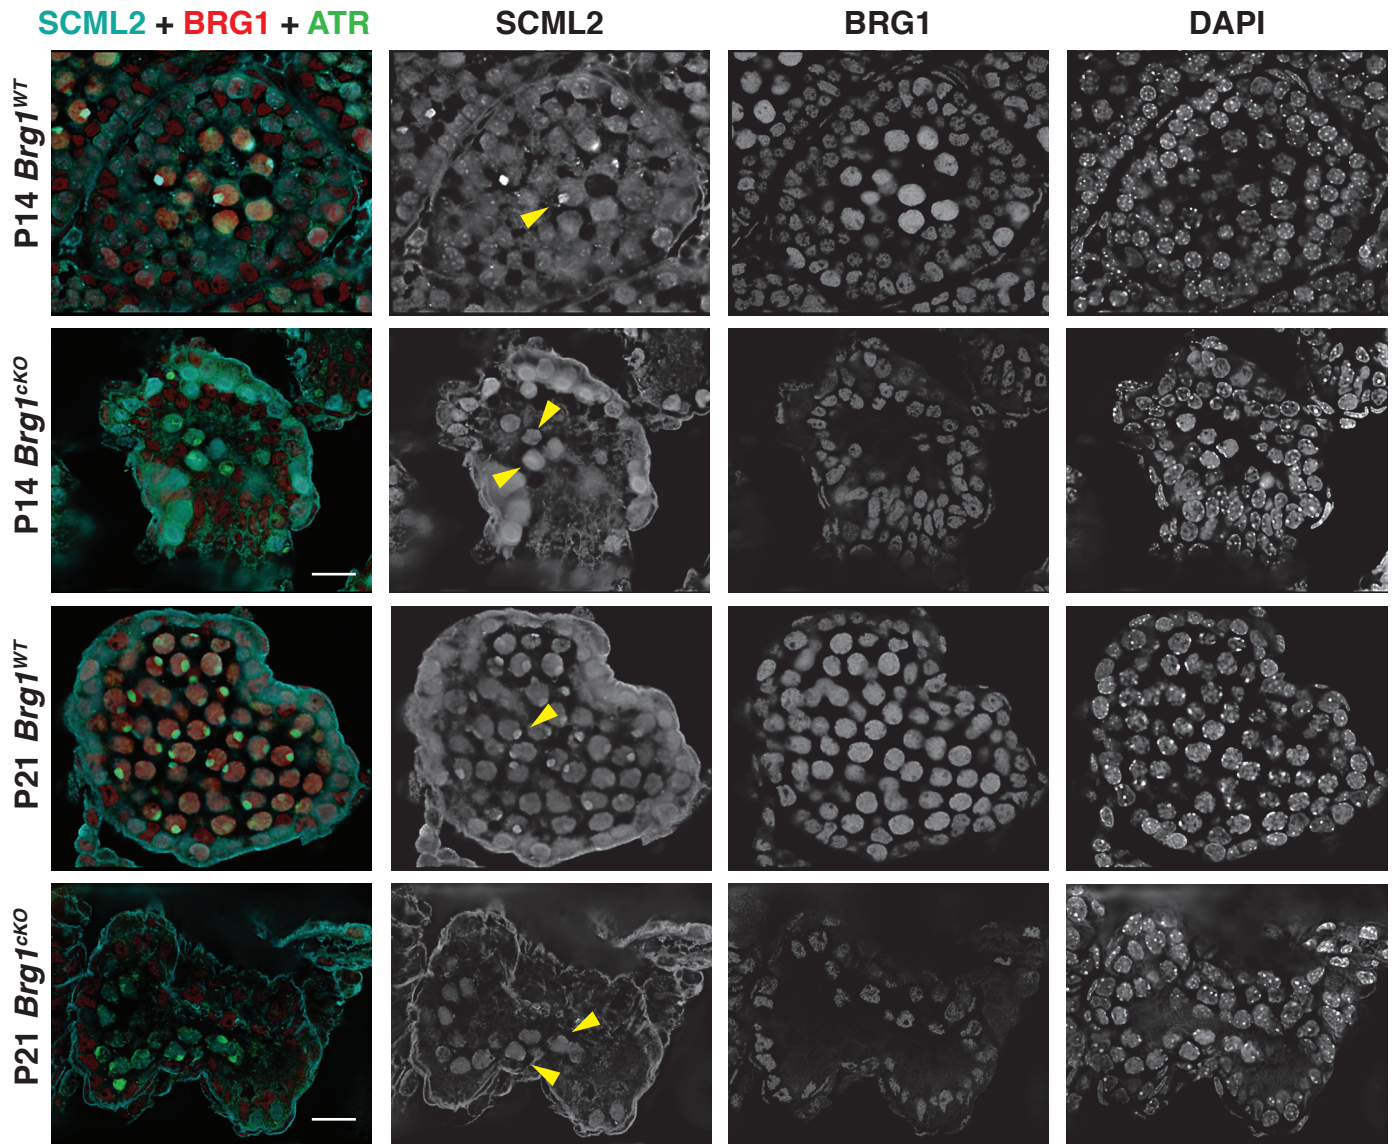

B

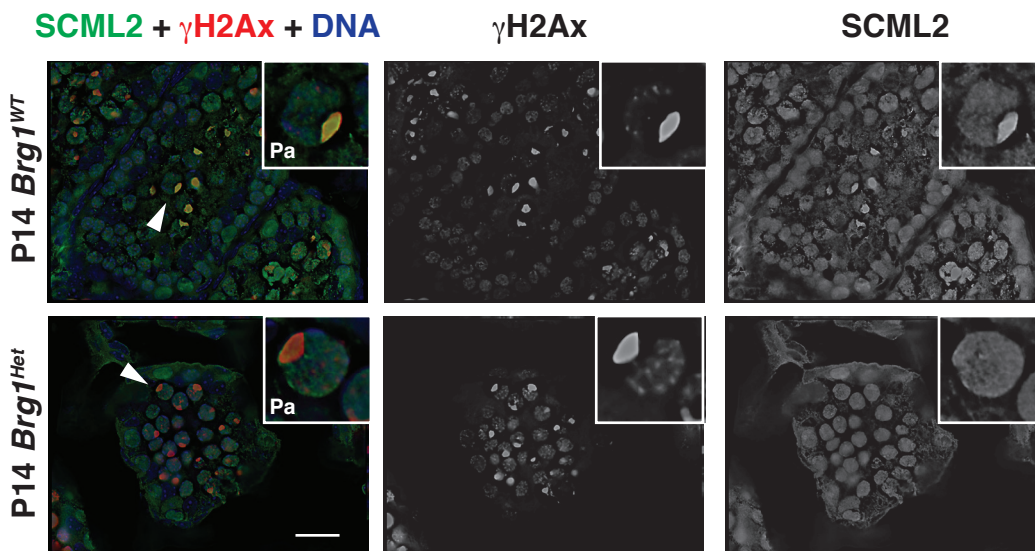

# Supplemental\_Figure\_S7.pdf

bioRxiv preprint doi: <https://doi.org/10.1101/476143>; this version posted November 26, 2018. The copyright holder for this preprint (which was not certified by peer review) is the author/funder, who has granted bioRxiv a license to display the preprint in perpetuity. It is made available under aCC-BY-NC-ND 4.0 International license.

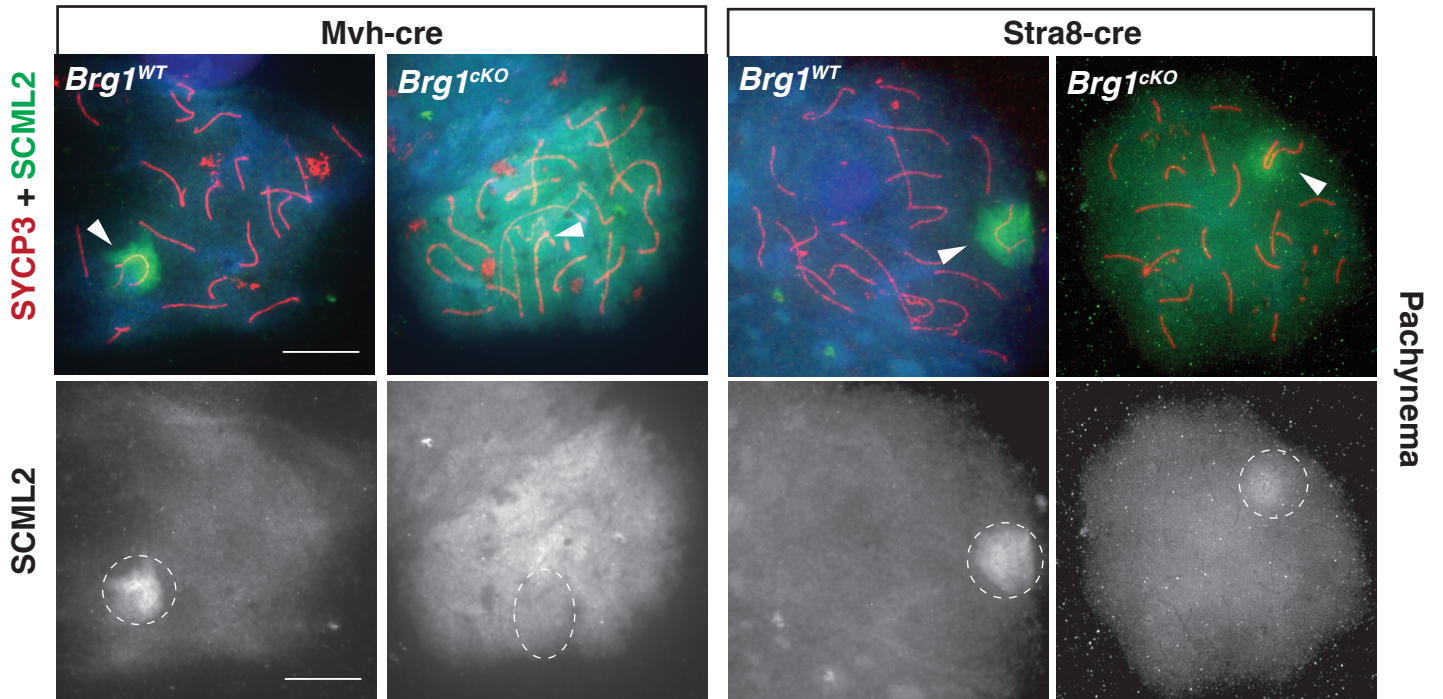

bioRxiv preprint doi: <https://doi.org/10.1101/476143>; this version posted November 26, 2018. The copyright holder for this preprint (which was not certified by peer review) is the author/funder, who has granted bioRxiv a license to display the preprint in perpetuity. It is made available under aCC-BY-NC-ND 4.0 International license.

## A

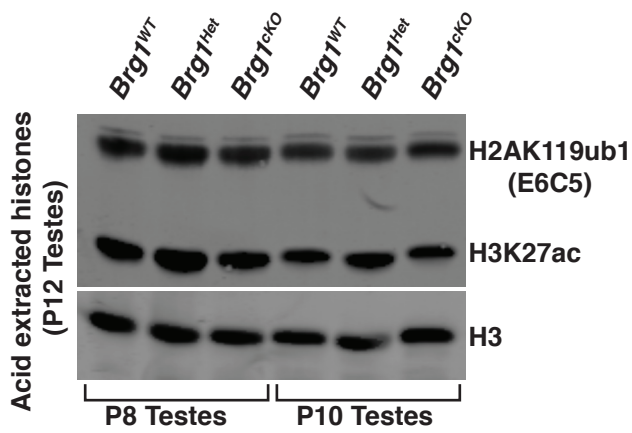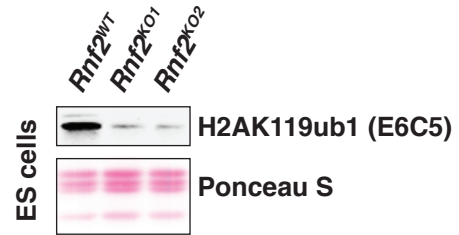

## B

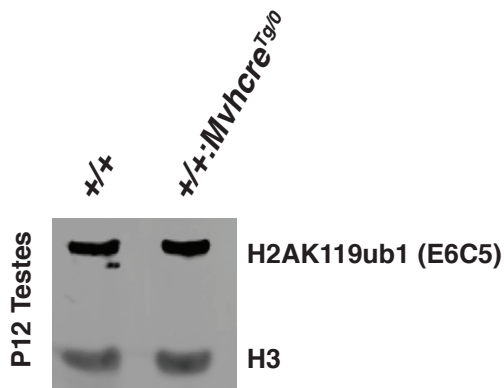

## D

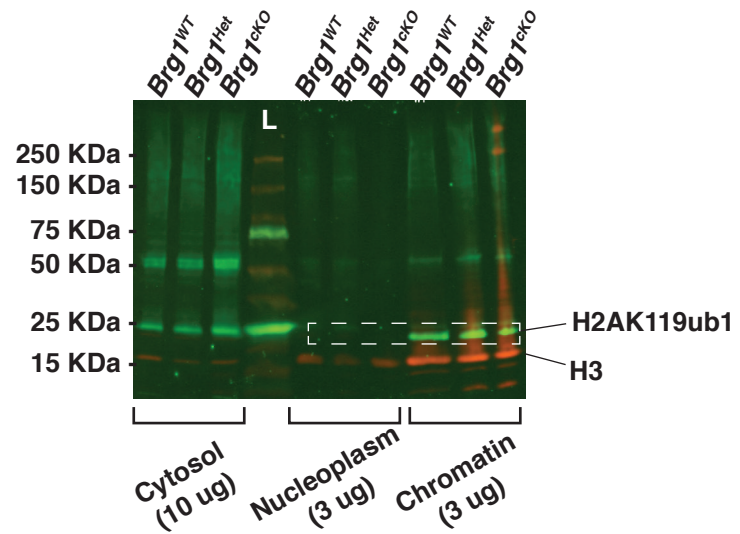

bioRxiv preprint doi: <https://doi.org/10.1101/476143>; this version posted November 26, 2018. The copyright holder for this preprint (which was not certified by peer review) is the author/funder, who has granted bioRxiv a license to display the preprint in perpetuity. It is made available under aCC-BY-NC-ND 4.0 International license.

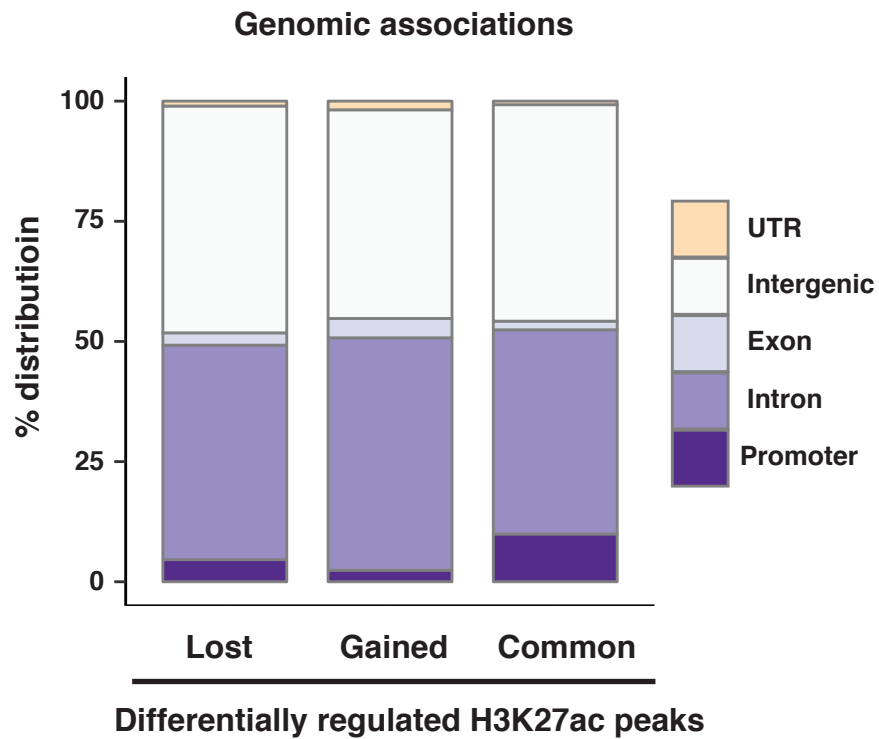

bioRxiv preprint doi: <https://doi.org/10.1101/476143>; this version posted November 26, 2018. The copyright holder for this preprint (which was not certified by peer review) is the author/funder, who has granted bioRxiv a license to display the preprint in perpetuity. It is made available under aCC-BY-NC-ND 4.0 International license.

**A**

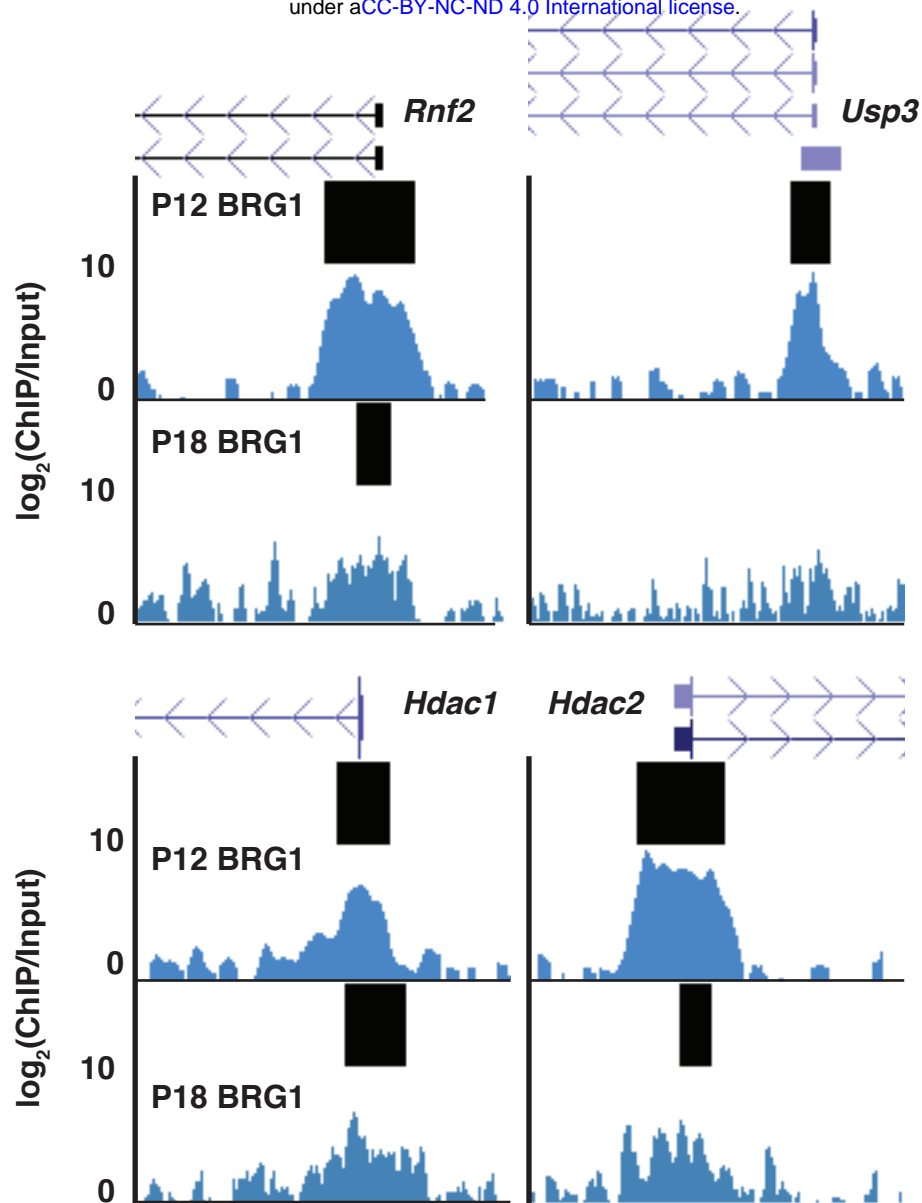

**B**

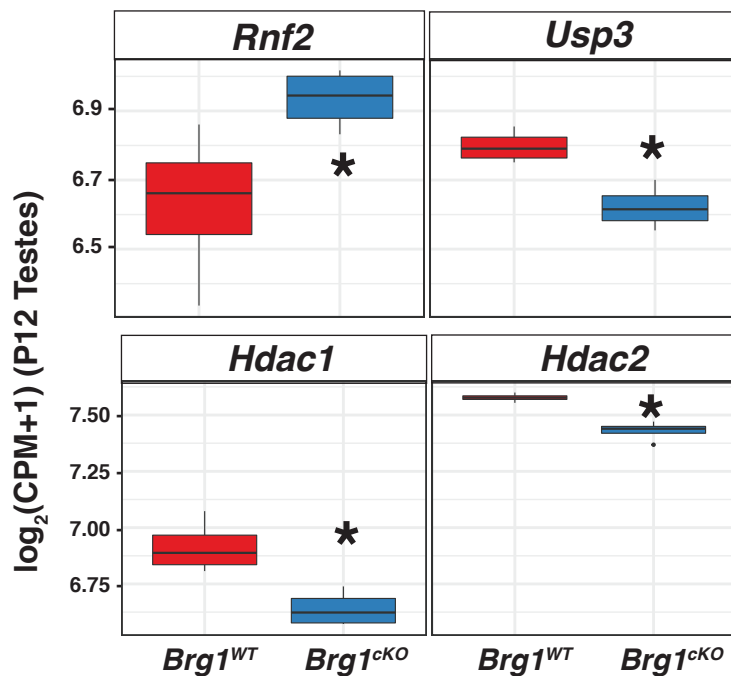

**C**

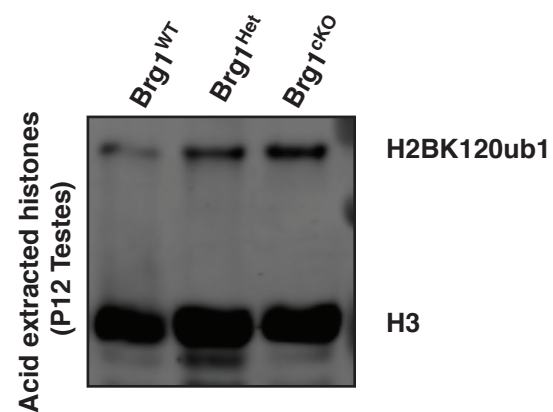

## **Supplemental Materials**

### **ChIP from low input chromatin:**

Spermatogenic cells obtained from 12-day-old *Brg1*<sup>WT</sup> and *Brg1*<sup>ckO</sup> mice were fixed as described (Raab et al., 2015). Frozen pellets (10<sup>6</sup> cells each) were thawed on ice and then resuspended in 50 µl of nuclear isolation buffer (Sigma NUC-101). For the H3K27ac ChIPs, 5mM sodium butyrate was added to the nuclear suspensions. Samples were mixed by pipetting the cell suspension 15-20 times. 50 µl of nuclear preparations were mixed with 10 µl of MNase digestion buffer [6x MNase buffer (NEB), 8.8 mM DTT, 12 gel units MNase (NEB)] and incubated at 37 C for 15 minutes. The digestion was stopped by adding 1/10<sup>th</sup> volume of 100 µM EDTA (Ethylenediaminetetraacetic acid). 6.6 µl of a 1% Triton X-100/1% sodium deoxycholate solution was added to the digested chromatin and vortexed gently for 30 seconds after which the samples were held on ice until the next step. In the meantime the DNA content of each chromatin preparation was quantified from 5 ul of chromatin. Briefly, chromatin was mixed with 95 µl H<sub>2</sub>O and 100 µl 10% chelex-100 (Bio-Rad) and incubated at 95 C for 10 min. Following RNaseA digestion for 15 min at 37 C, ProteinaseK digestion for 1 hr at 56 C, the DNA was purified using ChIP-DNA clean and concentrator kit (Zymo) and quantified on a qubit. This way we ensured that for each pairwise comparison (wild type versus mutant ChIP), we began with an equal amount of input. We started with 145 ng and 285 ng of input DNA for each H3K27ac and H2AK119ub1 ChIP respectively. Digested chromatin was mixed with complete immunoprecipitation (IP) buffer (20mM Tris-HCl pH 8.0, 2mM EDTA, 150 mM NaCl, 0.1% Triton X-100, 1x Protease inhibitor cocktail -PIC, 1mM Phenylmethanesulfonyl fluoride -PMSF) such that it comprised less than 25 % of the total volume. Chromatin was pre-cleared with 10 ul of magnetic Protein A (Bio-Rad) or G (Invitrogen/Dynalbeads) beads for 1 hour on a rotator at 4 C. After pre-clearing, 10% chromatin was set aside as input. Pre-cleared lysates were then mixed with antibodies to perform the ChIP. 5µg of rabbit anti-H3K27ac (Active Motif – 39133) conjugated to Protein A beads (Bio-Rad) and 10 µg of mouse anti-H2AK119ub1 IgM antibodies (Millipore E6C5, 05-678) were added to the lysates and left to bind chromatin by rotating the tubes overnight at 4 C. The following day anti-mouse IgM (Millipore, 12-488) conjugated to proteinA/G beads were added to the H2AK119ub1 ChIP samples and rotated at 4 C for 3 hours to capture anti-H2AK119ub1 bound chromatin. Chromatin bound to bead-antibody conjugates from all ChIP samples were isolated using a magnetic separator. Beads were then washed twice in low salt buffer followed by two washes in high salt buffer and eventually re-suspended in 100 µl of elution buffer (1%SDS/100mM NaHCO<sub>3</sub>) in a 1.5 ml eppendorf tube. DNA was

eluted at 65 C on a shaking incubator (Eppendorf) at 800 rpm for 30 min. Eluate was separated from beads on a magnetic separator. 5 µl of 5M NaCl was added to eluate and incubated in 65 C water bath overnight to reverse crosslinks. ChIP DNA was digested with RNaseA for 30 min at 37 C followed by ProteinaseK digestion for 1 hr at 56 C and then purified using a ChIP-DNA clean and concentrator kit (Zymo) and quantified with a qubit. Libraries were prepared from ChIP and Input samples using the Kapa Hyperprep kit.

### **ChIP-seq data analysis:**

Reads were aligned to mm9 using bowtie/bowtie2 (Langmead and Salzberg, 2012; Langmead et al., 2009). The resulting sam output files were converted to the BAM format using Samtools, version 1.6.0 (Li et al., 2009). The bam files were filtered to remove PCR duplicates using Picard tools, MarkDuplicates (<http://broadinstitute.github.io/picard>). The BAM files were converted to bigwig files for visualization on the UCSC browser (Kent 2002). The bigwig files were generated using DeepTools (Ramírez et al., 2016), bamCompare with a bin size of 10 bp ,extending fragments to 150bp (nucleosome size), filtered for mm9 blacklisted regions and normalized to 1X depth of coverage. Each bigwig file represents the log<sub>2</sub> ratio of ChIP to the corresponding Input sample. For comparison across samples the bigwig files were normalized to effective library size. Replicates were merged into a single bigwig using UCSC tools, bigWigMerge (<http://hgdownload.soe.ucsc.edu/admin/exe/>). Read coverage over regions of interest were generated from matrix files generated using DeepTools, computeMatrix following which metagene plots were made in R using ggplot2 (Wilkinson, 2011). Peaks from each sample were called using Macs2, version2.1.0, (Zhang et al., 2008) in broadpeak mode with --broad-cutoff 0.05 (FDR ≤ 0.05). Overlapping peaks between replicates were identified using bedtools, intersectBed and were used for subsequent analysis. A list of all BRG1 peak calls are provided (Table S3) Peaks were annotated using HOMER, peakannotate.pl (Heinz et al., 2010). Differential peak analysis was performed on bedgraph files using Macs2, bdgdiff run with default parameters.



### **ATAC-seq data analysis:**

Reads were aligned to the mm9 genome using bowtie, with following parameters: -S -q -m 1 -p 2 -best -strata -chunkmbs 256 (Langmead et al., 2009). The outputted sam files were converted to BAM files using Samtools version 1.3.1. Next Bedtools version 2.25.0 (Quinlan and Hall, 2010), bamtobed was used to convert BAM output files to bed file format to do the subsequent steps. BAM files were converted to bigWig files for visualization on UCSC browser and to generate metagene plots as described above (see supplementary materials on ChIP-seq data analysis).

### **Differential analysis of chromatin accessibility:**

For the differential analysis of chromatin accessibility, we adopted a method described for analyzing significant differences in counts between DNA hypersensitive sites identified by Dnase seq (Shibata et al., 2012). We compared differences in chromatin accessibility between 12 day old (P12) *Brg1*<sup>WT</sup> and *Brg1*<sup>CKO</sup> spermatogenic cells. Here the pairwise comparison was performed using edgeR, after obtaining the read counts from each replicate across defined 300 bp windows generated from a union set of the top 100,000 peaks (ranked by F-Seq). We called windows with significantly different counts from the pairwise comparison at a FDR  $\leq$  0.05. The significantly altered regions were annotated using HOMER, peakannotate.pl (Heinz et al., 2010). Regions with significant differences in open chromatin are provided (Table S2).

### **Preparation of nuclear lysates for immunoprecipitation:**

Spermatogenic cells isolated from 2- to 3-week-old males were washed once in PBS and centrifuged at 600g for 5 min at 4 C. The resulting cell pellet was re-suspended in 20 PCV (packed cell volumes) of buffer A (10mM HEPES-KOH pH7.9, 1.5mM MgCl<sub>2</sub>, 10mM KCl, 0.1% NP-40, 0.5mM DTT, 0.5mM PMSF, 1x PIC, 0.5) and left on ice to swell for 10 min. Cells were centrifuged at 600g for 5 min at 4 C, resuspended in 2 PCV of buffer A and then homogenized using a dounce (type B). The homogenate containing nuclei were centrifuged at 700g for 10 min at 4 C. Nuclear preparations were washed once again in 10 PCV of buffer A and pelleted at 5000 rpm for 10 min at 4 C. Lysates were extracted from pelleted nuclei at least twice for 1 hour each with an equal volume of high salt buffer C (20mM HEPES-KOH pH7.9, 1.5mM MgCl<sub>2</sub>,

420mM NaCl, 10mM KCl, 25 % glycerol, 0.2mM EDTA, 0.5mM DTT, 0.5mM PMSF, 1x PIC) on a nutator at 4 C. The resulting nuclear lysates were mixed with 2.8x volume of buffer D (20mM HEPES-KOH pH7.9, 20 % glycerol, 0.2mM EDTA, 0.5mM DTT, 0.5mM PMSF, 1x PIC) following which they were clarified by spinning at 14,000 rpm for 10 min at 4 C, pooled together and snap-frozen in liquid nitrogen and stored at -80 C until further use.

### **Co-Immunoprecipitation (Co-IP):**

100 µl of magnetic protein A beads were initially washed twice in PBS for 5 min each at 4 C followed by one wash in PBS + 0.5% BSA for 10 min at 4 C. The antibodies (tableS3) were then mixed with beads resuspended in 1x volume of PBS + 0.5% BSA and allowed to conjugate for at least 2 hr at 4 C. After this, antibody-bead conjugates were washed once with 500 µl of PBS + 0.5% BSA, followed by two washes in IP buffer (20mM HEPES-KOH pH7.9, 0.15mM KCl, 10 % glycerol, 0.2mM EDTA, 0.5mM DTT, 0.5mM PMSF, 1x PIC) for 5 min each at 4 C. The antibody-coupled beads were stored in IP buffer until the nuclear lysates were processed for IP. Briefly, the lysates were thawed on ice and centrifuged at 14,000 rpm at 4 C to remove any precipitates. 500 µg of nuclear lysate was diluted in IP buffer to make up the volume to 1.3 ml and then incubated with unconjugated protein A beads to pre-clear the lysate. A fraction of lysate was set aside as input and the remaining was transferred to a tube containing the antibody coupled beads and left on a rotator overnight at 4 C. The following day the protein bound antibody-bead conjugates were separated using a magnetic separator and washed on a rotator with a series of buffers in the following order at 4 C for 5 min each: twice in IP buffer, twice in high salt wash buffer (20mM HEPES-KOH pH7.9, 300mM KCl, 10 % glycerol, 0.2mM EDTA, 0.1 % Tween-20, 0.5mM DTT, 0.5mM PMSF, 1x PIC), twice in a low salt wash buffer (20mM HEPES-KOH pH7.9, 100mM KCl, 10 % glycerol, 0.2mM EDTA, 0.1 % Tween-20, 0.5mM DTT, 0.5mM PMSF, 1x PIC), once in final wash buffer (20mM HEPES-KOH pH7.9, 60mM KCl, 10 % glycerol, 0.5mM DTT, 0.5mM PMSF, 1x PIC). The proteins were eluted by resuspending the beads in 2X Laemmli buffer and incubating them at 70 C for 10 min followed by boiling the samples at 95 C for 5 min.

### **BRG1-IP and mass spectrometry:**

Prior to mass spectrometry the IPs were performed with anti-BRG1 antibody and non-specific IgG (table S4) as described above with a few modifications. After conjugation each antibody

was crosslinked to protein A beads with BS<sup>3</sup> (bis[sulfosuccinimidyl] suberate) crosslinking agent, prepared as per the manufacturer's instructions (Thermo scientific, 21585). Crosslinking with BS<sup>3</sup> significantly reduces IgG elution and improves signal to noise ratio in samples obtained by boiling beads in Laemlli buffer (Sousa et al., 2011). Briefly, antibody coupled beads were washed once in PBS for 5 min at 4 C, followed by two washes in conjugation buffer pH 7.9 (20 mM Sodium Phosphate, 0.15M NaCl ). The antibody-coupled beads were resuspended in 250 ul of conjugation buffer containing 5mM BS<sup>3</sup> in a tube and incubated on a rotator for 40 min at room temperature. Antibody crosslinked beads were separated and the crosslinker was quenched with an equal volume of 1M glycine (1x volume of beads). The crosslinked beads were then washed once in PBS at 4 C for 5 min, followed by incubation in 100 ul of 0.11M glycine (pH2.5) for 10 min at 4 C to remove any uncrosslinked antibody. The crosslinked beads were then washed thrice in PBS tween-20 (0.1%) + 0.5 % BSA, followed by another three washes in IP buffer before transferring them to a 15 ml falcon tube containing 4 mg of nuclear lysate made up in IP buffer up to a final volume of 10ml and left on rotator overnight at 4 C. The following day the beads were washed and proteins were eluted as described above. Samples were run on a short gel from which the regions containing the proteins were cut out and processed for mass spectrometry and peptide identification.

### **In-gel Digestion**

Gel slices were cut into 1x1 mm pieces and placed in 1.5 mL eppendorf tubes with 1 mL of water for 30 min. The water was then removed and 50 µL of 250 mM ammonium bicarbonate followed by 10 µL of 45 mM 1, 4 dithiothreitol (DTT) were added prior to incubation at 50 °C for 30 min. The samples were cooled to room temperature and then alkylated with 10 µL of 100 mM iodoacetamide for 30 min. The gel pieces were washed 2x with 1 mL of water, removed and added 1 mL of 50 mM ammonium bicarbonate:acetonitrile (1:1) and allowed to incubate at room temperature for 1 hr. The solution was then removed and 200 µL of acetonitrile was added, removed, and the gel pieces dried by SpeedVac. Gel pieces were rehydrated in 70 µL of 2 ng/µL trypsin (Sigma) and 0.01% ProteaseMAX surfactant (Promega) in 50mM ammonium bicarbonate and incubated at 37 °C for 21hrs. Supernatant was removed, gel pieces added 100 µL of 80:20 (1% (v/v) formic acid in acetonitrile), combined with the former supernatant, and dried on a SpeedVac. Samples were reconstituted in 25 µL of 5% acetonitrile (0.1% (v/v) trifluoroacetic acid) for LC-MS/MS analysis.

## LC-MS/MS

Tryptic peptides were dissolved in 0.1% trifluoroacetic acid and directly loaded at 4  $\mu\text{L}/\text{min}$  for 7 minutes onto a custom-made trap column (100  $\mu\text{m}$  I.D. fused silica with Kasil frit) containing 2 cm of 200 $\text{\AA}$ , 5  $\mu\text{m}$  Magic C18AQ particles (Michrom Bioresources). Peptides were then eluted onto a custom-made analytical column (75  $\mu\text{m}$  I.D. fused silica) with gravity-pulled tip and packed with 25 cm 100 $\text{\AA}$ , 5  $\mu\text{m}$  Magic C18AQ particles (Michrom). Peptides were eluted with a linear gradient from 100% solvent A (0.1% (v/v) formic acid in water:0.1% formic acid in acetonitrile (95:05)) to 35% solvent B (0.1% (v/v) formic acid in acetonitrile) in 90 minutes at 300 nanoliters per minute using a Waters NanoAcquity UPLC system directly coupled to a Thermo Scientific Q Exactive hybrid mass spectrometer. Data were acquired using a data-dependent acquisition routine of acquiring one mass spectrum ( $m/z$  300 -1750) in the Orbitrap (resolution 70,000, 1e6 charges, 30 ms maximum fill time) followed by 10 tandem mass spectrometry scans (resolution 17,500, 1e5 charges, 110 ms maximum fill time, HCD collision energy 27 eV NCE). Dynamic exclusion was employed to maximize the number of peptide identifications and minimize data redundancy.

## Data Analysis

Raw data files were processed into peak lists using Proteome Discoverer (version 1.4; Thermo Scientific) and then searched against the Uniprot mouse database with Mascot (version 2.5; Matrix Science) using precursor mass tolerances of 10 ppm and fragment mass tolerances of 0.5 Da. Full tryptic specificity was specified considering up to 2 missed cleavages; variable modifications of acetylation (protein N-term), pyro-glutamination (N-term glutamine), and oxidation (methionine) were considered and fixed modifications of carbamidomethylation (cysteine) were considered. Mascot search results were loaded into Scaffold (Proteome Software) with threshold values of 80% for peptides (1.0% false-discovery rate) and 90% for proteins (2 peptide minimum) for final annotation.

**Supplemental references:**

- Heinz, S., Benner, C., Spann, N., Bertolino, E., Lin, Y. C., Laslo, P., Cheng, J. X., Murre, C., Singh, H. and Glass, C. K.** (2010). Simple Combinations of Lineage-Determining Transcription Factors Prime cis-Regulatory Elements Required for Macrophage and B Cell Identities. *Mol. Cell* **38**, 576–589.
- Langmead, B. and Salzberg, S. L.** (2012). Fast gapped-read alignment with Bowtie 2. *Nat. Methods* **9**, 357–359.
- Langmead, B., Trapnell, C., Pop, M. and Salzberg, S.** (2009). Ultrafast and memory-efficient alignment of short DNA sequences to the human genome. *Genome Biol.* **10**, R25.
- Li, H., Handsaker, B., Wysoker, A., Fennell, T., Ruan, J., Homer, N., Marth, G., Abecasis, G. and Durbin, R.** (2009). The Sequence Alignment/Map format and SAMtools. *Bioinformatics* **25**, 2078–2079.
- Quinlan, A. R. and Hall, I. M.** (2010). BEDTools: A flexible suite of utilities for comparing genomic features. *Bioinformatics* **26**, 841–842.
- Raab, J. R., Resnick, S. and Magnuson, T.** (2015). Genome-Wide Transcriptional Regulation Mediated by Biochemically Distinct SWI/SNF Complexes. *PLoS Genet.* **11**, 1–26.
- Ramírez, F., Ryan, D. P., Grüning, B., Bhardwaj, V., Kilpert, F., Richter, A. S., Heyne, S., Dündar, F. and Manke, T.** (2016). deepTools2: a next generation web server for deep-sequencing data analysis. *Nucleic Acids Res.* **44**, W160–W165.
- Shibata, Y., Sheffield, N. C., Fedrigo, O., Babbitt, C. C., Wortham, M., Tewari, A. K., London, D., Song, L., Lee, B. K., Iyer, V. R., et al.** (2012). Extensive evolutionary changes in regulatory element activity during human origins are associated with altered gene expression and positive selection. *PLoS Genet.* **8**,.
- Sousa, M. M. L., Steen, K. W., Hagen, L. and Slupphaug, G.** (2011). Antibody cross-linking and target elution protocols used for immunoprecipitation significantly modulate signal-to noise ratio in downstream 2D-PAGE analysis. *Proteome Sci.* **9**, 45.
- Wilkinson, L.** (2011). ggplot2: Elegant Graphics for Data Analysis by WICKHAM, H. *Biometrics* **67**, 678–679.
- Zhang, Y., Liu, T., Meyer, C. A., Eckhoute, J., Johnson, D. S., Bernstein, B. E., Nussbaum, C., Myers, R. M., Brown, M., Li, W., et al.** (2008). Model-based analysis of ChIP-Seq (MACS). *Genome Biol.* **9**,.

## Supplemental\_Table\_S4.doc

| Antibody                                         | Vendor (catalog #)                                     | Application                            |
|--------------------------------------------------|--------------------------------------------------------|----------------------------------------|
| Rabbit anti-BRG1                                 | Abcam (ab110641)                                       | ChIP-seq (10 µg)<br>IF (1:500)         |
| Rabbit anti- YH2Ax                               | Cell signaling (9718)                                  | IF (1:1000)                            |
| Mouse anti- YH2Ax                                | Millipore (05-636)                                     | IF (1:1000)                            |
| Mouse anti-SYCP3                                 | Abcam (ab97672)                                        | IF (1:500)                             |
| Rabbit anti-SYCP3                                | Abcam (ab154255)                                       | IF (1:500)<br>WB (1:1000)              |
| Rabbit anti-SYCP2                                | Millipore (ABE2622)                                    | IF (1:500)<br>WB (1:1000)              |
| Goat anti- ATR (N-19)                            | Santa Cruz Biotech (sc-1887)                           | IF (1:50)                              |
| Mouse anti-SCML2 (1D12)                          | Developmental Studies Hybridoma Bank (PCRP-SCML2-1D12) | IF (1:10)<br>IP (10 µg)                |
| Rat anti- RNAPII subunit B1 (phosphor CTD Ser-2) | Millipore (04-1571)                                    | IF (1:200)                             |
| Mouse anti- H2AK119ub1 (E6C5)                    | Millipore (05-678)                                     | ChIP-seq (10 µg)<br>WB (1:1000)        |
| Rabbit anti- H3K27ac                             | Active Motif (39133)                                   | ChIP-seq (5 µg)<br>WB (1:1000)         |
| Rabbit anti- H2BK120ub1                          | Cell signaling (5546)                                  | WB (1:1000)                            |
| Mouse anti- H3K27me3                             | Abcam (ab6002)                                         | WB (1:1000)                            |
| Rabbit anti- H3K4me3                             | Abcam (ab1012)                                         | WB (1:1000)                            |
| Rabbit anti- H3                                  | Abcam (ab1791)                                         | WB (1:5000)                            |
| Mouse anti- RNF2                                 | Santa Cruz Biotech (sc-1887)                           | WB (1:1000)                            |
| Mouse anti- USP3                                 | GeneTex (GTX128238)                                    | WB (1:1000)                            |
| Mouse anti- USP7                                 | Santa Cruz Biotech (sc-1887)                           | IF (1:100)<br>IP (2 µg)<br>WB (1:1000) |
| Mouse anti- HDAC1                                | Abcam (ab7028)                                         | WB (1:1000)                            |
| Rabbit anti- PDGFRA                              | Cell signaling (3164)                                  | WB (1:1000)                            |
| Mouse anti α TUBULIN                             | Developmental Studies Hybridoma Bank (12G10)           | WB (1:1000)                            |
| Rabbit anti NCL (Nucleolin)                      | Bethyl (A300-711A)                                     | WB (1:5000)                            |

**Table. S4.** List of antibodies used in this study

## Supplemental\_Table\_S5.doc

| Gene Symbol   | Forward Primer (5' - 3') | Reverse Primer (5' - 3') |
|---------------|--------------------------|--------------------------|
| <i>Zbtb16</i> | TATCTCGAAGCATTCCAGCGAGGA | ACTCATGGCTGAGAGACCGAAAGA |
| <i>Id4</i>    | CCCGCGCCACCTCTCCAC       | CAGAGAATGCTGTCA CCCTG    |
| <i>Pou3f1</i> | TGGGGGCTGTCACCTTTATTC    | GGAGTTAGAAGGACCCCAAG     |
| <i>Pou5f1</i> | AGCTGCTGAAGCAGAAGAGG     | GTGGTCTGGCTGAACACCTT     |
| <i>Foxo1</i>  | AAGAGCGTGCCCTACTTCAA     | TGCTGTGAAGGGACAGATTG     |
| <i>Sdha</i>   | TGGACCTTGTAGTCTTTGGCA    | AACCGATTCTTCTCCAGCATT    |
| <i>Ywhaz</i>  | GAGAAAAGCAGCAGATGGC      | CTTTCTGGTTGCCAAGCATT     |
| <i>Brg1</i>   | GAAGACCATCCAGACCATCG     | TTCATACGCCCAAGTTTGACA    |

**Table. S5.** Sequences of qRT-PCR primer used in this study
